# Supplementary material
Source: publisher figshare collection journal article supplement (https://gsajournals.figshare.com/ndownloader/files/28618077)
Supplement: Supplementary file 1 [file 28618077]

## Sheet: Sheet1
Table S1. Differentially expressed genes induced by MSB (up-regulated)
FBgn	Name	Symbol	Annotation Symbol	Chrom	Length	baseMean	log2FoldChange	lfcSE	stat	pvalue	padj
FBgn0032699	-	CG10383	CG10383	2L	3046	7295.53	3.12663	0.14571	21.4579	3.85696e-102	5.34574e-98
FBgn0038957	-	CG7059	CG7059	3R	1332	1241.73	2.42597	0.114043	21.2725	2.0419e-100	1.41504e-96
FBgn0010038	Glutathione S transferase D2	GstD2	CG4181	3R	734	12652.6	6.11716	0.289504	21.1298	4.23337e-99	1.95582e-95
FBgn0005660	Ets at 21C	Ets21C	CG2914	2L	4461	2426.55	3.93889	0.189282	20.8097	3.53451e-96	1.22471e-92
FBgn0033153	Growth arrest and DNA damage-inducible 45	Gadd45	CG11086	2R	1495	3331.2	3.83364	0.185381	20.6797	5.27568e-95	1.46242e-91
FBgn0010042	Glutathione S transferase D6	GstD6	CG4423	3R	780	454.365	6.7121	0.325759	20.6045	2.50007e-94	5.77515e-91
FBgn0035439	-	CG14961	CG14961	3L	3063	965.656	4.70136	0.236319	19.8941	4.5766e-88	9.06166e-85
FBgn0053542	unpaired 3	upd3	CG33542	X	2221	88.9483	4.8422	0.244659	19.7916	3.51518e-87	6.09005e-84
FBgn0028978	tribbles	trbl	CG5408	3L	2372	3321.17	2.81353	0.142793	19.7036	2.00931e-86	3.09433e-83
FBgn0032805	-	CG10337	CG10337	2L	1297	495.172	3.25793	0.165824	19.647	6.13758e-86	8.50668e-83
FBgn0030357	Sclp	Sclp	CG2471	X	1766	1271.9	1.85211	0.0986992	18.7652	1.45495e-78	1.83324e-75
FBgn0261113	Xrp1	Xrp1	CG17836	3R	3619	35099.6	1.55993	0.083561	18.6681	8.99343e-78	1.03874e-74
FBgn0063497	Glutathione S transferase E3	GstE3	CG17524	2R	755	15291.6	3.37859	0.183661	18.3958	1.42042e-75	1.51439e-72
FBgn0030904	unpaired 2	upd2	CG5988	X	1980	73.9677	4.54619	0.2477	18.3536	3.08851e-75	3.05762e-72
FBgn0033190	Glycerophosphate oxidase 2	Gpo2	CG2137	2R	2379	256.683	4.09128	0.22805	17.9403	5.71212e-72	5.27799e-69
FBgn0000071	Amalgam	Ama	CG2198	3R	1833	179.974	3.93454	0.219901	17.8924	1.35251e-71	1.17161e-68
FBgn0030013	Phospholipase A2 group III	GIIIspla2	CG1583	X	1543	5860.47	2.42219	0.136002	17.81	5.90784e-71	4.81662e-68
FBgn0037565	-	CG9626	CG9626	3R	5550	802.73	1.57685	0.0888083	17.7557	1.55729e-70	1.19911e-67
FBgn0010043	Glutathione S transferase D7	GstD7	CG4371	3R	756	266.436	5.85203	0.338799	17.2729	7.53199e-67	5.21967e-64
FBgn0039580	Glutamine:fructose-6-phosphate aminotransferase 2	Gfat2	CG1345	3R	2545	5204.71	1.94439	0.11315	17.1841	3.49294e-66	2.30534e-63
FBgn0000566	Ecdysone-induced protein 55E	Eip55E	CG5345	2R	1478	3084.75	1.97711	0.115614	17.101	1.45784e-65	9.18439e-63
FBgn0042206	Glutathione S transferase D10	GstD10	CG18548	3R	876	850.35	3.19167	0.1868	17.086	1.88609e-65	1.13657e-62
FBgn0038073	-	CG14395	CG14395	3R	4224	130.432	5.36873	0.316174	16.9803	1.14892e-64	6.635e-62
FBgn0051146	Neuroligin 1	Nlg1	CG31146	3R	6006	885.124	1.05126	0.0619627	16.9661	1.46404e-64	8.11663e-62
FBgn0033204	-	CG2065	CG2065	2R	1233	12837.9	4.73272	0.279128	16.9554	1.75659e-64	9.364e-62
FBgn0037151	-	CG7130	CG7130	3L	701	904.673	3.55684	0.210066	16.932	2.61203e-64	1.34084e-61
FBgn0030679	-	CG8206	CG8206	X	1188	6823.59	1.44256	0.0857633	16.8202	1.7355e-63	8.59071e-61
FBgn0010040	Glutathione S transferase D4	GstD4	CG11512	3R	725	249.499	4.73031	0.281988	16.7749	3.72685e-63	1.78118e-60
FBgn0086346	ALG-2 interacting protein X	ALiX	CG12876	3R	2892	8465.73	0.920097	0.0553227	16.6315	4.12428e-62	1.90542e-59
FBgn0014455	Adenosylhomocysteinase	Ahcy	CG11654	X	2119	8502.72	2.02981	0.122184	16.6126	5.64522e-62	2.52396e-59
FBgn0263621	-	CG43630	CG43630	3R	251	55.5613	3.55092	0.215494	16.478	5.27658e-61	2.28542e-58
FBgn0039260	Smg6	Smg6	CG6369	3R	3310	5845.02	0.754343	0.045791	16.4736	5.67959e-61	2.38543e-58
FBgn0033226	pummelig	puml	CG1882	2R	2695	6438.04	1.57557	0.0957058	16.4626	6.81054e-61	2.77629e-58
FBgn0032587	-	CG5953	CG5953	2L	4576	4029.42	2.65005	0.161285	16.4309	1.14981e-60	4.55325e-58
FBgn0086347	Myosin 31DF	Myo31DF	CG7438	2L	4318	4260.36	1.69938	0.104954	16.1916	5.78143e-59	2.22585e-56
FBgn0037071	-	CG7632	CG7632	3L	1442	1180.48	1.1935	0.0740022	16.1279	1.62569e-58	5.92949e-56
FBgn0033928	Arc2	Arc2	CG13941	2R	902	708.346	3.12409	0.193965	16.1065	2.29845e-58	8.16833e-56
FBgn0029831	-	CG5966	CG5966	X	3751	16541.9	3.06096	0.190941	16.0309	7.76887e-58	2.56373e-55
FBgn0001149	Glutathione S transferase D1	GstD1	CG10045	3R	843	45525.8	2.14568	0.134738	15.9248	4.26094e-57	1.37341e-54
FBgn0010041	Glutathione S transferase D5	GstD5	CG12242	3R	840	3011.09	5.97527	0.377742	15.8184	2.32349e-56	7.15635e-54
FBgn0019890	Smg5 nonsense mediated mRNA decay factor	Smg5	CG8954	2L	4809	12067.4	1.01994	0.0646839	15.7681	5.15506e-56	1.55324e-53
FBgn0034996	-	CG13575	CG13575	2R	1882	243.914	3.80632	0.243619	15.624	4.99343e-55	1.44185e-52
FBgn0030014	-	CG15337	CG15337	X	1430	360.714	4.26926	0.273435	15.6134	5.89692e-55	1.66799e-52
FBgn0037339	Phosphatidylinositol 4-kinase II alpha	Pi4KIIalpha	CG2929	3R	3122	3327.68	0.432861	0.0277553	15.5956	7.79557e-55	2.16093e-52
FBgn0034850	-	CG9875	CG9875	2R	730	64.5211	5.75014	0.36947	15.5632	1.29376e-54	3.51598e-52
FBgn0033216	-	CG1946	CG1946	2R	1189	85.2249	4.23669	0.272333	15.557	1.4259e-54	3.80058e-52
FBgn0001225	Heat shock protein 26	Hsp26	CG4183	3L	1010	9934.7	4.26115	0.275295	15.4785	4.84742e-54	1.24417e-51
FBgn0036196	-	CG11658	CG11658	3L	2563	3247.54	0.602649	0.0389729	15.4633	6.13917e-54	1.54707e-51
FBgn0020653	Thioredoxin reductase-1	Trxr-1	CG2151	X	2277	16399.2	1.59874	0.103579	15.435	9.51693e-54	2.35544e-51
FBgn0001228	-	CG4456	CG4456	3L	1900	82.3144	4.93453	0.319963	15.4222	1.16138e-53	2.82398e-51
FBgn0025627	-	CG4194	CG4194	X	1097	86.6827	2.10397	0.136874	15.3716	2.53689e-53	6.0623e-51
FBgn0001226	Heat shock protein 27	Hsp27	CG4466	3L	1632	2467.04	4.02747	0.263291	15.2966	8.04973e-53	1.89101e-50
FBgn0036449	brummer	bmm	CG5295	3L	2437	6729.62	1.72995	0.114131	15.1575	6.75443e-52	1.56027e-49
FBgn0039419	-	CG12290	CG12290	3R	4453	3093.96	1.27161	0.0839892	15.1401	8.80158e-52	1.96758e-49
FBgn0003231	refractory to sigma P	ref(2)P	CG10360	2L	2395	28716.9	2.16442	0.143792	15.0524	3.32782e-51	7.32121e-49
FBgn0029830	Glutamate receptor interacting protein	Grip	CG14447	X	3764	1028.74	1.72506	0.115097	14.9879	8.80367e-51	1.90654e-48
FBgn0034389	Multiple C2 domain and transmembrane region protein	Mctp	CG15078	2R	4223	4554.84	0.948379	0.063299	14.9825	9.55069e-51	2.0365e-48
FBgn0261625	Glutaminase	GLS	CG42708	2R	3005	6005.45	1.97457	0.13355	14.7853	1.82364e-49	3.82963e-47
FBgn0040319	Glutamate-cysteine ligase catalytic subunit	Gclc	CG2259	X	4238	10778.8	1.81448	0.122765	14.7801	1.96757e-49	4.07023e-47
FBgn0033205	-	CG2064	CG2064	2R	1210	2654.07	2.48825	0.169149	14.7105	5.52311e-49	1.10942e-46
FBgn0001224	Heat shock protein 23	Hsp23	CG4463	3L	884	4320.82	3.30967	0.226384	14.6197	2.10285e-48	4.105e-46
FBgn0020388	Gcn5 acetyltransferase	Gcn5	CG4107	3L	2770	2161.65	0.586391	0.0403052	14.5488	5.94601e-48	1.12893e-45
FBgn0038475	Keap1	Keap1	CG3962	3R	3162	2124.79	1.64909	0.113538	14.5247	8.45671e-48	1.58392e-45
FBgn0003046	Pupal cuticle protein	Pcp	CG3440	2L	718	144.321	2.89277	0.201417	14.3621	8.9434e-47	1.63099e-44
FBgn0034403	-	CG18190	CG18190	2R	1077	63.6127	3.90211	0.273142	14.286	2.67573e-46	4.75457e-44
FBgn0283741	prage	prage	CG14801	X	3806	1265.79	1.55582	0.11008	14.1335	2.35977e-45	4.14006e-43
FBgn0050489	Cytochrome P450 12d1 proximal	Cyp12d1-p	CG30489	2R	4482	9254.55	3.26876	0.231536	14.1177	2.95458e-45	5.11881e-43
FBgn0051272	-	CG31272	CG31272	3R	2102	1078.9	3.86268	0.276174	13.9864	1.88813e-44	3.1914e-42
FBgn0005278	S-adenosylmethionine Synthetase	Sam-S	CG2674	2L	2429	22514.7	1.01327	0.0729356	13.8927	7.01238e-44	1.17098e-41
FBgn0029507	Tetraspanin 42Ed	Tsp42Ed	CG12846	2R	1248	3388.8	2.34096	0.168738	13.8733	9.19037e-44	1.51641e-41
FBgn0023541	Cytochrome P450 4d14	Cyp4d14	CG3540	X	1694	1128.43	2.50255	0.181902	13.7577	4.57695e-43	7.29156e-41
FBgn0035445	Iduronate 2-sulfatase	Ids	CG12014	3L	1636	816.807	1.75596	0.127846	13.735	6.26817e-43	9.87237e-41
FBgn0038484	-	CG5246	CG5246	3R	1085	118.239	5.06362	0.368773	13.731	6.62158e-43	1.01972e-40
FBgn0033592	-	CG13215	CG13215	2R	621	74.095	4.88562	0.356772	13.6939	1.10346e-42	1.68065e-40
FBgn0031037	-	CG14207	CG14207	X	1380	11553.5	1.58298	0.115605	13.693	1.1174e-42	1.68338e-40
FBgn0000565	Methionine sulfoxide reductase A	MsrA	CG7266	3L	1090	8695.65	1.64248	0.120106	13.6753	1.42668e-42	2.12621e-40
FBgn0027493	Adenylosuccinate Synthetase	AdSS	CG17273	3R	1951	6690.82	0.95479	0.0698861	13.6621	1.71026e-42	2.52172e-40
FBgn0023129	astray	aay	CG3705	3L	1529	23562.2	1.76385	0.129262	13.6456	2.14487e-42	3.06473e-40
FBgn0028394	-	CG17834	CG17834	2L	2034	1046.21	1.5086	0.110591	13.6413	2.27461e-42	3.21694e-40
FBgn0010417	TBP-associated factor 6	Taf6	CG32211	3L	2056	1260.61	0.542164	0.0397918	13.625	2.84332e-42	3.98065e-40
FBgn0028717	Lnk	Lnk	CG17367	3R	3287	3955.77	0.463015	0.0340173	13.6112	3.43606e-42	4.76237e-40
FBgn0051296	-	CG31296	CG31296	3R	1288	77.8405	4.20721	0.309219	13.6059	3.69221e-42	5.01706e-40
FBgn0002069	Aspartyl-tRNA synthetase	AspRS	CG3821	2R	2246	3294.72	1.37892	0.102061	13.5107	1.35245e-41	1.8024e-39
FBgn0035904	Glutathione S transferase O3	GstO3	CG6776	3L	881	7347.91	2.76516	0.205279	13.4702	2.34133e-41	3.0614e-39
FBgn0030015	-	CG10761	CG10761	X	1253	32.2859	3.79145	0.282278	13.4316	3.94837e-41	5.11443e-39
FBgn0265003	klaroid	koi	CG44154	2R	4276	3643.43	0.595009	0.0443709	13.4099	5.29289e-41	6.79254e-39
FBgn0053503	Cytochrome P450 12d1 distal	Cyp12d1-d	CG33503	2R	1812	10571.2	3.46978	0.259914	13.3497	1.18908e-40	1.51199e-38
FBgn0039644	red dog mine	rdog	CG11897	3R	5031	2715.64	1.26395	0.0953142	13.2609	3.90014e-40	4.82643e-38
FBgn0033087	Heparan sulfate C5-epimerase	Hsepi	CG3194	2R	3054	1544.1	0.470659	0.0355173	13.2516	4.41921e-40	5.42038e-38
FBgn0034420	-	CG10737	CG10737	2R	3953	10560.1	0.346737	0.0262245	13.2219	6.55868e-40	7.90464e-38
FBgn0035438	PHGPx	PHGPx	CG12013	3L	1148	11965.4	1.49143	0.112847	13.2164	7.05433e-40	8.42871e-38
FBgn0003209	raw	raw	CG12437	2L	4275	6123.93	0.997905	0.0756469	13.1916	9.8058e-40	1.16161e-37
FBgn0031695	Cytochrome P450 4ac3	Cyp4ac3	CG14031	2L	1606	929.755	2.21372	0.168191	13.1619	1.45387e-39	1.69333e-37
FBgn0030894	Multivesicular body subunit 12	Mvb12	CG7192	X	2126	1301.66	0.819646	0.0623748	13.1407	1.92538e-39	2.22381e-37
FBgn0039694	fos intronic gene	fig	CG7615	3R	1180	43.5765	3.51794	0.267843	13.1343	2.09358e-39	2.39065e-37
FBgn0023535	arginase	arg	CG18104	X	1243	292.65	2.56243	0.1951	13.1339	2.10433e-39	2.39065e-37
FBgn0036240	-	CG6928	CG6928	3L	2445	1138.73	2.0087	0.153028	13.1264	2.32475e-39	2.6196e-37
FBgn0063493	Glutathione S transferase E7	GstE7	CG17531	2R	765	6057.05	3.63696	0.277218	13.1195	2.54631e-39	2.84611e-37
FBgn0086708	starvin	stv	CG32130	3L	3357	12408.1	1.83789	0.140323	13.0976	3.39756e-39	3.73732e-37
FBgn0013275	Heat-shock-protein-70Aa	Hsp70Aa	CG31366	3R	2382	21112	4.70618	0.359405	13.0944	3.54614e-39	3.83981e-37
FBgn0286785	scab	scb	CG8095	2R	4643	2358.32	1.57697	0.120588	13.0773	4.43825e-39	4.76854e-37
FBgn0032399	-	CG6785	CG6785	2L	3980	447.783	2.01207	0.154019	13.0638	5.30095e-39	5.65163e-37
FBgn0029824	-	CG3726	CG3726	X	3129	2109.15	0.493975	0.0378506	13.0506	6.30206e-39	6.61716e-37
FBgn0032793	-	CG10189	CG10189	2L	1349	522.329	0.771419	0.0592359	13.0228	9.07464e-39	9.38616e-37
FBgn0035540	Syntaxin 17	Syx17	CG7452	3L	1566	2051.4	0.884225	0.0680006	13.0032	1.17324e-38	1.18694e-36
FBgn0002641	maroon-like	mal	CG1692	X	3209	1450.68	1.63368	0.125807	12.9856	1.47632e-38	1.47207e-36
FBgn0013276	Heat-shock-protein-70Ab	Hsp70Ab	CG18743	3R	2375	21220.1	4.68057	0.361175	12.9593	2.08152e-38	2.04609e-36
FBgn0001291	Jun-related antigen	Jra	CG2275	2R	1565	2623.68	1.10025	0.0849485	12.952	2.28885e-38	2.23404e-36
FBgn0283680	Inositol 1,4,5-triphosphate kinase 2	IP3K2	CG45017	X	2979	5593.86	1.17951	0.0913918	12.906	4.16123e-38	3.95032e-36
FBgn0260770	-	CG42568	CG42568	2R	1472	1490.39	0.649444	0.050329	12.904	4.27542e-38	4.03111e-36
FBgn0051809	-	CG31809	CG31809	2L	1338	4062.59	3.50079	0.271377	12.9001	4.49637e-38	4.18253e-36
FBgn0002577	miniature	m	CG9369	X	3405	105.609	2.88141	0.223606	12.8861	5.38947e-38	4.97987e-36
FBgn0031263	Translocator protein	Tspo	CG2789	2L	853	5969.29	1.24666	0.0967703	12.8827	5.63506e-38	5.17232e-36
FBgn0034480	-	CG16898	CG16898	2R	1325	6760	3.38944	0.264075	12.8352	1.04188e-37	9.43818e-36
FBgn0034052	-	CG8299	CG8299	2R	874	65.1231	4.60329	0.361818	12.7227	4.42542e-37	3.90677e-35
FBgn0033215	Diacylglycerol O-acyltransferase 2	Dgat2	CG1942	2R	1305	1647.52	3.73254	0.293661	12.7104	5.17916e-37	4.54324e-35
FBgn0034605	UDP-glycosyltransferase family 49 member C1	Ugt49C1	CG15661	2R	1899	3663.35	1.53341	0.120729	12.7013	5.81442e-37	5.06842e-35
FBgn0033292	Cytochrome P450 4ad1	Cyp4ad1	CG2110	2R	1698	56.7652	2.75491	0.21811	12.6308	1.42729e-36	1.21363e-34
FBgn0033594	-	CG13226	CG13226	2R	953	71.4075	4.27637	0.33884	12.6206	1.62532e-36	1.36527e-34
FBgn0264357	SNF4/AMP-activated protein kinase gamma subunit	SNF4Agamma	CG17299	3R	6292	10795	0.497798	0.039567	12.5811	2.68104e-36	2.19877e-34
FBgn0010223	G protein alpha f subunit	Galphaf	CG12232	3L	1825	155.258	1.92473	0.153408	12.5465	4.1558e-36	3.36838e-34
FBgn0038455	-	CG14907	CG14907	3R	1103	488.168	1.60948	0.128636	12.5119	6.42687e-36	5.17886e-34
FBgn0037936	-	CG6908	CG6908	3R	1439	9220.52	2.69601	0.215497	12.5107	6.52845e-36	5.23031e-34
FBgn0021872	X box binding protein-1	Xbp1	CG9415	2R	2138	21373.5	0.696167	0.0556583	12.5079	6.76193e-36	5.38623e-34
FBgn0031535	-	CG12795	CG12795	2L	1072	2450.37	2.26516	0.181626	12.4715	1.06744e-35	8.45411e-34
FBgn0041184	Suppressor of cytokine signaling at 36E	Socs36E	CG15154	2L	3503	3009.72	0.953985	0.0766858	12.4402	1.58173e-35	1.23858e-33
FBgn0033203	-	CG2070	CG2070	2R	1381	121.004	3.71414	0.298723	12.4334	1.72216e-35	1.34096e-33
FBgn0261560	Thor	Thor	CG8846	2L	755	11859	1.65332	0.133076	12.4239	1.93975e-35	1.49361e-33
FBgn0053969	-	CG33969	CG33969	3L	1665	1559.72	1.47198	0.118569	12.4146	2.17787e-35	1.66769e-33
FBgn0013279	Heat-shock-protein-70Bc	Hsp70Bc	CG6489	3R	2386	2538.19	4.33786	0.349845	12.3994	2.63295e-35	2.00509e-33
FBgn0025628	-	CG4199	CG4199	X	2521	6267.99	1.3351	0.108064	12.3547	4.59431e-35	3.44201e-33
FBgn0030482	-	CG1673	CG1673	X	2510	5673.6	1.91461	0.155137	12.3414	5.42217e-35	4.01878e-33
FBgn0037972	-	CG10005	CG10005	3R	1055	47.5534	2.8206	0.229993	12.2639	1.41598e-34	1.02216e-32
FBgn0259711	-	CG42365	CG42365	2R	908	560.546	2.02831	0.165485	12.2568	1.54518e-34	1.10965e-32
FBgn0028872	-	CG18095	CG18095	2L	2036	13.8881	2.5887	0.211565	12.236	1.99682e-34	1.42659e-32
FBgn0260933	reduced mechanoreceptor potential A	rempA	CG11838	2L	5308	1517.37	1.1744	0.0960909	12.2217	2.37979e-34	1.69148e-32
FBgn0037659	Lysine demethylase 2	Kdm2	CG11033	3R	5356	4152.16	0.420849	0.0344686	12.2096	2.76177e-34	1.94305e-32
FBgn0036232	-	CG14125	CG14125	3L	860	28.0587	5.15006	0.423505	12.1606	5.04155e-34	3.47641e-32
FBgn0013277	Heat-shock-protein-70Ba	Hsp70Ba	CG31449	3R	2324	7325.67	4.52989	0.372943	12.1463	6.00085e-34	4.11311e-32
FBgn0011774	Inverted repeat-binding protein	Irbp	CG5247	3R	2149	471.005	0.861784	0.0711757	12.1078	9.59889e-34	6.45828e-32
FBgn0033188	Death resistor Adh domain containing target	Drat	CG1600	2R	2102	14881.2	0.908354	0.0751969	12.0797	1.35263e-33	9.0132e-32
FBgn0034628	acyl-Coenzyme A oxidase at 57D proximal	Acox57D-p	CG9707	2R	2552	5889.26	2.205	0.18297	12.0512	1.91238e-33	1.25027e-31
FBgn0067783	Dephosphocoenzyme A carrier	DPCoAC	CG4241	3R	2089	3853.37	1.05193	0.0873829	12.0382	2.23902e-33	1.45013e-31
FBgn0261983	lethal (2) giant discs 1	l(2)gd1	CG4713	2L	3043	1857.42	0.644142	0.0535306	12.0332	2.37863e-33	1.53338e-31
FBgn0037249	eukaryotic translation initiation factor 3 subunit a	eIF3a	CG9805	3R	3892	10576.7	0.535043	0.0445146	12.0195	2.80651e-33	1.80084e-31
FBgn0003741	transformer	tra	CG16724	3L	862	860.632	1.07376	0.0894537	12.0035	3.4059e-33	2.1654e-31
FBgn0015222	Ferritin 1 heavy chain homologue	Fer1HCH	CG2216	3R	1677	43271.1	1.00933	0.0842746	11.9767	4.70487e-33	2.9776e-31
FBgn0034194	-	CG15611	CG15611	2R	1759	1652.18	0.739134	0.0617776	11.9644	5.45641e-33	3.43754e-31
FBgn0053301	-	CG33301	CG33301	2L	1563	1340.02	4.31246	0.362213	11.9059	1.10293e-32	6.82436e-31
FBgn0286723	heimdall	hll	CG4500	2L	2206	2971.5	3.88905	0.327078	11.8903	1.32938e-32	8.15273e-31
FBgn0032006	PDGF- and VEGF-receptor related	Pvr	CG8222	2L	5893	4864.15	0.922906	0.0776221	11.8897	1.33834e-32	8.17156e-31
FBgn0020764	Aminolevulinate synthase	Alas	CG3017	2R	1842	7011.63	1.0184	0.0857079	11.8822	1.46383e-32	8.85971e-31
FBgn0042110	-	CG18765	CG18765	3R	1241	134.775	3.07374	0.258992	11.8681	1.73351e-32	1.04463e-30
FBgn0038727	-	CG7432	CG7432	3R	2921	24.431	3.37955	0.285011	11.8576	1.96466e-32	1.16368e-30
FBgn0030101	-	CG12118	CG12118	X	1277	1248.17	0.482064	0.0406673	11.8538	2.05534e-32	1.21221e-30
FBgn0035715	-	Ist1	CG10103	3L	1605	3480.86	0.883358	0.0747171	11.8227	2.97935e-32	1.74236e-30
FBgn0031161	-	CG15445	CG15445	X	2320	1547.91	0.683454	0.0579836	11.787	4.55435e-32	2.63014e-30
FBgn0051354	Hsp70Bbb	Hsp70Bbb	CG5834	3R	2347	21772.6	4.515	0.383461	11.7743	5.29317e-32	3.03154e-30
FBgn0250832	Ductus ejaculatorius peptide 99B	Dup99B	CG33495	3R	310	16.6533	4.15757	0.354506	11.7278	9.18288e-32	5.23764e-30
FBgn0260429	-	CG42524	CG42524	2R	2167	207.338	2.24917	0.191993	11.7148	1.07009e-31	6.07843e-30
FBgn0035468	Gustatory receptor 63a	Gr63a	CG14979	3L	1470	41.0374	3.32921	0.284266	11.7116	1.11146e-31	6.23676e-30
FBgn0261805	-	CG42751	CG42751	2L	422	373.818	2.23252	0.19123	11.6745	1.72058e-31	9.5772e-30
FBgn0037852	Thiamine pyrophosphate carrier protein 1	Tpc1	CG6608	3R	2161	1218.99	0.665587	0.057032	11.6704	1.80549e-31	1.00096e-29
FBgn0260635	Death-associated inhibitor of apoptosis 1	Diap1	CG12284	3L	2304	14651.4	0.823546	0.0706212	11.6615	2.00578e-31	1.10318e-29
FBgn0013278	Heat-shock-protein-70Bb	Hsp70Bb	CG31359	3R	2347	3806.99	4.35444	0.373727	11.6514	2.25736e-31	1.23664e-29
FBgn0039209	Repressed by TOR	REPTOR	CG13624	3R	5651	6282.35	0.767152	0.0658527	11.6495	2.30759e-31	1.25424e-29
FBgn0030438	-	CG15721	CG15721	X	2804	29.3483	4.94334	0.424413	11.6475	2.36384e-31	1.2798e-29
FBgn0011296	lethal (2) essential for life	l(2)efl	CG4533	2R	741	2824.72	1.6895	0.145314	11.6265	3.02189e-31	1.6297e-29
FBgn0083972	-	CG34136	CG34136	2L	706	927.316	1.51489	0.130565	11.6026	3.9971e-31	2.13899e-29
FBgn0040475	SH3 and PX domain containing 1	SH3PX1	CG6757	3L	2146	2143.46	0.96786	0.0834202	11.6022	4.01502e-31	2.14031e-29
FBgn0028424	Juvenile hormone-inducible protein 26	JhI-26	CG3767	2R	1495	1778.5	0.996989	0.0860239	11.5897	4.64952e-31	2.46906e-29
FBgn0040837	-	CG8620	CG8620	3L	775	436.543	3.10189	0.267713	11.5866	4.81664e-31	2.54804e-29
FBgn0041342	Phosphocholine cytidylyltransferase 1	Pcyt1	CG1049	3L	2754	8982.59	0.729839	0.063046	11.5763	5.43485e-31	2.85329e-29
FBgn0029856	-	CG11700	CG11700	X	1362	193.289	2.33022	0.201747	11.5502	7.36373e-31	3.83689e-29
FBgn0023214	ETS-domain lacking	edl	CG15085	2R	1454	524.686	1.28942	0.111763	11.5371	8.5809e-31	4.45436e-29
FBgn0034542	Fem-1	Fem-1	CG9025	2R	2679	3713.36	0.672624	0.0583052	11.5362	8.66238e-31	4.47987e-29
FBgn0039759	-	CG9733	CG9733	3R	1467	622.31	1.96084	0.169989	11.5351	8.77625e-31	4.52189e-29
FBgn0036996	magro	mag	CG5932	3L	1477	134.992	4.30897	0.374135	11.5171	1.08136e-30	5.55096e-29
FBgn0001230	Heat shock protein 68	Hsp68	CG5436	3R	2231	8025.64	3.39955	0.296091	11.4814	1.63526e-30	8.3326e-29
FBgn0031301	-	CG14339	CG14339	2L	3266	18.7552	3.49128	0.304135	11.4794	1.67515e-30	8.50462e-29
FBgn0260747	Coiled-coil-helix-coiled-coil-helix domain containing 2	Chchd2	CG5010	X	1260	14248.4	0.920378	0.0802639	11.4669	1.93452e-30	9.78559e-29
FBgn0033127	Tetraspanin 42Ef	Tsp42Ef	CG12845	2R	1347	3261.42	1.13171	0.0988221	11.452	2.29717e-30	1.14528e-28
FBgn0034005	Integrin alphaPS4 subunit	ItgaPS4	CG16827	2R	3361	35.1816	2.15118	0.187993	11.4429	2.55242e-30	1.26797e-28
FBgn0039500	-	CG5984	CG5984	3R	1447	221.163	1.21798	0.106803	11.404	3.99428e-30	1.95621e-28
FBgn0032801	-	CG10165	CG10165	2L	1440	1000.9	1.79495	0.157446	11.4005	4.15961e-30	2.03001e-28
FBgn0034243	Nucleostemin 2	Ns2	CG6501	2R	2233	1827.04	0.458054	0.0401926	11.3965	4.3536e-30	2.11722e-28
FBgn0038309	Ammonium transporter	Amt	CG6499	3R	1773	130.857	2.41645	0.212521	11.3704	5.871e-30	2.83526e-28
FBgn0035589	Charged multivesicular body protein 2b	CHMP2B	CG4618	3L	855	1062.65	0.955757	0.0842158	11.3489	7.51029e-30	3.57707e-28
FBgn0032130	brickwall	brwl	CG3838	2L	3091	1450.06	0.928691	0.0818981	11.3396	8.35329e-30	3.95142e-28
FBgn0027565	-	CG5498	CG5498	3L	1523	1314.81	0.913868	0.0806296	11.3342	8.88888e-30	4.17627e-28
FBgn0034513	-	CG13423	CG13423	2R	1626	23.0274	2.97137	0.262288	11.3286	9.46641e-30	4.43258e-28
FBgn0063492	Glutathione S transferase E8	GstE8	CG17533	2R	1122	2346.58	2.5327	0.223715	11.3211	1.03201e-29	4.7999e-28
FBgn0053192	Metallothionein D	MtnD	CG33192	3R	274	132.386	3.31745	0.293829	11.2904	1.46386e-29	6.74056e-28
FBgn0001086	fizzy	fzy	CG4274	2L	1996	25.5043	2.16353	0.191658	11.2885	1.49547e-29	6.86331e-28
FBgn0027525	LTV1 ribosome biogenesis factor	LTV1	CG7686	2R	2099	10793.7	0.555394	0.0492303	11.2816	1.61846e-29	7.40324e-28
FBgn0030016	Odorant receptor 7a	Or7a	CG10759	X	1242	39.3121	3.1966	0.28394	11.258	2.11517e-29	9.64353e-28
FBgn0039241	-	CG11089	CG11089	3R	2272	18617.6	1.67161	0.148612	11.2481	2.3656e-29	1.07499e-27
FBgn0261976	Partner of Sld Five 2	Psf2	CG18013	2L	831	521.291	1.37018	0.121853	11.2446	2.46275e-29	1.11185e-27
FBgn0034897	Sestrin	Sesn	CG11299	2R	4745	7188.41	0.555431	0.0495037	11.22	3.25314e-29	1.45447e-27
FBgn0015279	Phosphatidylinositol 3-kinase 92E	Pi3K92E	CG4141	3R	4839	3196.9	0.608211	0.0542327	11.2148	3.44788e-29	1.53165e-27
FBgn0030026	sniffer	sni	CG10964	X	1761	1992.65	1.44878	0.129281	11.2065	3.79092e-29	1.67332e-27
FBgn0033212	Leucine-rich repeat	LRR	CG1399	2R	6319	3975.77	0.511633	0.0456903	11.1978	4.17777e-29	1.83822e-27
FBgn0026582	High mobility group protein 2	Hmg-2	CG9418	2R	1347	450.101	0.640947	0.0573158	11.1827	4.95526e-29	2.16085e-27
FBgn0030680	-	CG8944	CG8944	X	4350	1443.98	0.77286	0.069279	11.1558	6.71134e-29	2.90685e-27
FBgn0001142	Glutamine synthetase 1	Gs1	CG2718	2L	2396	14544.9	0.703972	0.0631259	11.1519	7.0118e-29	3.02752e-27
FBgn0004395	unkempt	unk	CG4620	3R	6109	4194.77	0.614455	0.0551271	11.1461	7.47824e-29	3.2189e-27
FBgn0033945	-	CG12868	CG12868	2R	688	998.33	1.71386	0.153864	11.1389	8.11521e-29	3.48226e-27
FBgn0034909	pippin	pippin	CG4797	2R	2106	4338.43	1.51346	0.136004	11.1281	9.15892e-29	3.91798e-27
FBgn0014141	cheerio	cher	CG3937	3R	8392	6590.79	1.01351	0.0912561	11.1062	1.16971e-28	4.98834e-27
FBgn0037796	-	CG12814	CG12814	3R	2507	3461.43	1.04255	0.0938987	11.1029	1.21445e-28	5.16327e-27
FBgn0053265	Mucin 68E	Muc68E	CG33265	3L	5578	71.6448	4.73592	0.427582	11.076	1.63951e-28	6.90687e-27
FBgn0038803	-	CG5191	CG5191	3R	2778	5595.04	1.12441	0.101535	11.0741	1.67542e-28	7.03676e-27
FBgn0034639	-	CG15673	CG15673	2R	1143	1000.44	1.31432	0.118746	11.0683	1.78839e-28	7.48853e-27
FBgn0039637	Choline transporter-like 2	Ctl2	CG11880	3R	3463	3230.97	0.689077	0.0623328	11.0548	2.07787e-28	8.64841e-27
FBgn0037347	Sec synthetase	SecS	CG1427	3R	1580	2322.33	0.374639	0.0340211	11.012	3.34669e-28	1.37642e-26
FBgn0015351	Methyltransferase like 4	Mettl4	CG14906	3R	1177	343.234	1.22551	0.111446	10.9965	3.97466e-28	1.62504e-26
FBgn0260755	-	CG42553	CG42553	3L	1251	553.221	0.61478	0.0559296	10.992	4.17414e-28	1.69658e-26
FBgn0032139	-	CG13116	CG13116	2L	1006	1414.8	1.47766	0.13458	10.9798	4.78129e-28	1.93768e-26
FBgn0262146	Metallothionein E	MtnE	CG42872	3R	604	166.167	3.12737	0.285233	10.9642	5.67751e-28	2.29418e-26
FBgn0264294	Cytochrome b5	Cyt-b5	CG2140	2R	830	18845.9	1.19907	0.109367	10.9637	5.7092e-28	2.30028e-26
FBgn0035056	spatzle 6	spz6	CG9196	2R	1647	40.7216	2.49055	0.227553	10.9449	7.0294e-28	2.81582e-26
FBgn0259834	outsiders	out	CG8062	X	3414	2268.61	1.4293	0.13068	10.9374	7.63552e-28	3.03233e-26
FBgn0003450	snake	snk	CG7996	3R	1434	11.7769	3.79513	0.347307	10.9273	8.53544e-28	3.38003e-26
FBgn0042086	Tetraspanin 42Eb	Tsp42Eb	CG18816	2R	865	171.979	2.72672	0.250316	10.8931	1.24311e-27	4.90869e-26
FBgn0085246	-	CG34217	CG34217	2R	738	80.9485	3.42675	0.314856	10.8835	1.38091e-27	5.43735e-26
FBgn0031142	ryder cup	r-cup	CG10998	X	2140	122.049	2.43635	0.224159	10.8689	1.6222e-27	6.33343e-26
FBgn0010812	uncoordinated 45	unc-45	CG2708	3R	3987	1700.05	1.09537	0.100918	10.854	1.90959e-27	7.41369e-26
FBgn0050022	-	CG30022	CG30022	2R	1356	1332.01	0.854157	0.0789324	10.8214	2.72669e-27	1.04978e-25
FBgn0066101	Lipophorin receptor 1	LpR1	CG31094	3R	6012	8132.16	0.500824	0.0463122	10.8141	2.95262e-27	1.13361e-25
FBgn0036772	-	CG5290	CG5290	3L	2917	505.537	1.92688	0.17827	10.8088	3.12684e-27	1.19718e-25
FBgn0014018	Relish	Rel	CG11992	3R	3499	7397.85	1.0577	0.0980004	10.7928	3.72233e-27	1.42125e-25
FBgn0015794	Rab18	Rab18	CG3129	X	833	2379.29	0.81419	0.0754692	10.7884	3.9062e-27	1.48736e-25
FBgn0038745	Caseinolytic protease chaperone subunit	ClpX	CG4538	3R	3865	7342.57	0.462504	0.0429226	10.7753	4.50276e-27	1.70514e-25
FBgn0039478	Neprilysin 5	Nep5	CG6265	3R	3946	66.3396	1.35668	0.125941	10.7724	4.64704e-27	1.75499e-25
FBgn0037275	-	CG14655	CG14655	3R	2137	310.804	1.15351	0.107207	10.7597	5.33586e-27	1.98271e-25
FBgn0031643	-	CG3008	CG3008	2L	2263	2707.48	1.06594	0.0990667	10.7598	5.32755e-27	1.98271e-25
FBgn0015801	Rhythmically expressed gene 5	Reg-5	CG2928	2R	1781	3494.78	0.902979	0.0839634	10.7544	5.64743e-27	2.09287e-25
FBgn0010039	Glutathione S transferase D3	GstD3	CG4381	3R	746	2652.89	2.16363	0.201393	10.7433	6.37069e-27	2.35461e-25
FBgn0052982	-	CG32982	CG32982	2L	3397	2967.5	0.591494	0.0550733	10.7401	6.59585e-27	2.43134e-25
FBgn0029689	-	CG6428	CG6428	X	2699	1422.94	0.961421	0.0895296	10.7386	6.70634e-27	2.46551e-25
FBgn0051104	-	CG31104	CG31104	3R	1382	195.423	2.40969	0.224863	10.7163	8.53907e-27	3.12273e-25
FBgn0031039	Shawn	Shawn	CG14209	X	3255	959.869	0.612179	0.0571562	10.7106	9.07308e-27	3.3006e-25
FBgn0035039	aarF domain containing kinase 1	Adck1	CG3608	2R	1901	474.834	0.736317	0.0687846	10.7047	9.67604e-27	3.51073e-25
FBgn0004554	Ecdysone-dependent gene 91	Edg91	CG7539	3R	593	86.6901	2.67858	0.250313	10.7009	1.00757e-26	3.64619e-25
FBgn0031756	-	CG13992	CG13992	2L	2313	9.76351	3.83753	0.359321	10.68	1.26338e-26	4.56002e-25
FBgn0039316	-	CG11893	CG11893	3R	1415	3762.59	2.35737	0.22102	10.6659	1.46986e-26	5.25057e-25
FBgn0015037	Cytochrome P450 4p1	Cyp4p1	CG10842	2R	1680	15080.9	2.18883	0.205364	10.6583	1.5948e-26	5.66767e-25
FBgn0259708	-	CG42362	CG15675	2R	1930	587.053	1.45149	0.136339	10.6462	1.81699e-26	6.42946e-25
FBgn0039543	Carnitine O-octanoyltransferase	CROT	CG12428	3R	2651	3330.58	1.11588	0.104816	10.6461	1.81843e-26	6.42946e-25
FBgn0053302	Cuticular protein 31A	Cpr31A	CG33302	2L	1229	37.5005	4.18585	0.393352	10.6415	1.91056e-26	6.72089e-25
FBgn0035985	Cuticular protein 67B	Cpr67B	CG3672	3L	1010	5835.67	1.68283	0.158421	10.6225	2.34161e-26	8.21637e-25
FBgn0030876	-	CG6762	CG6762	X	984	756.698	0.571005	0.0537773	10.618	2.45867e-26	8.60534e-25
FBgn0032456	Multidrug-Resistance like Protein 1	MRP	CG6214	2L	5558	17032.2	0.98475	0.0927859	10.6131	2.58904e-26	9.03881e-25
FBgn0035444	-	CG12012	CG12012	3L	1185	1923.19	0.719987	0.0678644	10.6092	2.70039e-26	9.40388e-25
FBgn0286783	Electron transfer flavoprotein-ubiquinone oxidoreductase	Etf-QO	CG12140	2R	2300	5812.38	1.04332	0.0983465	10.6086	2.71764e-26	9.44024e-25
FBgn0030808	Rho GTPase activating protein at 15B	RhoGAP15B	CG4937	X	6046	2554.31	0.753513	0.0710596	10.604	2.85641e-26	9.89745e-25
FBgn0000053	GART trifunctional enzyme	Gart	CG31628	2L	4718	15886.1	1.69359	0.15988	10.5929	3.2153e-26	1.10856e-24
FBgn0050372	ArfGAP with SH3 domain, ankyrin repeat and PH domain	Asap	CG30372	2R	5028	5026	0.372473	0.0351944	10.5833	3.56159e-26	1.22491e-24
FBgn0037236	S-phase kinase-associated protein 2	Skp2	CG9772	3R	2412	237.336	0.839886	0.0794531	10.5708	4.068e-26	1.39216e-24
FBgn0266918	-	CG32486	CG32486	3L	2356	10933.2	0.345326	0.0327083	10.5578	4.67687e-26	1.59659e-24
FBgn0016794	daughter of sevenless	dos	CG1044	3L	4666	2478.63	1.06991	0.10141	10.5503	5.0612e-26	1.72354e-24
FBgn0051454	-	CG31454	CG31454	3R	1736	43.5558	2.04691	0.194079	10.5468	5.25522e-26	1.78087e-24
FBgn0052313	-	CG32313	CG32313	3L	752	21.578	1.99745	0.189385	10.547	5.24263e-26	1.78087e-24
FBgn0262683	-	CG43153	CG43153	2L	729	12.4077	3.998	0.379971	10.5219	6.85078e-26	2.30466e-24
FBgn0262656	Myc	Myc	CG10798	X	9166	2418.02	1.14379	0.108958	10.4975	8.86989e-26	2.95521e-24
FBgn0025624	-	CG4025	CG4025	X	1240	1546.87	0.488895	0.0466038	10.4905	9.55486e-26	3.16819e-24
FBgn0051216	Nicotinamide amidase	Naam	CG31216	3R	1817	1282.29	1.98128	0.189381	10.4619	1.29245e-25	4.23483e-24
FBgn0033498	-	CG12209	CG12209	2R	1268	14.7757	3.25226	0.311139	10.4528	1.42297e-25	4.6515e-24
FBgn0260632	dorsal	dl	CG6667	2L	4724	3388.86	0.66564	0.0636831	10.4524	1.42889e-25	4.65985e-24
FBgn0034083	lambik	lbk	CG8434	2R	5506	2883.59	0.550488	0.0526856	10.4486	1.48767e-25	4.84016e-24
FBgn0040236	c11.1	c11.1	CG12132	X	6204	4186.14	0.696499	0.0666923	10.4435	1.56971e-25	5.08321e-24
FBgn0039684	Odorant-binding protein 99d	Obp99d	CG15505	3R	500	137.6	3.57985	0.343489	10.422	1.96681e-25	6.3543e-24
FBgn0030114	-	CG17754	CG17754	X	2972	1728.2	0.571575	0.0549349	10.4046	2.36261e-25	7.58003e-24
FBgn0052103	Short Calcium-binding Mitochondrial Carrier	SCaMC	CG32103	3L	3836	9817.03	0.836296	0.0804137	10.3999	2.48157e-25	7.94331e-24
FBgn0028983	Serpin 55B	Spn55B	CG10913	2R	1297	1339.58	1.83826	0.177293	10.3685	3.44877e-25	1.09885e-23
FBgn0029603	-	CG14053	CG14053	X	1766	23.6509	2.51196	0.242316	10.3665	3.52325e-25	1.12e-23
FBgn0032401	Promyelocytic leukemia zinc finger	Plzf	CG6792	2L	2152	327.682	0.68797	0.0663668	10.3662	3.53387e-25	1.12081e-23
FBgn0030391	Rab40	Rab40	CG1900	X	1618	1168.94	0.350005	0.033787	10.3592	3.80263e-25	1.2033e-23
FBgn0038168	oocyte maintenance defects	omd	CG9591	3R	3350	1217.87	0.456656	0.0441037	10.3541	4.00796e-25	1.26251e-23
FBgn0037906	Peptidoglycan recognition protein LB	PGRP-LB	CG14704	3R	1255	801.522	1.19245	0.115175	10.3534	4.03952e-25	1.26956e-23
FBgn0004228	midgut expression 1	mex1	CG7936	3L	1034	31.9687	3.35831	0.325225	10.3261	5.36837e-25	1.67204e-23
FBgn0036643	Syntaxin 8	Syx8	CG4109	3L	897	1044.02	0.476698	0.0461731	10.3241	5.48086e-25	1.70325e-23
FBgn0038851	doublesex-Mab related 93B	dmrt93B	CG5737	3R	978	20.4056	2.91551	0.282899	10.3058	6.63174e-25	2.05169e-23
FBgn0263832	Reduction in Cnn dots 5	Rcd5	CG1135	3L	1947	2108.36	0.70779	0.068691	10.304	6.76208e-25	2.08736e-23
FBgn0031571	bark beetle	bark	CG3921	2L	10130	1634.1	0.899671	0.0873399	10.3008	6.98783e-25	2.15225e-23
FBgn0029820	-	CG16721	CG16721	X	2546	5870.44	0.597104	0.0580302	10.2895	7.85553e-25	2.40348e-23
FBgn0035146	-	CG13893	CG13893	3L	2198	1778.73	0.998989	0.0974991	10.2461	1.23167e-24	3.70303e-23
FBgn0051810	-	CG31810	CG31810	2L	1138	702.293	2.97577	0.29051	10.2433	1.26856e-24	3.80567e-23
FBgn0262484	-	CG43074	CG43074	3L	677	60.691	2.82564	0.275899	10.2416	1.29129e-24	3.8655e-23
FBgn0038088	-	CG10126	CG10126	3R	907	2899.39	1.22921	0.120033	10.2406	1.30454e-24	3.88836e-23
FBgn0011205	fumble	fbl	CG5725	3L	2386	5948.68	0.929099	0.0907774	10.2349	1.38315e-24	4.11382e-23
FBgn0038018	Tim17a1	Tim17a1	CG10090	3R	1014	6.73318	4.15393	0.407088	10.204	1.90247e-24	5.58648e-23
FBgn0038100	polyA-binding protein interacting protein 2	Paip2	CG12358	3R	1970	3935.46	0.50873	0.0498551	10.2042	1.89953e-24	5.58648e-23
FBgn0262732	multiprotein bridging factor 1	mbf1	CG4143	3L	1648	4562.32	1.13358	0.111335	10.1817	2.39251e-24	7.01061e-23
FBgn0037447	Neurochondrin	Neurochondrin	CG2330	3R	2580	1561.38	1.02242	0.10056	10.1672	2.77727e-24	8.08676e-23
FBgn0038466	-	CG8907	CG8907	3R	2368	227.585	2.13762	0.210575	10.1514	3.26768e-24	9.4749e-23
FBgn0261561	-	CG42675	CG42675	3R	1834	524.215	1.16043	0.114408	10.1429	3.56465e-24	1.03144e-22
FBgn0030006	-	CG17982	CG17982	X	1286	529.145	0.618058	0.0609435	10.1415	3.61555e-24	1.04182e-22
FBgn0033355	-	CG13748	CG13748	2R	722	10.6376	3.43203	0.338516	10.1384	3.72998e-24	1.07256e-22
FBgn0029890	Fumarase 2	Fum2	CG4095	X	1647	44.4606	1.74179	0.1719	10.1326	3.96027e-24	1.13643e-22
FBgn0037293	Rab geranylgeranyltransferase subunit alpha	RabGGTa	CG12007	3R	1853	1209.43	0.427203	0.0422414	10.1134	4.81974e-24	1.3717e-22
FBgn0051121	-	CG31121	CG31121	3R	3296	906.585	0.908673	0.0900071	10.0956	5.77958e-24	1.63814e-22
FBgn0028343	Ankle2	Ankle2	CG8465	X	3876	2730.59	0.535154	0.0530841	10.0812	6.68719e-24	1.88767e-22
FBgn0086656	shrub	shrb	CG8055	2R	1267	4802.2	0.424945	0.0422378	10.0608	8.23453e-24	2.31034e-22
FBgn0033818	-	CG4712	CG4712	2R	2251	22.9242	2.43019	0.241982	10.0429	9.87781e-24	2.76021e-22
FBgn0034590	Magi	Magi	CG30388	2R	5003	1137.61	0.521752	0.052095	10.0154	1.30434e-23	3.62624e-22
FBgn0031399	missing oocyte	mio	CG7074	2L	2956	904.038	0.429722	0.0429065	10.0153	1.30555e-23	3.62624e-22
FBgn0024248	chico	chico	CG5686	2L	3578	3190.86	0.427607	0.0427157	10.0105	1.37034e-23	3.79859e-22
FBgn0028515	Endonuclease G inhibitor	EndoGI	CG4930	2L	1438	1959.08	0.613372	0.0614107	9.98805	1.71938e-23	4.72829e-22
FBgn0259709	-	CG42363	CG15675	2R	1930	263.777	1.47476	0.148051	9.96118	2.25376e-23	6.18556e-22
FBgn0033110	-	CG9447	CG9447	2R	2198	88.9278	2.25105	0.226012	9.95986	2.28384e-23	6.25573e-22
FBgn0028708	Mst85C	Mst85C	CG11993	3R	1352	778.822	0.502024	0.050507	9.93969	2.79702e-23	7.58642e-22
FBgn0067782	alternative testis transcripts open reading frame B	att-ORFB	CG33488	3R	1327	142.349	1.0841	0.109197	9.92793	3.14736e-23	8.48684e-22
FBgn0086370	sarah	sra	CG6072	3R	2071	4772.14	0.589948	0.0594849	9.91761	3.49009e-23	9.37454e-22
FBgn0014469	Cytochrome P450 4e2	Cyp4e2	CG2060	2R	1880	11845.6	1.366	0.137856	9.90883	3.81077e-23	1.02161e-21
FBgn0025879	Tissue inhibitor of metalloproteases	Timp	CG6281	3R	1591	6078.87	0.672677	0.0679257	9.90313	4.03429e-23	1.07945e-21
FBgn0035251	Vesicle trafficking 1	Vta1	CG7967	3L	1257	2749.26	0.400384	0.0404454	9.89938	4.18876e-23	1.11647e-21
FBgn0053110	-	CG33110	CG33110	3R	2005	5202.14	1.16656	0.117869	9.8971	4.28509e-23	1.13995e-21
FBgn0027561	-	CG18659	CG18659	2R	3816	4289.95	0.500444	0.0505724	9.89559	4.35035e-23	1.15509e-21
FBgn0031298	Autophagy-related 4a	Atg4a	CG4428	2L	4075	5402.24	0.535809	0.0541857	9.88839	4.67487e-23	1.23889e-21
FBgn0038465	Immune-regulated catalase	Irc	CG8913	3R	2390	9210.42	1.21031	0.122502	9.87994	5.08621e-23	1.34276e-21
FBgn0033929	Transcription factor B1	Tfb1	CG8151	2R	2145	1386.98	0.467949	0.0473692	9.87877	5.14616e-23	1.356e-21
FBgn0030764	-	CG9777	CG9777	X	1499	23.0368	1.92648	0.195884	9.83482	7.97095e-23	2.06886e-21
FBgn0262112	shroud	sro	CG12068	3R	1154	31.1939	2.14864	0.21851	9.83316	8.10324e-23	2.09927e-21
FBgn0044826	Pak3	Pak3	CG14895	3R	4983	2879.12	0.640772	0.0652939	9.81366	9.8332e-23	2.52854e-21
FBgn0053299	-	CG33299	CG33299	2L	825	13.5119	2.79819	0.285227	9.81038	1.01589e-22	2.60745e-21
FBgn0034501	-	CG13868	CG13868	2R	3610	54474.7	1.46775	0.149749	9.80142	1.11018e-22	2.83895e-21
FBgn0035346	-	CG1146	CG1146	3L	1903	3231.96	0.728522	0.0744336	9.78755	1.27349e-22	3.2446e-21
FBgn0035847	methuselah-like 7	mthl7	CG7476	3L	1477	10.8585	3.7367	0.382044	9.78082	1.36108e-22	3.46138e-21
FBgn0034709	Secreted Wg-interacting molecule	Swim	CG3074	2R	2049	5167.47	1.58427	0.162131	9.77157	1.49129e-22	3.77865e-21
FBgn0027080	Tyrosyl-tRNA synthetase	TyrRS	CG4561	3L	1771	2592.54	0.506004	0.0517898	9.77033	1.50953e-22	3.81095e-21
FBgn0267824	Proline-rich Akt substrate 40 kDa	PRAS40	CG46146	2R	2632	2453.29	0.574184	0.0587857	9.76741	1.55374e-22	3.90831e-21
FBgn0250869	-	CG42240	CG42240	X	2187	7395.33	1.06337	0.109017	9.75419	1.77002e-22	4.44429e-21
FBgn0031888	PDGF- and VEGF-related factor 2	Pvf2	CG13780	2L	2102	192.456	1.64022	0.168334	9.74379	1.96092e-22	4.89699e-21
FBgn0015296	SHC-adaptor protein	Shc	CG3715	3L	1600	1222.11	0.35552	0.0365117	9.73716	2.09314e-22	5.20841e-21
FBgn0039668	TRC8 ring finger protein	Trc8	CG2304	3R	3704	3999.67	0.808426	0.0830965	9.72876	2.27346e-22	5.64697e-21
FBgn0031267	Ipk2	Ipk2	CG13688	2L	1232	346.939	0.631584	0.0649604	9.7226	2.41534e-22	5.98865e-21
FBgn0051908	-	CG31908	CG31908	2L	2135	2481.19	0.531226	0.0547195	9.70816	2.78323e-22	6.87622e-21
FBgn0036836	-	CG11619	CG11619	3L	2419	377.143	1.84189	0.190575	9.66491	4.2499e-22	1.04439e-20
FBgn0260767	-	CG42565	CG42565	2R	2577	373.528	1.8726	0.193822	9.66147	4.39525e-22	1.0782e-20
FBgn0037724	Frost	Fst	CG9434	3R	1177	16.0761	3.90363	0.40425	9.65649	4.61386e-22	1.12982e-20
FBgn0010621	Chaperonin containing TCP1 subunit 5	CCT5	CG8439	2R	1948	2670.82	0.91882	0.0953096	9.64037	5.39919e-22	1.31516e-20
FBgn0032002	-	CG8353	CG8353	2L	1011	352.107	1.13489	0.117781	9.63557	5.65767e-22	1.3733e-20
FBgn0261458	capulet	capt	CG33979	2L	3049	6034.19	0.424868	0.0441777	9.61725	6.76131e-22	1.63546e-20
FBgn0037555	transcriptional Adaptor 2b	Ada2b	CG9638	3R	2636	1305.6	0.377402	0.0392671	9.61115	7.17408e-22	1.73228e-20
FBgn0028473	Novel nucleolar protein 1	Non1	CG8801	2R	2276	18404.6	0.674565	0.0702912	9.59671	8.25335e-22	1.98252e-20
FBgn0015019	Chaperonin containing TCP1 subunit 3	CCT3	CG8977	3R	2165	2707.61	1.05362	0.109827	9.59346	8.51765e-22	2.04247e-20
FBgn0033391	-	CG8026	CG8026	2R	2926	6115.34	0.610543	0.0636724	9.58882	8.90973e-22	2.13279e-20
FBgn0263106	DnaJ-like-1	DnaJ-1	CG10578	3L	2161	11402.5	1.90697	0.198941	9.58563	9.18966e-22	2.19601e-20
FBgn0029866	-	CG3842	CG3842	X	2655	5004.17	1.73734	0.181322	9.58153	9.56176e-22	2.27708e-20
FBgn0014380	Rho-like	RhoL	CG9366	3R	1205	1051.46	1.13888	0.119139	9.55922	1.18649e-21	2.79672e-20
FBgn0000308	chickadee	chic	CG9553	2L	2091	17436.6	0.412598	0.0432021	9.55042	1.29176e-21	3.03454e-20
FBgn0030881	-	CG12985	CG12985	X	1357	30.1924	1.53293	0.160579	9.54627	1.34448e-21	3.15304e-20
FBgn0050015	-	CG30015	CG30015	2R	6386	8464.67	0.420535	0.0440544	9.5458	1.35057e-21	3.16198e-20
FBgn0039239	-	CG13641	CG13641	3R	542	160.324	1.68564	0.176751	9.53681	1.47299e-21	3.44276e-20
FBgn0003514	spaghetti squash	sqh	CG3595	X	1403	5432.45	0.485591	0.0509476	9.53118	1.55507e-21	3.6224e-20
FBgn0015571	alpha-Esterase-3	alpha-Est3	CG1257	3R	1878	808.539	0.64395	0.0677252	9.50827	1.93861e-21	4.50824e-20
FBgn0033519	-	CG11825	CG11825	2R	1218	327.099	2.09456	0.22065	9.4927	2.25118e-21	5.21762e-20
FBgn0001297	kayak	kay	CG33956	3R	4574	13339.4	0.910367	0.0959226	9.49064	2.29624e-21	5.31317e-20
FBgn0052572	-	CG32572	CG32572	X	2264	44.0863	1.77302	0.186859	9.48857	2.34234e-21	5.41081e-20
FBgn0034356	Phosphoenolpyruvate carboxykinase 2	Pepck2	CG10924	2R	3449	3897.37	2.49271	0.263532	9.45885	3.11351e-21	7.16832e-20
FBgn0002948	no distributive disjunction	nod	CG1763	X	2449	3325.03	1.61781	0.171345	9.44179	3.66471e-21	8.40941e-20
FBgn0000261	Catalase	Cat	CG6871	3L	1993	24378.3	1.04826	0.111256	9.42203	4.42444e-21	1.01026e-19
FBgn0020545	kraken	kraken	CG3943	2L	1320	4990.7	1.59955	0.169797	9.42036	4.49551e-21	1.0248e-19
FBgn0261808	curled	cu	CG31299	3R	2192	3830.26	1.27338	0.135723	9.38214	6.46483e-21	1.45933e-19
FBgn0029736	-	CG4041	CG4041	X	2723	1560.94	0.271158	0.0289689	9.36032	7.94926e-21	1.79149e-19
FBgn0015221	Ferritin 2 light chain homologue	Fer2LCH	CG1469	3R	1443	34099.9	0.704341	0.0753312	9.34993	8.77053e-21	1.97017e-19
FBgn0030770	-	CG13010	CG13010	X	681	68.129	2.68356	0.287202	9.34379	9.29439e-21	2.08447e-19
FBgn0016756	Ubiquitin specific protease 47	Usp47	CG5486	3L	5493	8533.95	0.332276	0.0355686	9.34184	9.46732e-21	2.1164e-19
FBgn0051694	Interferon-related developmental regulator 1	Ifrd1	CG31694	2L	2639	8696.78	1.03535	0.110949	9.33177	1.04114e-20	2.3237e-19
FBgn0030700	-	CG15914	CG15914	X	1422	195.052	0.648741	0.0695308	9.33026	1.05609e-20	2.35329e-19
FBgn0264775	-	CG44013	CG44013	3R	940	6.73714	3.74742	0.401822	9.32608	1.09856e-20	2.44008e-19
FBgn0033397	Cytochrome P450 4p3	Cyp4p3	CG10843	2R	1667	768.965	1.61489	0.173157	9.32619	1.09742e-20	2.44008e-19
FBgn0038582	-	CG7988	CG7988	3R	885	270.671	0.706484	0.0757867	9.32201	1.14161e-20	2.53162e-19
FBgn0037937	48 related 3	Fer3	CG6913	3R	836	103.876	2.10904	0.22639	9.31597	1.20848e-20	2.67565e-19
FBgn0038348	Aldehyde oxidase 2	AOX2	CG18519	3R	3950	134.333	2.5711	0.276052	9.31382	1.23311e-20	2.72583e-19
FBgn0033052	SREBP cleavage activating protein	SCAP	CG33131	2R	5110	6602.97	0.387368	0.0416073	9.31011	1.27701e-20	2.81389e-19
FBgn0029657	-	CG12535	CG12535	X	5934	339.896	1.2033	0.129315	9.30524	1.33685e-20	2.9364e-19
FBgn0263241	Molybdenum cofactor synthesis 1	Mocs1	CG33048	3L	2232	1505.69	0.895043	0.0962177	9.30227	1.37476e-20	3.0149e-19
FBgn0053126	Neural Lazarillo	NLaz	CG33126	2L	1149	4090.18	1.56582	0.168361	9.30038	1.39951e-20	3.06433e-19
FBgn0038020	Glutathione S transferase D9	GstD9	CG10091	3R	786	5335.89	1.98109	0.213221	9.29127	1.52457e-20	3.3329e-19
FBgn0035309	-	CG15879	CG15879	3L	1389	248.261	1.9423	0.209269	9.28132	1.67395e-20	3.65369e-19
FBgn0039498	-	CG17991	CG17991	3R	1064	26.1432	1.64715	0.177762	9.26603	1.93202e-20	4.21034e-19
FBgn0032467	Ubiquitination factor E4B	Ube4B	CG9934	2L	4759	4058.81	0.473688	0.0511712	9.25693	2.10393e-20	4.56345e-19
FBgn0038866	-	CG5810	CG5810	3R	1384	19.78	2.6855	0.290704	9.23792	2.51338e-20	5.41765e-19
FBgn0085285	-	CG34256	CG34256	3L	762	96.9161	1.78679	0.193738	9.22271	2.89671e-20	6.23422e-19
FBgn0036568	ATP synthase, beta subunit-like	ATPsynbetaL	CG5389	3L	2036	9.30372	2.83862	0.307845	9.22094	2.94514e-20	6.32559e-19
FBgn0000083	Annexin B9	AnxB9	CG5730	3R	1457	17381.4	1.23074	0.133704	9.20501	3.41646e-20	7.29618e-19
FBgn0013770	Cysteine proteinase-1	Cp1	CG6692	2R	1662	26420.4	0.989407	0.107494	9.20427	3.44e-20	7.33513e-19
FBgn0040069	vanin-like	vanin-like	CG32754	X	1864	14.2781	3.6803	0.399856	9.20407	3.44629e-20	7.33727e-19
FBgn0030859	-	CG12990	CG12990	X	2330	33.1895	1.68562	0.183241	9.19891	3.61611e-20	7.67523e-19
FBgn0003943	Ubiquitin-63E	Ubi-p63E	CG11624	3L	2759	43808.9	1.00268	0.109005	9.19842	3.63255e-20	7.69835e-19
FBgn0039561	mitoferrin	mfrn	CG4963	3R	3037	5479.08	0.456407	0.049646	9.19324	3.81174e-20	8.06576e-19
FBgn0085249	-	CG34220	CG34220	2R	2387	72.3569	1.07058	0.116516	9.18827	3.99207e-20	8.42163e-19
FBgn0001168	hairy	h	CG6494	3L	2335	3403.51	1.13483	0.123676	9.17578	4.48302e-20	9.42862e-19
FBgn0267408	Aldehyde oxidase 1	AOX1	CG18522	3R	4228	13197.8	1.92496	0.210242	9.15593	5.38909e-20	1.13171e-18
FBgn0038014	-	CG10041	CG10041	3R	976	22.3637	2.68293	0.293037	9.15558	5.4068e-20	1.13371e-18
FBgn0014427	-	CG11899	CG11899	3R	1176	7280.75	1.10514	0.120865	9.14359	6.041e-20	1.26097e-18
FBgn0033853	-	CG6145	CG6145	2R	2260	5352.95	1.07402	0.117483	9.14184	6.1397e-20	1.27772e-18
FBgn0032154	mitochondrial DNA helicase	mtDNA-helicase	CG5924	2L	1965	156.732	0.713425	0.0783461	9.10607	8.5421e-20	1.76707e-18
FBgn0035815	Sensory neuron membrane protein 2	Snmp2	CG7422	3L	2837	1087.83	0.593666	0.0653077	9.09029	9.87747e-20	2.04026e-18
FBgn0038082	UDP-glycosyltransferase family 37 member A2	Ugt37A2	CG5724	3R	1710	55.1805	3.78181	0.416108	9.08852	1.00394e-19	2.06883e-18
FBgn0034312	-	CG10916	CG10916	2R	2057	1398.49	1.46865	0.161596	9.08846	1.00456e-19	2.06883e-18
FBgn0001222	Heat shock factor	Hsf	CG5748	2R	2897	3433.54	0.38352	0.0422019	9.08774	1.01118e-19	2.07936e-18
FBgn0011837	Tis11 zinc finger protein	Tis11	CG4070	X	5015	3869	0.705892	0.0777892	9.07442	1.14281e-19	2.33965e-18
FBgn0001257	Ecdysone-inducible gene L2	ImpL2	CG15009	3L	2355	4790.8	0.938801	0.103532	9.06773	1.21521e-19	2.48053e-18
FBgn0036735	Enhancer of decapping 3	Edc3	CG6311	3L	4062	1576.23	0.34771	0.0383636	9.06352	1.26306e-19	2.57442e-18
FBgn0260388	-	CG42514	CG42514	3L	2150	3882.11	0.869287	0.0959141	9.06319	1.26696e-19	2.57857e-18
FBgn0033926	Activity-regulated cytoskeleton associated protein 1	Arc1	CG12505	2R	2371	25931.6	2.67279	0.294948	9.06191	1.28187e-19	2.60508e-18
FBgn0030638	-	CG11655	CG11655	X	1720	2079.3	0.94946	0.104898	9.05127	1.41312e-19	2.86663e-18
FBgn0086779	steppke	step	CG11628	2L	4776	3429.52	0.379651	0.0419673	9.04634	1.47834e-19	2.99122e-18
FBgn0035078	Thiamine pyrophosphate carrier protein 2	Tpc2	CG2857	2R	2769	53.3617	1.084	0.119839	9.04554	1.48926e-19	3.0089e-18
FBgn0030228	BTB (POZ) domain containing 9	BTBD9	CG1826	X	3400	1674.7	0.250945	0.0277588	9.04023	1.56344e-19	3.14504e-18
FBgn0263597	Accessory gland protein 98AB	Acp98AB	CG43619	3R	175	6.09201	3.5619	0.394487	9.02921	1.72922e-19	3.46845e-18
FBgn0032724	-	CG10428	CG10428	2L	1921	815.834	0.467159	0.0517402	9.02892	1.73369e-19	3.47239e-18
FBgn0031654	Jonah 25Bii	Jon25Bii	CG8869	2L	894	20.3491	4.08596	0.452824	9.02327	1.82561e-19	3.64595e-18
FBgn0030520	Programmed cell death 4	Pdcd4	CG10990	X	3426	10492	0.306658	0.0340122	9.01611	1.94889e-19	3.88656e-18
FBgn0024912	O-6-alkylguanine-DNA alkyltransferase	agt	CG1303	3R	1295	635.34	0.643172	0.0713987	9.00817	2.09528e-19	4.1725e-18
FBgn0026718	1-Acylglycerol-3-phosphate O-acyltransferase 2	Agpat2	CG17608	2L	2065	1792.28	1.0801	0.119984	9.00201	2.21629e-19	4.40715e-18
FBgn0030837	-	CG8661	CG8661	X	677	5.52122	2.85128	0.319161	8.9337	4.11999e-19	8.09973e-18
FBgn0027793	-	CG14787	CG14787	X	870	121.425	2.17573	0.243651	8.92971	4.27127e-19	8.38523e-18
FBgn0000454	Dipeptidase B	Dip-B	CG9285	3R	2047	9374.22	1.67918	0.188061	8.92892	4.30192e-19	8.43347e-18
FBgn0030086	Chaperonin containing TCP1 subunit 2	CCT2	CG7033	X	2121	3168.46	0.650219	0.0728332	8.92751	4.35686e-19	8.5291e-18
FBgn0034454	-	CG15120	CG15120	2R	1070	265.172	1.80107	0.201922	8.9196	4.67977e-19	9.14833e-18
FBgn0085377	-	CG34348	CG34348	X	2190	961.091	0.657931	0.0737744	8.91815	4.74134e-19	9.25564e-18
FBgn0040261	UDP-glycosyltransferase family 37 member E1	Ugt37E1	CG13271	2L	1620	110.894	2.67431	0.300378	8.90312	5.4297e-19	1.05696e-17
FBgn0037926	Elongator complex protein 1	Elp1	CG10535	3R	4312	1331.92	0.290802	0.032665	8.90255	5.45778e-19	1.06094e-17
FBgn0036203	Mucin 68D	Muc68D	CG6004	3L	4802	12.3835	3.09566	0.347756	8.90182	5.49385e-19	1.06645e-17
FBgn0030672	-	CG9281	CG9281	X	3205	5897.66	0.28912	0.0325122	8.89265	5.96678e-19	1.15502e-17
FBgn0032464	Vacuolar H[+] ATPase 68kD subunit 3	Vha68-3	CG5075	2L	2445	9.00636	2.22939	0.250978	8.8828	6.51974e-19	1.25505e-17
FBgn0039492	-	CG6051	CG6051	3R	4494	4094.39	0.309433	0.0348472	8.87971	6.70349e-19	1.28863e-17
FBgn0051659	-	CG31659	CG31659	2L	695	34.8747	2.61702	0.295117	8.86775	7.46404e-19	1.43087e-17
FBgn0010651	Major Facilitator Superfamily Transporter 14	MFS14	CG15095	2R	2999	5993.37	1.33634	0.150736	8.86546	7.61914e-19	1.45858e-17
FBgn0036956	-	CG13813	CG13813	3L	1527	58.4427	1.99002	0.224639	8.85876	8.0913e-19	1.5447e-17
FBgn0039648	-	CG14515	CG14515	3R	639	51.3246	2.13873	0.241495	8.85618	8.2803e-19	1.57861e-17
FBgn0041582	tamo	tamo	CG4057	2R	4162	3434.68	0.350614	0.0396316	8.84684	9.00324e-19	1.70938e-17
FBgn0053017	-	CG33017	CG33017	2R	5479	12.1651	2.32091	0.262777	8.83227	1.02574e-18	1.93953e-17
FBgn0263316	Multidrug resistance protein 4	Mrp4	CG14709	3R	4726	2918.14	1.36459	0.15454	8.82999	1.04685e-18	1.97406e-17
FBgn0036181	Mucin 68Ca	Muc68Ca	CG18331	3L	9524	177.763	2.25696	0.255846	8.82154	1.12901e-18	2.1261e-17
FBgn0266719	staccato	stac	CG34349	3R	3671	1772.01	0.588741	0.0667447	8.8208	1.13645e-18	2.1372e-17
FBgn0034759	-	CG13511	CG13511	2R	2577	43.5369	1.89745	0.215194	8.81737	1.17184e-18	2.20077e-17
FBgn0265784	Cyclic-AMP response element binding protein B	CrebB	CG6103	X	3518	4125.83	0.286191	0.032469	8.81428	1.20452e-18	2.25908e-17
FBgn0267795	Formin-like	Frl	CG32138	3L	5827	4519.37	0.634125	0.071963	8.81182	1.23133e-18	2.30625e-17
FBgn0035917	Z band alternatively spliced PDZ-motif protein 66	Zasp66	CG6416	3L	1793	13431.9	0.817683	0.0928154	8.80978	1.25389e-18	2.34217e-17
FBgn0266410	-	CG45050	CG45050	3R	6468	21729.6	0.485226	0.0550982	8.80658	1.29027e-18	2.40688e-17
FBgn0031977	barrier to autointegration factor	baf	CG7380	2L	1022	1221.09	0.721015	0.0818964	8.80399	1.32037e-18	2.45859e-17
FBgn0031432	Cytochrome P450 309a1	Cyp309a1	CG9964	2L	1997	3493.73	1.91639	0.217692	8.80323	1.32929e-18	2.4697e-17
FBgn0034684	-	CG13501	CG13501	2R	1630	8.78642	2.48464	0.282497	8.79527	1.42706e-18	2.64427e-17
FBgn0031114	cactin	cactin	CG1676	X	2334	883.101	0.355544	0.0404343	8.79312	1.45459e-18	2.69168e-17
FBgn0035049	Matrix metalloproteinase 1	Mmp1	CG4859	2R	3880	2835.44	1.03399	0.117684	8.78612	1.54812e-18	2.85712e-17
FBgn0035263	-	CG12035	CG12035	3L	1258	15.6552	2.89431	0.329529	8.78316	1.5894e-18	2.92939e-17
FBgn0050108	-	CG30108	CG30108	2R	552	114.657	1.11995	0.127563	8.77962	1.64028e-18	3.01916e-17
FBgn0040551	-	CG11686	CG11686	3R	487	965.991	0.845371	0.0965068	8.7597	1.95775e-18	3.57974e-17
FBgn0039402	Vacuolar protein sorting 2	Vps2	CG14542	3R	1248	1783.28	0.529258	0.0604681	8.75269	2.08322e-18	3.79913e-17
FBgn0029909	muscarinic Acetylcholine Receptor, C-type	mAChR-C	CG12796	X	1218	20.8554	2.05654	0.235189	8.74417	2.24658e-18	4.0863e-17
FBgn0004657	myospheroid	mys	CG1560	X	4397	4905.28	0.407614	0.0466372	8.74011	2.32888e-18	4.2249e-17
FBgn0031333	-	CG5561	CG5561	2L	1091	9.42656	3.57468	0.409246	8.73478	2.44127e-18	4.41148e-17
FBgn0003388	shade	shd	CG13478	3L	2985	166.923	1.62636	0.186327	8.72853	2.57999e-18	4.65607e-17
FBgn0052369	-	CG32369	CG32369	3L	5696	3201.25	0.577212	0.0661368	8.72755	2.60242e-18	4.69045e-17
FBgn0050160	-	CG30160	CG30160	2R	844	34.4428	2.59808	0.297696	8.72728	2.60865e-18	4.69557e-17
FBgn0027558	Polypeptide N-Acetylgalactosaminyltransferase 3	Pgant3	CG4445	2R	2884	1177.66	0.394003	0.0451625	8.72412	2.68264e-18	4.82248e-17
FBgn0032264	Lipase 4	Lip4	CG6113	2L	1936	3646.92	1.40472	0.161217	8.71318	2.95476e-18	5.29109e-17
FBgn0051682	Testis EndoG-Like 1	Tengl1	CG31682	2L	1108	15.4283	2.96762	0.340679	8.7109	3.01469e-18	5.39143e-17
FBgn0051072	lysosomal enzyme receptor protein	Lerp	CG31072	3R	3571	6658.22	0.365949	0.042019	8.70915	3.06173e-18	5.4556e-17
FBgn0038973	Phosphatidylethanolamine-binding protein 1	Pebp1	CG18594	3R	646	57.554	2.19791	0.25249	8.70492	3.17809e-18	5.65448e-17
FBgn0262541	-	CG43095	CG43095	3R	554	74.9412	2.49636	0.28681	8.70386	3.20781e-18	5.69273e-17
FBgn0034484	-	CG11044	CG11044	2R	2041	739.778	1.10502	0.126989	8.70169	3.26979e-18	5.79531e-17
FBgn0020620	Related to the N terminus of tre oncogene	RN-tre	CG8085	2R	2980	3527.35	0.2935	0.0337555	8.69487	3.47213e-18	6.13824e-17
FBgn0027929	Nimrod B1	NimB1	CG33119	2L	1289	512.696	1.23326	0.141869	8.69294	3.5319e-18	6.22801e-17
FBgn0045064	brain washing	bwa	CG13969	2L	2269	2227.37	0.334265	0.0384563	8.69208	3.55857e-18	6.26002e-17
FBgn0037741	Telo2 interacting protein 1	Tti1	CG16908	3R	3376	483.399	0.311677	0.0359088	8.67969	3.96849e-18	6.96245e-17
FBgn0032265	-	CG18301	CG18301	2L	1371	33.3816	2.61938	0.302081	8.67112	4.27898e-18	7.47878e-17
FBgn0040262	UDP-glycosyltransferase family 37 member C2	Ugt37C2	CG13270	2L	1799	66.4418	2.67214	0.308717	8.65562	4.9024e-18	8.53609e-17
FBgn0038074	Glycine N-methyltransferase	Gnmt	CG6188	3R	990	14358.9	1.66974	0.193205	8.64232	5.50818e-18	9.55486e-17
FBgn0038039	-	CG5196	CG5196	3R	2023	1543.38	0.505592	0.0585056	8.64177	5.5349e-18	9.58922e-17
FBgn0260758	-	CG42556	CG42556	2L	1332	9.87507	2.12541	0.24596	8.64128	5.55855e-18	9.61816e-17
FBgn0031886	Nuf2	Nuf2	CG8902	2L	1290	31.6912	1.91524	0.221684	8.63951	5.64528e-18	9.7439e-17
FBgn0000052	Phosphoribosylformylglycinamidine synthase	Pfas	CG9127	2L	4337	10503.5	1.4355	0.166223	8.63599	5.82228e-18	1.00369e-16
FBgn0039137	Ecdysteroid phosphate phosphatase	Epp	CG13604	3R	3042	2090.4	0.876953	0.101641	8.62791	6.24854e-18	1.07584e-16
FBgn0042185	Mitochondrial calcium uniporter	MCU	CG18769	3L	3487	1793.91	0.641124	0.0744087	8.61625	6.91838e-18	1.18223e-16
FBgn0034741	-	CG4269	CG4269	2R	1311	359.325	2.0799	0.241465	8.61367	7.07556e-18	1.20624e-16
FBgn0034335	Glutathione S transferase E1	GstE1	CG5164	2R	831	9489.87	2.71975	0.315842	8.61111	7.23577e-18	1.23053e-16
FBgn0034819	-	CG9877	CG9877	2R	388	10.6104	3.39524	0.39515	8.59228	8.5258e-18	1.43931e-16
FBgn0031881	Mitochondrial Magnesium Exporter 1	MME1	CG3476	2L	1245	956.638	1.13611	0.132296	8.58766	8.87612e-18	1.493e-16
FBgn0025608	Fas-associated factor 2	Faf2	CG10372	2L	2279	4247.44	0.262251	0.0305424	8.58646	8.96931e-18	1.50684e-16
FBgn0031930	-	CG7025	CG7025	2L	1350	7.17681	2.8675	0.334181	8.58068	9.43098e-18	1.58249e-16
FBgn0050383	-	CG30383	CG30383	2R	966	8.35208	2.33139	0.271834	8.57652	9.77854e-18	1.63882e-16
FBgn0038016	MBD-R2	MBD-R2	CG10042	3R	3864	2543.42	0.365358	0.0426156	8.57334	1.00524e-17	1.68269e-16
FBgn0029766	-	CG15784	CG15784	X	2956	7023.36	1.66798	0.19461	8.57088	1.02701e-17	1.71706e-16
FBgn0243512	puckered	puc	CG7850	3R	2919	4361.74	0.772407	0.0903665	8.5475	1.25788e-17	2.08812e-16
FBgn0037224	TweedleF	TwdlF	CG14639	3R	1235	7.13267	2.24675	0.262992	8.54305	1.30723e-17	2.16207e-16
FBgn0051956	Polypeptide N-Acetylgalactosaminyltransferase 4	Pgant4	CG31956	2L	2543	87.8718	1.90543	0.223132	8.53948	1.34826e-17	2.22199e-16
FBgn0250815	Jonah 65Aiv	Jon65Aiv	CG6467	3L	904	21.1649	2.69669	0.316018	8.53336	1.42157e-17	2.34003e-16
FBgn0039044	p53	p53	CG33336	3R	2095	509.405	0.477465	0.0559776	8.52958	1.46874e-17	2.4148e-16
FBgn0015789	Rab10	Rab10	CG17060	X	2336	5731.7	0.302291	0.0354495	8.52737	1.49713e-17	2.45856e-16
FBgn0022787	Helicase 89B	Hel89B	CG4261	3R	6481	6178.75	0.377148	0.0442463	8.52383	1.54361e-17	2.52889e-16
FBgn0030148	-	CG3106	CG3106	X	2589	51.182	2.67994	0.314579	8.51914	1.60743e-17	2.62724e-16
FBgn0037539	-	CG10435	CG10435	3R	1822	1357.48	0.307474	0.0361287	8.51053	1.73144e-17	2.82326e-16
FBgn0036666	Tumor susceptibility gene 101	TSG101	CG9712	3L	1757	4245.62	0.223413	0.0262586	8.50819	1.76674e-17	2.87406e-16
FBgn0026702	POP1 ribonuclease P/MRP subunit	Pop1	CG32763	X	2779	207.264	0.7507	0.0883337	8.49846	1.92124e-17	3.11444e-16
FBgn0028509	Centaurin gamma 1A	CenG1A	CG31811	2L	4444	6716.79	0.484602	0.0570353	8.49652	1.95355e-17	3.1631e-16
FBgn0033785	Scaffold protein containing ankyrin repeats and SAM domain	Sans	CG13320	2R	1905	88.8042	1.18167	0.139138	8.49285	2.01631e-17	3.26092e-16
FBgn0039109	-	CG10365	CG10365	3R	1713	2754.11	0.948002	0.111699	8.48712	2.11824e-17	3.42176e-16
FBgn0010015	Calcineurin A1	CanA1	CG1455	3R	3064	527.786	0.682911	0.0804815	8.48531	2.15148e-17	3.47143e-16
FBgn0263118	taxi	tx	CG5441	3R	2411	625.346	0.578041	0.0681364	8.48359	2.18355e-17	3.51908e-16
FBgn0038740	-	CG4562	CG4562	3R	6512	1579.05	0.926935	0.10941	8.47213	2.40954e-17	3.87427e-16
FBgn0031637	mextli	mxt	CG2950	2L	3034	9407.04	0.322996	0.0381864	8.45842	2.71029e-17	4.34273e-16
FBgn0284436	Chaperonin containing TCP1 subunit 8	CCT8	CG8258	2R	1904	2784.23	0.769154	0.0909547	8.45645	2.75641e-17	4.40644e-16
FBgn0027376	rha	rha	CG11908	3R	4288	41.918	1.3535	0.160072	8.4556	2.77654e-17	4.4335e-16
FBgn0035461	nutcracker	ntc	CG10855	3L	1572	704.824	0.780712	0.0923425	8.45453	2.80211e-17	4.46404e-16
FBgn0034758	-	CG13510	CG13510	2R	2577	72.6569	1.8797	0.222378	8.45275	2.8452e-17	4.5275e-16
FBgn0034582	Chitinase 9	Cht9	CG10531	2R	1161	5.69468	2.92705	0.346357	8.45095	2.88951e-17	4.59274e-16
FBgn0040207	katanin 80	kat80	CG13956	X	3285	1536.31	0.27266	0.0322798	8.44677	2.99465e-17	4.74895e-16
FBgn0011705	rolling stone	rost	CG9552	2L	1613	830.593	1.63127	0.193219	8.4426	3.10353e-17	4.91038e-16
FBgn0030319	-	CG2533	CG2533	X	772	22.402	1.52714	0.180885	8.4426	3.10346e-17	4.91038e-16
FBgn0032343	-	CG6201	CG6201	2L	2308	769.419	0.631192	0.074843	8.43354	3.3535e-17	5.29983e-16
FBgn0030364	LSM12 homolog a	Lsm12a	CG15735	X	1251	2139.67	0.317162	0.0376229	8.43002	3.45611e-17	5.44957e-16
FBgn0036323	-	CG14118	CG14118	3L	1637	39.3683	1.79503	0.213256	8.41724	3.85449e-17	6.05706e-16
FBgn0039655	-	CG14507	CG14507	3R	1233	52.5961	1.74579	0.207412	8.41698	3.86303e-17	6.06361e-16
FBgn0031501	-	CG17261	CG17261	2L	869	43.2732	1.28574	0.152759	8.41678	3.86968e-17	6.06718e-16
FBgn0022740	HLH54F	HLH54F	CG5005	2R	1078	9.21058	2.57532	0.306396	8.4052	4.2714e-17	6.68944e-16
FBgn0015001	iotaTrypsin	iotaTry	CG7754	2R	818	11.6986	2.34518	0.279061	8.40385	4.32091e-17	6.75173e-16
FBgn0031973	Serpin 28Dc	Spn28Dc	CG7219	2L	1792	2121.94	1.28043	0.152443	8.39942	4.48675e-17	6.9951e-16
FBgn0261998	-	CG42816	CG42816	3L	4777	14.8129	1.94104	0.231098	8.39921	4.49507e-17	7.00018e-16
FBgn0038744	-	CG4733	CG4733	3R	3663	1578.96	0.580239	0.0691009	8.39697	4.5813e-17	7.11848e-16
FBgn0030028	Companion of reaper	Corp	CG10965	X	1216	156.058	1.73367	0.206472	8.39663	4.59494e-17	7.13168e-16
FBgn0032891	Outer segment 5	Oseg5	CG9333	2L	2570	112.904	1.38248	0.164691	8.39439	4.68313e-17	7.25751e-16
FBgn0000395	crossveinless 2	cv-2	CG15671	2R	4329	1428.96	0.76346	0.0909497	8.39431	4.68649e-17	7.25751e-16
FBgn0034493	-	CG8908	CG8908	2R	5102	426.884	2.14884	0.256039	8.39263	4.75399e-17	7.35383e-16
FBgn0033326	-	CG14743	CG14743	2R	1836	4.47483	3.32024	0.395711	8.39057	4.83804e-17	7.46718e-16
FBgn0026015	Topoisomerase 3beta	Top3beta	CG3458	X	3296	2016.61	0.546022	0.0651581	8.37997	5.29422e-17	8.13502e-16
FBgn0039056	Centaurin beta 1A	CenB1A	CG6742	3R	3464	2637.36	0.226801	0.0270719	8.37772	5.39609e-17	8.28237e-16
FBgn0265935	Coronin	coro	CG9446	2R	2890	3597.39	0.348011	0.0415435	8.37703	5.4278e-17	8.32182e-16
FBgn0286204	ichor	ich	CG11966	3R	4569	8.82726	2.5282	0.302115	8.36836	5.84281e-17	8.94821e-16
FBgn0051390	Mediator complex subunit 7	MED7	CG31390	3R	901	901.16	0.662076	0.0791953	8.36003	6.27006e-17	9.57082e-16
FBgn0032138	-	CG4364	CG4364	2L	2124	9824.99	0.50459	0.0603965	8.35461	6.56467e-17	9.9985e-16
FBgn0020642	Lcp65Ac	Lcp65Ac	CG6956	3L	505	179.019	2.66019	0.318474	8.35295	6.65795e-17	1.01294e-15
FBgn0027601	pudgy	pdgy	CG9009	X	3407	10292.5	0.730171	0.0874239	8.35208	6.7074e-17	1.01935e-15
FBgn0040465	Dorsal interacting protein 3	Dlip3	CG12767	2R	1471	1091.77	0.4023	0.0481959	8.34718	6.99129e-17	1.06017e-15
FBgn0259223	-	CG42323	CG42323	X	1333	39.2893	1.66933	0.200034	8.34527	7.10512e-17	1.07508e-15
FBgn0037265	spartin	spartin	CG12001	3R	2130	2356.91	0.766333	0.0918557	8.34279	7.25591e-17	1.0955e-15
FBgn0037915	-	CG6790	CG6790	3R	2783	4.38152	3.2834	0.394047	8.33251	7.91432e-17	1.19101e-15
FBgn0001978	shuttle craft	stc	CG3647	2L	4145	2405.26	0.39608	0.0475502	8.32971	8.1039e-17	1.21559e-15
FBgn0027581	-	CG6191	CG6191	2R	3745	9841.54	0.450413	0.0541149	8.32327	8.55699e-17	1.27939e-15
FBgn0031335	-	CG5565	CG5565	2L	942	15.2642	2.88704	0.346884	8.32278	8.59245e-17	1.28331e-15
FBgn0266431	-	CG45061	CG45061	X	493	29.2071	2.47099	0.296957	8.32105	8.71911e-17	1.29986e-15
FBgn0010246	Myosin 61F	Myo61F	CG9155	3L	3592	258.22	1.34031	0.161076	8.32101	8.72204e-17	1.29986e-15
FBgn0030246	-	CG1582	CG1582	X	4184	1669.15	0.479788	0.0577656	8.30577	9.9172e-17	1.47165e-15
FBgn0001233	Heat shock protein 83	Hsp83	CG1242	3L	2960	52839.7	1.80271	0.217201	8.29972	1.04355e-16	1.54526e-15
FBgn0031939	-	CG13796	CG13796	2L	2765	825.257	0.981473	0.118269	8.29864	1.05306e-16	1.55767e-15
FBgn0026570	-	CG5704	CG5704	3L	1289	669.841	1.40137	0.168899	8.29708	1.06697e-16	1.57657e-15
FBgn0031462	-	CG2964	CG2964	2L	1930	16.648	3.33018	0.401918	8.28571	1.17405e-16	1.73109e-15
FBgn0033224	Nop17 like	Nop17l	CG1553	2R	3831	4337.4	0.524654	0.0633213	8.28559	1.17529e-16	1.73109e-15
FBgn0034196	-	CG15605	CG15605	2R	614	5.2767	3.02893	0.365846	8.27923	1.23969e-16	1.82014e-15
FBgn0033677	-	CG8321	CG8321	2R	1195	2078.33	0.487254	0.0588717	8.27654	1.26806e-16	1.85786e-15
FBgn0035792	-	CG7548	CG7548	3L	678	9.92654	2.23388	0.270233	8.26651	1.37932e-16	2.01873e-15
FBgn0038953	-	CG18596	CG18596	3R	3665	982.732	0.472286	0.0571454	8.26463	1.40123e-16	2.04648e-15
FBgn0033309	Lunapark	Lnpk	CG8735	2R	1944	1655.25	0.48008	0.0581389	8.25746	1.48809e-16	2.16648e-15
FBgn0032800	-	CG10137	CG10137	2L	3227	3286.61	0.364052	0.0440903	8.25697	1.4942e-16	2.17309e-15
FBgn0051606	-	CG31606	CG31606	2L	690	74.4518	2.47822	0.300185	8.25564	1.51085e-16	2.19501e-15
FBgn0086442	mind bomb 2	mib2	CG17492	2L	4164	3934.26	0.267939	0.0324637	8.25348	1.5385e-16	2.23284e-15
FBgn0038299	Serpin 88Eb	Spn88Eb	CG6687	3R	1431	1776.21	1.93602	0.234606	8.2522	1.55508e-16	2.25454e-15
FBgn0035988	-	CG3982	CG3982	3L	1455	90.2465	1.07939	0.130807	8.25178	1.56049e-16	2.26002e-15
FBgn0015793	Rab19	Rab19	CG7062	3L	1062	862.075	0.318756	0.0386429	8.24875	1.60058e-16	2.31566e-15
FBgn0030846	-	CG12992	CG12992	X	1866	40.0164	1.10369	0.133844	8.24606	1.63705e-16	2.36595e-15
FBgn0026378	Rab escort protein	Rep	CG8432	2R	1923	829.941	0.500234	0.0607386	8.23584	1.78296e-16	2.56879e-15
FBgn0003411	sisterless A	sisA	CG1641	X	779	6.73036	3.39871	0.412703	8.23524	1.79191e-16	2.57901e-15
FBgn0010397	Lamin C	LamC	CG10119	2R	2450	2982.83	0.86231	0.104735	8.23329	1.82133e-16	2.61864e-15
FBgn0036007	pathetic	path	CG3424	3L	3122	24814.7	0.659953	0.0802064	8.22818	1.90072e-16	2.72712e-15
FBgn0038419	-	CG14879	CG14879	3R	1842	114.141	1.00422	0.122196	8.2181	2.0676e-16	2.96349e-15
FBgn0040294	Plenty of SH3s	POSH	CG4909	2R	3169	777.158	0.307772	0.0374854	8.21044	2.20387e-16	3.15554e-15
FBgn0035144	Kahuli	Kah	CG17181	3L	2825	620.294	0.88302	0.107554	8.21001	2.21179e-16	3.16361e-15
FBgn0020248	stem cell tumor	stet	CG33166	3L	2380	118.202	0.84471	0.102912	8.20808	2.24759e-16	3.2115e-15
FBgn0035868	-	CG7194	CG7194	3L	1365	126.874	1.37086	0.167047	8.20646	2.27808e-16	3.24899e-15
FBgn0031498	-	CG17260	CG17260	2L	1383	423.331	0.463184	0.0565348	8.1929	2.55003e-16	3.62869e-15
FBgn0039714	Zinc/iron regulated transporter-related protein 99C	Zip99C	CG7816	3R	1820	3138.48	0.700175	0.0855607	8.18337	2.76007e-16	3.91953e-15
FBgn0046114	Glutamate-cysteine ligase modifier subunit	Gclm	CG4919	3R	1505	8804.51	1.25071	0.152852	8.1825	2.7801e-16	3.94393e-15
FBgn0261477	scruin like at the midline	slim	CG5186	2R	3081	4280.2	0.311274	0.0381291	8.16368	3.24973e-16	4.58669e-15
FBgn0260775	DnaJ-like-60	DnaJ-60	CG42567	2R	1472	315.157	0.506836	0.062105	8.16096	3.32373e-16	4.68159e-15
FBgn0035889	monkey king protein	mkg-p	CG7163	3L	3058	1105.37	0.32162	0.0394461	8.15341	3.53801e-16	4.97836e-15
FBgn0011674	inscuteable	insc	CG11312	2R	3887	714.146	1.36288	0.167223	8.1501	3.63628e-16	5.11145e-15
FBgn0285937	Rab1	Rab1	CG3320	3R	1804	12127.4	0.259289	0.0318325	8.14542	3.77966e-16	5.30223e-15
FBgn0037916	-	CG5342	CG5342	3R	2601	6.10123	3.01658	0.370438	8.14329	3.84671e-16	5.38539e-15
FBgn0033819	-	CG4714	CG4714	2R	2355	77.9493	1.60416	0.197119	8.13804	4.01731e-16	5.61289e-15
FBgn0011818	out at first	oaf	CG9884	2L	3223	1989.42	0.264038	0.0324465	8.13765	4.03037e-16	5.62547e-15
FBgn0025381	rush hour	rush	CG14782	X	2672	4315.4	0.280245	0.0344834	8.12696	4.40205e-16	6.13807e-15
FBgn0026179	schizo	siz	CG32434	3L	5314	9658.12	0.296365	0.0364725	8.12572	4.44728e-16	6.18868e-15
FBgn0032122	-	CG31883	CG31883	2L	1134	13.9773	1.92328	0.236748	8.12374	4.52025e-16	6.28392e-15
FBgn0262524	verrocchio	ver	CG14121	3L	808	169.16	1.294	0.159301	8.12303	4.54691e-16	6.3134e-15
FBgn0003015	oskar	osk	CG10901	3R	2869	30.4739	2.12708	0.261948	8.12027	4.65164e-16	6.44717e-15
FBgn0260972	alicorn	alc	CG8057	2R	1544	6984.72	0.506022	0.0623748	8.1126	4.95468e-16	6.86033e-15
FBgn0037684	Serine racemase	Srr	CG8129	3R	1634	2167.62	1.34709	0.166075	8.11133	5.00676e-16	6.92552e-15
FBgn0262794	-	CG43175	CG43175	3R	593	37.1602	2.87788	0.354808	8.11108	5.0172e-16	6.93305e-15
FBgn0010877	lethal (3) 05822	l(3)05822	CG7129	3R	3277	3179.84	0.336625	0.0416021	8.09155	5.8909e-16	8.11609e-15
FBgn0266672	Secretory 8	Sec8	CG2095	3R	3363	2908.6	0.254961	0.0315191	8.0891	6.01053e-16	8.26448e-15
FBgn0031476	-	CG8813	CG8813	2L	998	51.874	1.44012	0.178037	8.08886	6.02244e-16	8.27265e-15
FBgn0033845	mars	mars	CG17064	2R	4465	271.12	0.558841	0.0690947	8.08803	6.06362e-16	8.31654e-15
FBgn0085261	-	CG34232	CG34232	2R	831	132.859	1.42281	0.176054	8.08163	6.39062e-16	8.75236e-15
FBgn0085254	-	CG34225	CG34225	2R	590	5.89829	3.55551	0.440533	8.07092	6.97686e-16	9.54583e-15
FBgn0053468	-	CG33468	CG33468	2R	607	87.418	2.14268	0.265513	8.06997	7.03148e-16	9.61108e-15
FBgn0260955	-	CG42587	CG42587	2L	279	4.27157	3.4391	0.42628	8.0677	7.16345e-16	9.78181e-15
FBgn0033499	-	CG12914	CG12914	2R	1253	10.2255	2.37362	0.294529	8.05905	7.68913e-16	1.04687e-14
FBgn0287454	PTIP associated 1	Pa1	CG11750	X	1628	1439.97	0.742467	0.0922181	8.05121	8.19825e-16	1.114e-14
FBgn0266599	Heat shock protein cognate 4	Hsc70-4	CG4264	3R	2368	105588	0.647101	0.0803807	8.05046	8.2483e-16	1.1197e-14
FBgn0029752	Thioredoxin T	TrxT	CG3315	X	1108	41.0436	1.86274	0.231452	8.04806	8.41181e-16	1.14078e-14
FBgn0030484	Glutathione S transferase T4	GstT4	CG1681	X	1220	4403.64	0.853392	0.106115	8.04212	8.82958e-16	1.1951e-14
FBgn0052241	-	CG32241	CG32241	3L	1375	6.5734	2.51656	0.312976	8.04073	8.93033e-16	1.20638e-14
FBgn0001258	Lactate dehydrogenase	Ldh	CG10160	3L	1778	1676.81	1.60424	0.19995	8.02319	1.03036e-15	1.3838e-14
FBgn0032004	-	CG8292	CG8292	2L	1105	33.0563	1.27206	0.15881	8.00997	1.14739e-15	1.53948e-14
FBgn0030761	-	CG9784	CG9784	X	3361	2364.91	0.393409	0.0491344	8.00679	1.1774e-15	1.57821e-14
FBgn0036333	MICAL-like	MICAL-like	CG11259	3L	3357	1804.45	0.293979	0.0367235	8.00519	1.19278e-15	1.59575e-14
FBgn0061469	Ubiquitin protein ligase E3A	Ube3a	CG6190	3L	3674	2094.67	0.294184	0.0367555	8.00381	1.20626e-15	1.60912e-14
FBgn0025634	-	CG13367	CG13367	X	1550	923.944	0.274002	0.0343099	7.98608	1.39301e-15	1.85111e-14
FBgn0026181	Rho kinase	Rok	CG9774	X	7190	2840.76	0.375653	0.0470514	7.9839	1.41786e-15	1.88233e-14
FBgn0010222	NAD-dependent methylenetetrahydrofolate dehydrogenase	Nmdmc	CG18466	3R	1257	5493.47	1.59897	0.200297	7.983	1.42815e-15	1.89236e-14
FBgn0028841	juvenile hormone acid methyltransferase	jhamt	CG17330	2L	1073	172.239	1.81041	0.226825	7.98153	1.44531e-15	1.91328e-14
FBgn0035132	methuselah-like 10	mthl10	CG17061	3L	3020	1674.07	0.592784	0.0742881	7.97952	1.46903e-15	1.94167e-14
FBgn0010197	Guanylyl cyclase at 32E	Gyc32E	CG33114	2L	3844	173.728	0.696184	0.0872946	7.9751	1.52255e-15	2.00785e-14
FBgn0032935	Autophagy-related 18b	Atg18b	CG8678	2L	2435	2971.36	0.493186	0.0618713	7.97116	1.57188e-15	2.06897e-14
FBgn0034470	Odorant-binding protein 56d	Obp56d	CG11218	2R	922	28647.6	0.98081	0.123177	7.96263	1.68419e-15	2.21259e-14
FBgn0011202	diaphanous	dia	CG1768	2L	5260	2442.42	0.393212	0.0493969	7.96025	1.71691e-15	2.25345e-14
FBgn0037116	Amyotrophic lateral sclerosis 2	Als2	CG7158	3L	5063	3397.35	0.225476	0.0283536	7.95227	1.83125e-15	2.39897e-14
FBgn0004687	Myosin light chain cytoplasmic	Mlc-c	CG3201	X	1302	4841.89	0.32851	0.0413304	7.94837	1.88978e-15	2.47097e-14
FBgn0035036	-	CG4707	CG4707	2R	2248	525.183	0.340251	0.0430094	7.91107	2.55187e-15	3.3086e-14
FBgn0030929	-	CG15043	CG15043	X	903	77.215	2.34969	0.297238	7.90508	2.67755e-15	3.46184e-14
FBgn0031117	Glutathione S transferase T3	GstT3	CG1702	X	1369	1011.02	0.941178	0.119254	7.8922	2.96917e-15	3.82105e-14
FBgn0032483	-	CG15482	CG15482	2L	1042	26.5553	2.38942	0.303109	7.88303	3.19531e-15	4.10445e-14
FBgn0035065	-	CG3589	CG3589	2R	1772	890.647	0.666096	0.0845365	7.87939	3.28987e-15	4.222e-14
FBgn0026438	Excitatory amino acid transporter 2	Eaat2	CG3159	2L	3398	31270.9	0.410988	0.052162	7.87906	3.29841e-15	4.22905e-14
FBgn0015585	Accessory gland protein 63F	Acp63F	CG10852	3L	401	31.3541	1.67163	0.212277	7.87475	3.41438e-15	4.37369e-14
FBgn0027329	Chaperonin containing TCP1 subunit 6	CCT6	CG8231	X	1924	2684.95	0.490518	0.0624178	7.85862	3.88384e-15	4.96587e-14
FBgn0039010	-	CG4907	CG4907	3R	2919	22.7049	1.7988	0.228986	7.85548	3.98234e-15	5.07775e-14
FBgn0037341	-	CG12746	CG12746	3R	1509	2748.99	0.771134	0.0982449	7.8491	4.19027e-15	5.32818e-14
FBgn0010278	Structure specific recognition protein	Ssrp	CG4817	2R	2507	941.923	0.622204	0.0792866	7.84753	4.24305e-15	5.38541e-14
FBgn0027572	acyl-CoA oxidase 1	ACOX1	CG5009	2R	2506	8123.09	0.840713	0.107182	7.84378	4.372e-15	5.544e-14
FBgn0035697	-	CG10163	CG10163	3L	1220	10.8055	3.15728	0.402774	7.83885	4.54683e-15	5.75517e-14
FBgn0037378	Proteasome assembly chaperone 1	PSMG1	CG2046	3R	893	738.17	0.608519	0.0776362	7.83808	4.57472e-15	5.78519e-14
FBgn0036931	-	CG14183	CG14183	3L	2712	146.902	1.04827	0.133751	7.83747	4.59731e-15	5.80845e-14
FBgn0027073	UDP-glycosyltransferase family 49 member B1	Ugt49B1	CG4302	2R	1754	4457.87	0.952011	0.121485	7.83643	4.63548e-15	5.85134e-14
FBgn0031038	Tyler	Tyler	CG14208	X	3255	167.479	0.566843	0.0723683	7.83275	4.77319e-15	6.01422e-14
FBgn0045073	Stromal interaction molecule	Stim	CG9126	X	2319	4454.42	0.388965	0.0497957	7.81122	5.66361e-15	7.11029e-14
FBgn0266486	-	CG45085	CG45085	2R	2926	835.62	0.470212	0.0602497	7.80438	5.97942e-15	7.4932e-14
FBgn0036318	WW domain binding protein 2	Wbp2	CG11009	3L	1758	9305.87	0.272862	0.0349707	7.80259	6.06492e-15	7.59348e-14
FBgn0038747	Rho GTPase activating protein at 92B	RhoGAP92B	CG4755	3R	3558	2561.45	0.450956	0.0578495	7.79534	6.42334e-15	8.01328e-14
FBgn0040658	-	CG13516	CG13516	2R	1319	351.464	0.889074	0.114098	7.79217	6.58668e-15	8.20229e-14
FBgn0033177	-	CG11141	CG11141	2R	3243	1337.62	0.44641	0.0573136	7.7889	6.75972e-15	8.40267e-14
FBgn0265271	-	CG14717	CG14717	3R	1819	8.42137	2.48632	0.319439	7.78342	7.05895e-15	8.76676e-14
FBgn0034314	no poles	nopo	CG5140	2R	1671	105.708	0.707262	0.090881	7.78228	7.12293e-15	8.8383e-14
FBgn0035996	-	CG3448	CG3448	3L	1028	223.22	0.739789	0.0951082	7.77839	7.34521e-15	9.0897e-14
FBgn0051674	-	CG31674	CG31674	2L	1276	248.34	0.937188	0.120517	7.7764	7.4619e-15	9.22586e-14
FBgn0015803	Rho-type guanine nucleotide exchange factor	RtGEF	CG10043	2L	5284	2487.3	0.317887	0.0409165	7.76916	7.90052e-15	9.75947e-14
FBgn0024227	aurora B	aurB	CG6620	2L	1183	16.3329	1.57733	0.203047	7.7683	7.95437e-15	9.81724e-14
FBgn0031929	-	CG18585	CG18585	2L	1423	7.48132	3.0678	0.395169	7.76326	8.27742e-15	1.02068e-13
FBgn0087013	Karyopherin beta 3	Karybeta3	CG1059	3R	4364	17785.3	0.397311	0.0512098	7.7585	8.59392e-15	1.05877e-13
FBgn0037020	Peroxin 14	Pex14	CG4289	3L	1249	1579.83	0.355835	0.045872	7.75712	8.68818e-15	1.06943e-13
FBgn0261938	RNA polymerase mitochondrial	PolrMT	CG4644	2L	4718	1627.82	0.292337	0.0377358	7.74696	9.41212e-15	1.15546e-13
FBgn0029999	-	CG1575	CG1575	X	2119	385.52	0.6087	0.0785742	7.74681	9.42286e-15	1.15576e-13
FBgn0030660	-	CG8097	CG8097	X	1903	150.094	0.596237	0.076997	7.74364	9.66092e-15	1.18286e-13
FBgn0034878	pita	pita	CG3941	2R	2529	1441.11	0.265766	0.0343222	7.74327	9.68908e-15	1.18527e-13
FBgn0035981	-	CG4452	CG4452	3L	1670	2038.39	0.332012	0.0428896	7.74107	9.8583e-15	1.2049e-13
FBgn0034405	Juvenile hormone epoxide hydrolase 2	Jheh2	CG15102	2R	1926	17934.6	1.34551	0.173894	7.73752	1.01373e-14	1.23791e-13
FBgn0086358	TAK1-associated binding protein 2	Tab2	CG7417	2R	3305	4165.8	0.514254	0.0665414	7.72833	1.08966e-14	1.32947e-13
FBgn0035209	mitotic spindle density 1	msd1	CG13914	3L	528	14.4502	1.93987	0.251244	7.72109	1.15337e-14	1.40595e-13
FBgn0004360	Wnt oncogene analog 2	Wnt2	CG1916	2R	2240	83.9181	1.17188	0.151806	7.71959	1.16703e-14	1.42136e-13
FBgn0010786	lethal (3) 02640	l(3)02640	CG9165	3L	2556	5096.11	0.823438	0.106697	7.71756	1.18573e-14	1.44172e-13
FBgn0035498	Fermitin 1	Fit1	CG14991	3L	3469	4636.98	0.455617	0.0590826	7.71154	1.24312e-14	1.50873e-13
FBgn0003676	Chaperonin containing TCP1 subunit 1	CCT1	CG5374	3R	1980	2021.79	0.556185	0.0721683	7.70679	1.29026e-14	1.56047e-13
FBgn0034073	-	CG8414	CG8414	2R	3133	522.418	0.516724	0.067143	7.69587	1.40535e-14	1.69523e-13
FBgn0000250	cactus	cact	CG5848	2L	2356	6537.05	0.455251	0.0591761	7.69316	1.43542e-14	1.72999e-13
FBgn0030156	-	CG15247	CG15247	X	2108	575.208	0.85992	0.111779	7.69304	1.43674e-14	1.73008e-13
FBgn0031068	Augmenter of liver regeneration	Alr	CG12534	X	1362	736.875	0.836148	0.108704	7.69196	1.449e-14	1.74333e-13
FBgn0265356	thin	tn	CG15105	2R	5170	6110.72	0.658932	0.0856744	7.69112	1.45849e-14	1.75323e-13
FBgn0031700	-	CG14022	CG14022	2L	652	717.727	1.06086	0.137945	7.69046	1.46605e-14	1.76079e-13
FBgn0085408	Shroom	Shrm	CG34379	2R	5475	2448.18	0.474648	0.0617326	7.68878	1.48548e-14	1.78257e-13
FBgn0283469	Vacuolar protein sorting 4	Vps4	CG6842	X	2411	4296.77	0.212931	0.0276992	7.68724	1.50342e-14	1.80255e-13
FBgn0033202	-	CG1339	CG1339	2R	1415	12.9336	2.55253	0.332214	7.68338	1.54941e-14	1.85448e-13
FBgn0033194	Vacuolar protein sorting 13	Vps13	CG2093	2R	10480	6930.43	0.517855	0.0674006	7.68324	1.55113e-14	1.85493e-13
FBgn0001301	kelch	kel	CG7210	2L	5476	1746.31	0.43926	0.0571775	7.6824	1.5614e-14	1.8656e-13
FBgn0004390	Ras GTPase activating protein 1	RasGAP1	CG6721	3L	5434	2842.43	0.335954	0.0437981	7.67052	1.71302e-14	2.04324e-13
FBgn0033886	Regulatory particle non-ATPase 13	Rpn13	CG13349	2R	1495	3625.94	0.429289	0.0559805	7.66855	1.73957e-14	2.07313e-13
FBgn0038893	Archease	Archease	CG6353	3R	1222	479.606	0.549845	0.0717027	7.6684	1.7415e-14	2.07364e-13
FBgn0037939	-	CG14718	CG14718	3R	2107	10.9347	2.32224	0.303327	7.65589	1.91975e-14	2.27806e-13
FBgn0260049	flare	flr	CG10724	3L	2275	2050.46	0.396885	0.0518476	7.65484	1.93548e-14	2.2928e-13
FBgn0034906	-	CG13561	CG13561	2R	531	3.05955	3.12476	0.408467	7.64997	2.01031e-14	2.37941e-13
FBgn0260756	-	CG42554	CG42554	3L	1023	708.626	0.633873	0.0828759	7.64846	2.03405e-14	2.40545e-13
FBgn0033918	-	CG8531	CG8531	2R	2001	1951.55	0.242425	0.0317116	7.64467	2.09485e-14	2.47313e-13
FBgn0030653	-	CG7860	CG7860	X	1377	153.566	1.48637	0.19445	7.64393	2.10692e-14	2.48527e-13
FBgn0250746	Proteasome beta7 subunit	Prosbeta7	CG12000	3R	1215	3594.65	0.48527	0.0634932	7.64287	2.1244e-14	2.50375e-13
FBgn0262948	-	CG43267	CG43267	2R	358	14.7199	2.38296	0.312112	7.63496	2.25899e-14	2.65786e-13
FBgn0034372	GDI interacting protein 3	Gint3	CG5469	2R	2399	3606.95	0.246884	0.0323401	7.63401	2.27556e-14	2.67509e-13
FBgn0020416	Imaginal disc growth factor 1	Idgf1	CG4472	2L	1445	3272.56	0.8176	0.107229	7.62479	2.44423e-14	2.86365e-13
FBgn0033133	Tetraspanin 42Ek	Tsp42Ek	CG12841	2R	1203	1275.05	0.902788	0.118468	7.62051	2.52684e-14	2.95793e-13
FBgn0028990	Serpin 27A	Spn27A	CG11331	2L	2283	3652.15	0.841796	0.110542	7.61518	2.63332e-14	3.07738e-13
FBgn0259977	Tyrosine decarboxylase 1	Tdc1	CG30445	2R	2281	655.925	1.04811	0.137732	7.6098	2.74513e-14	3.20266e-13
FBgn0052594	ben	be	CG32594	X	4014	1521.62	0.52333	0.0687912	7.60752	2.7941e-14	3.2543e-13
FBgn0034647	poor Imd response upon knock-in	pirk	CG15678	2R	1846	408.199	1.21804	0.160352	7.59603	3.05348e-14	3.54746e-13
FBgn0040705	NADH dehydrogenase (ubiquinone) B8 subunit	ND-B8	CG15434	2L	460	12.9521	2.03823	0.268336	7.59579	3.05922e-14	3.55116e-13
FBgn0036030	Phosphoribosyl pyrophosphate synthetase	Prps	CG6767	3L	2163	15768.7	0.639491	0.0842314	7.59208	3.14802e-14	3.64508e-13
FBgn0030360	-	CG1806	CG1806	X	1648	813.901	0.454721	0.0599403	7.58624	3.29323e-14	3.80685e-13
FBgn0043533	Odorant-binding protein 56f	Obp56f	CG30450	2R	528	21.2022	2.41281	0.318192	7.58288	3.37963e-14	3.90023e-13
FBgn0013305	N-methyl-D-aspartate receptor-associated protein	Nmda1	CG3798	2R	2118	16358	0.393048	0.0519478	7.5662	3.84289e-14	4.40549e-13
FBgn0002564	Larval serum protein 1 gamma	Lsp1gamma	CG6821	3L	2501	44.3145	2.56894	0.339577	7.56511	3.87527e-14	4.43894e-13
FBgn0052179	Keren	Krn	CG32179	3L	1354	1209.97	0.363247	0.0480311	7.56276	3.94613e-14	4.51637e-13
FBgn0263593	Lipin	Lpin	CG8709	2R	4461	18710.5	0.453648	0.0600224	7.55797	4.0941e-14	4.67801e-13
FBgn0038796	eukaryotic translation initiation factor 3 subunit g2	eIF3g2	CG10881	3R	979	7.38781	2.49004	0.329854	7.54892	4.38888e-14	4.99834e-13
FBgn0031190	-	CG12576	CG12576	X	2547	4608.68	0.649368	0.0861568	7.53705	4.80721e-14	5.46578e-13
FBgn0085480	-	CG34451	CG34451	3L	1254	23.934	1.57176	0.20856	7.53626	4.83649e-14	5.49457e-13
FBgn0010044	Glutathione S transferase D8	GstD8	CG4421	3R	808	50.9587	1.40631	0.186642	7.53479	4.89134e-14	5.55233e-13
FBgn0040345	-	CG3708	CG3708	X	1301	20.7109	1.51874	0.201654	7.5314	5.01987e-14	5.68427e-13
FBgn0050154	-	CG30154	CG30154	2R	507	235.324	1.09748	0.145725	7.5312	5.02768e-14	5.68846e-13
FBgn0264693	ensconsin	ens	CG14998	3L	5057	16167.4	0.242801	0.0322596	7.52647	5.21319e-14	5.87915e-13
FBgn0050334	-	CG30334	CG30334	2R	638	31.8432	2.28026	0.30314	7.52213	5.38923e-14	6.06288e-13
FBgn0052512	-	CG32512	CG32512	X	2322	1469.19	0.863105	0.114928	7.50999	5.91307e-14	6.64142e-13
FBgn0035850	Autophagy-related 18a	Atg18a	CG7986	3L	2526	3626.35	0.242868	0.0323525	7.50694	6.0527e-14	6.78726e-13
FBgn0032814	-	CG10366	CG10366	2L	2062	1030.81	0.282037	0.0376769	7.48568	7.11791e-14	7.95598e-13
FBgn0038242	-	CG14852	CG14852	3R	587	5.45068	3.00941	0.402804	7.47116	7.9493e-14	8.87096e-13
FBgn0001229	Heat shock gene 67Bc	Hsp67Bc	CG4190	3L	987	802.921	1.16729	0.156361	7.46534	8.30823e-14	9.26405e-13
FBgn0266758	Extended synaptotagmin-like protein 2	Esyt2	CG6643	3R	3120	5933.84	0.476679	0.0639268	7.45664	8.87598e-14	9.88915e-13
FBgn0086693	inactive	iav	CG4536	X	3512	114.527	1.10775	0.148637	7.45275	9.14173e-14	1.01607e-12
FBgn0052626	AMP deaminase	AMPdeam	CG32626	X	4679	12579.9	0.388732	0.052196	7.44755	9.50865e-14	1.05264e-12
FBgn0030029	-	CG15343	CG15343	X	948	159.824	0.820338	0.110176	7.44572	9.64162e-14	1.06565e-12
FBgn0036450	Tudor domain containing 3	Tdrd3	CG13472	3L	2644	1610.33	0.547163	0.0735008	7.44431	9.7456e-14	1.07629e-12
FBgn0264488	-	CG43896	CG43896	3L	6617	5.97443	3.36424	0.452029	7.44253	9.87758e-14	1.08913e-12
FBgn0260745	midline fasciclin	mfas	CG3359	3R	3163	22871	1.01361	0.136192	7.44253	9.87754e-14	1.08913e-12
FBgn0033137	Tetraspanin 42Ep	Tsp42Ep	CG4471	2R	2892	74.8575	1.07354	0.144303	7.43944	1.01114e-13	1.11225e-12
FBgn0030838	-	CG5445	CG5445	X	2047	2805.44	0.244078	0.0328209	7.43667	1.03255e-13	1.13491e-12
FBgn0025632	-	CG4313	CG4313	X	2157	593.01	0.357372	0.0481282	7.42542	1.12423e-13	1.23469e-12
FBgn0004374	nebbish	neb	CG10718	2L	3592	187.374	1.22949	0.165822	7.41448	1.22099e-13	1.3399e-12
FBgn0004066	Proteasome alpha4 subunit	Prosalpha4	CG3422	X	1176	2566.58	0.534503	0.0721216	7.41114	1.25219e-13	1.37196e-12
FBgn0032689	-	CG10413	CG10413	2L	4010	3701.44	0.390871	0.0528059	7.40202	1.34124e-13	1.46838e-12
FBgn0042101	-	CG18744	CG18744	3R	1336	12.3697	2.46314	0.332878	7.39954	1.3666e-13	1.49496e-12
FBgn0035273	-	CG12020	CG12020	3L	1242	3.10333	2.85571	0.38686	7.38177	1.56197e-13	1.7033e-12
FBgn0033317	-	CG8635	CG8635	2R	1572	1656.05	0.311636	0.042228	7.37983	1.58494e-13	1.72699e-12
FBgn0031244	-	CG11601	CG11601	2L	1378	1181.6	0.388684	0.05272	7.37261	1.67321e-13	1.82031e-12
FBgn0032105	borealin-related	borr	CG4454	2L	1298	15.2646	1.76182	0.23919	7.36579	1.76099e-13	1.9128e-12
FBgn0085329	-	CG34300	CG34300	3R	635	8.14431	2.13645	0.290144	7.36343	1.7925e-13	1.94398e-12
FBgn0036805	Charged multivesicular body protein 1	Chmp1	CG4108	3L	1096	3126.01	0.464281	0.0630517	7.36349	1.79157e-13	1.94398e-12
FBgn0029821	-	CG4020	CG4020	X	1886	37.1294	1.64431	0.223459	7.35842	1.86094e-13	2.01348e-12
FBgn0035428	-	CG14960	CG14960	3L	1444	4.58802	2.54873	0.346638	7.35271	1.94225e-13	2.09817e-12
FBgn0031959	spatzle 3	spz3	CG7104	2L	2552	331.939	0.603451	0.0821104	7.34926	1.99309e-13	2.15142e-12
FBgn0026257	caravaggio	cav	CG6219	3R	1776	214.349	0.627959	0.0855035	7.34425	2.06922e-13	2.23012e-12
FBgn0263750	-	CG43675	CG43675	3R	2529	822.872	0.606152	0.0825766	7.34049	2.12817e-13	2.2901e-12
FBgn0052022	-	CG32022	CG32022	3L	938	396.155	0.373316	0.0508728	7.33823	2.16441e-13	2.32729e-12
FBgn0053229	-	CG33229	CG33229	3L	1754	2160.26	0.663951	0.0904799	7.33811	2.16635e-13	2.32757e-12
FBgn0034507	-	CG11192	CG11192	2R	960	12.5073	3.17531	0.432873	7.33543	2.21009e-13	2.37273e-12
FBgn0034997	-	CG3376	CG3376	2R	3522	3968.12	0.713341	0.0972501	7.33512	2.21522e-13	2.37639e-12
FBgn0034258	eukaryotic translation initiation factor 3 subunit c	eIF3c	CG4954	2R	3275	10028.5	0.399002	0.0544875	7.32283	2.42801e-13	2.60264e-12
FBgn0260965	-	CG42588	CG34017	3L	8603	1375.73	0.582358	0.0795417	7.32142	2.45361e-13	2.62805e-12
FBgn0052591	-	CG32591	CG32591	X	1743	69.7174	1.23278	0.168561	7.31357	2.60137e-13	2.78202e-12
FBgn0051320	HEAT repeat containing 2	HEATR2	CG31320	3R	3431	147.659	0.86501	0.11828	7.31326	2.60745e-13	2.78637e-12
FBgn0037899	Ribosomal protein L24-like	RpL24-like	CG6764	3R	773	8529.15	0.525131	0.0719094	7.30267	2.82115e-13	3.00547e-12
FBgn0010053	Juvenile hormone epoxide hydrolase 1	Jheh1	CG15101	2R	1486	18691.1	1.54754	0.212108	7.29602	2.96413e-13	3.15294e-12
FBgn0032061	-	CG9314	CG9314	2L	1893	43.4829	1.6547	0.226875	7.29345	3.02119e-13	3.21117e-12
FBgn0037554	DNA polymerase iota	PolI	CG7602	3R	3144	886.089	0.436111	0.0597984	7.29302	3.03089e-13	3.21902e-12
FBgn0001967	Nimrod C3	NimC3	CG16880	2L	852	14.3381	1.98286	0.271926	7.2919	3.05624e-13	3.24097e-12
FBgn0010303	hemipterous	hep	CG4353	X	5689	4016.08	0.32123	0.0440586	7.29097	3.07722e-13	3.25823e-12
FBgn0051099	-	CG31099	CG31099	3R	1401	10.9121	2.02086	0.277286	7.28799	3.14608e-13	3.3286e-12
FBgn0034471	Odorant-binding protein 56e	Obp56e	CG8462	2R	532	3676.02	1.35432	0.185965	7.28267	3.27284e-13	3.46007e-12
FBgn0039167	-	CG17786	CG17786	3R	4088	55.8637	0.865058	0.118882	7.27663	3.42251e-13	3.61279e-12
FBgn0000181	bicaudal	bic	CG3644	2R	1474	19868.4	0.286415	0.039372	7.27461	3.47435e-13	3.66472e-12
FBgn0036950	-	CG6996	CG6996	3L	1828	7.7088	3.2885	0.452249	7.27144	3.55677e-13	3.74596e-12
FBgn0038595	-	CG7142	CG7142	3R	1342	45.6218	1.92642	0.265002	7.26945	3.60953e-13	3.79864e-12
FBgn0015277	Phosphatidylinositol 3-kinase 59F	Pi3K59F	CG5373	2R	3164	2085.98	0.39722	0.0546674	7.26612	3.69947e-13	3.88739e-12
FBgn0034728	rad50	rad50	CG6339	2R	4068	1165.79	0.703712	0.0968738	7.26421	3.75215e-13	3.93678e-12
FBgn0030678	-	CG11679	CG11679	X	1462	449.243	0.547328	0.075353	7.26353	3.77126e-13	3.95383e-12
FBgn0032702	-	CG10376	CG10376	2L	2500	1721.19	0.422427	0.0582135	7.25652	3.97168e-13	4.1592e-12
FBgn0024321	NK7.1	NK7.1	CG8524	3R	3540	2007.81	0.277955	0.0383044	7.25647	3.97315e-13	4.1592e-12
FBgn0015376	cutlet	cutlet	CG33122	2L	3236	161.427	1.34161	0.184927	7.25481	4.02218e-13	4.20418e-12
FBgn0031251	-	CG4213	CG4213	2L	4436	579.538	0.883564	0.121899	7.24834	4.21899e-13	4.40325e-12
FBgn0051542	-	CG31542	CG31542	3R	1803	6.68085	2.1035	0.290278	7.24651	4.27637e-13	4.45978e-12
FBgn0029833	Malignant T cell amplified sequence 1	MCTS1	CG5941	X	1245	1078.4	0.26536	0.0366256	7.24522	4.31749e-13	4.4959e-12
FBgn0262787	-	CG43168	CG43168	3L	1078	3.27347	2.67562	0.369443	7.24231	4.41112e-13	4.58307e-12
FBgn0051004	mesh	mesh	CG31004	3R	4803	59.7452	1.39742	0.192985	7.24108	4.45115e-13	4.6212e-12
FBgn0030318	rhomboid-4	rho-4	CG1697	X	2345	2161.6	0.500884	0.0692278	7.23531	4.64482e-13	4.81505e-12
FBgn0052528	parvin	parvin	CG32528	X	1840	3407.29	0.396452	0.0548793	7.22407	5.04539e-13	5.2147e-12
FBgn0037327	pancreatic eIF-2alpha kinase	PEK	CG2087	3R	4639	3174.63	0.444886	0.0615884	7.22355	5.06479e-13	5.22439e-12
FBgn0051053	nenya	nenya	CG31053	3R	818	88.3208	0.962777	0.133373	7.2187	5.24852e-13	5.40048e-12
FBgn0000152	Abnormal X segregation	Axs	CG9703	X	2575	736.883	0.532415	0.0738818	7.20631	5.74891e-13	5.89349e-12
FBgn0053469	-	CG33469	CG33469	2R	651	37.5865	1.39851	0.194083	7.20574	5.7731e-13	5.9139e-12
FBgn0283499	Insulin-like receptor	InR	CG18402	3R	10706	4253.95	1.44875	0.201206	7.20031	6.00739e-13	6.14483e-12
FBgn0037882	-	CG17187	CG17187	3R	1263	383.137	0.595282	0.0827605	7.19283	6.34622e-13	6.48662e-12
FBgn0039244	-	CG11069	CG11069	3R	2038	463	0.650705	0.0904714	7.19239	6.36692e-13	6.50293e-12
FBgn0038194	Cytochrome P450 6d5	Cyp6d5	CG3050	3R	1640	24969.5	1.50856	0.20996	7.185	6.72049e-13	6.84897e-12
FBgn0031143	-	CG1532	CG1532	X	1236	1671.93	0.825435	0.115047	7.17477	7.24265e-13	7.37569e-12
FBgn0032219	-	CG4995	CG4995	2L	1431	7.86154	1.97499	0.27532	7.17343	7.31439e-13	7.44328e-12
FBgn0025456	Cellular Repressor of E1A-stimulated Genes	CREG	CG5413	3R	967	2140.01	0.849647	0.118509	7.16945	7.53003e-13	7.6571e-12
FBgn0052971	-	CG32971	CG32971	2L	810	8.09109	2.38395	0.332528	7.16918	7.54483e-13	7.66652e-12
FBgn0034159	-	CG15615	CG15615	2R	1429	10.393	1.91018	0.26726	7.14728	8.85137e-13	8.97439e-12
FBgn0034907	-	CG5539	CG5539	2R	1334	6.23226	2.36895	0.331643	7.14309	9.12546e-13	9.24553e-12
FBgn0052694	-	CG32694	CG32694	X	3542	3098.48	0.731113	0.102402	7.13965	9.35719e-13	9.46647e-12
FBgn0039310	-	CG11878	CG11878	3R	1345	29.7697	1.994	0.279417	7.13628	9.58881e-13	9.69372e-12
FBgn0035085	-	CG3770	CG3770	2R	1393	142.773	0.652594	0.0914672	7.13473	9.69747e-13	9.79642e-12
FBgn0032170	-	CG4658	CG4658	2L	2486	3254.04	0.225596	0.0316308	7.13215	9.88121e-13	9.97477e-12
FBgn0259678	spaghetti-squash activator	sqa	CG42347	2R	6062	1591.85	0.730451	0.102538	7.12374	1.05036e-12	1.05799e-11
FBgn0001977	Cytokine induced apoptosis inhibitor 1	CIAPIN1	CG4180	2L	2358	2879.32	0.572666	0.0804019	7.12255	1.05947e-12	1.0664e-11
FBgn0050414	-	CG30414	CG30414	2R	1094	82.0031	1.09761	0.154155	7.12018	1.07789e-12	1.08414e-11
FBgn0039509	bigmax	bigmax	CG3350	3R	954	990.415	0.46153	0.064828	7.1193	1.08479e-12	1.09029e-11
FBgn0010220	DEAD box protein 45A	Dbp45A	CG12759	2R	1670	817.876	0.23407	0.0328881	7.11717	1.10165e-12	1.10643e-11
FBgn0037678	-	CG16749	CG16749	3R	873	105.604	1.27128	0.178684	7.11466	1.12187e-12	1.12593e-11
FBgn0051230	-	CG31230	CG31230	3R	416	3.34044	2.68956	0.37806	7.1141	1.12647e-12	1.12973e-11
FBgn0030608	Lipid storage droplet-2	Lsd-2	CG9057	X	4598	22422.7	0.517922	0.07284	7.11041	1.15699e-12	1.15782e-11
FBgn0035513	Cuticular protein 64Ad	Cpr64Ad	CG1259	3L	961	20.2153	1.49763	0.210712	7.10745	1.18203e-12	1.18203e-11
FBgn0030316	-	CG11695	CG11695	X	1800	965.984	0.475645	0.0670103	7.09809	1.26497e-12	1.26315e-11
FBgn0037750	WHAMM and JMY related	Whamy	CG12946	3R	2175	165.972	1.53394	0.216223	7.09424	1.3006e-12	1.29779e-11
FBgn0038981	-	CG5346	CG5346	3R	1921	2017.32	0.543279	0.076675	7.08548	1.38564e-12	1.37868e-11
FBgn0033225	Tubulin tyrosine ligase-like 12	TTLL12	CG1550	2R	1961	1086.65	0.309695	0.0437434	7.07983	1.44334e-12	1.43403e-11
FBgn0027532	-	CG7139	CG7139	3L	3641	2935.65	0.315273	0.0446018	7.06861	1.56491e-12	1.55259e-11
FBgn0028738	Ecdysis triggering hormone	ETH	CG18105	2R	755	27.3882	1.27787	0.180789	7.06832	1.56821e-12	1.55475e-11
FBgn0036974	eukaryotic translation release factor 1	eRF1	CG5605	3L	2321	5863.77	0.221132	0.0313041	7.06399	1.61787e-12	1.60283e-11
FBgn0005659	Ets at 98B	Ets98B	CG5583	3R	3402	2193.28	0.506066	0.071647	7.06332	1.62567e-12	1.60941e-11
FBgn0250785	varicose	vari	CG9326	2L	2717	6467.63	0.436494	0.0618057	7.06236	1.63698e-12	1.61945e-11
FBgn0265001	pickpocket 18	ppk18	CG44152	2L	1662	16.017	2.16949	0.307615	7.0526	1.756e-12	1.73472e-11
FBgn0033240	-	CG2906	CG2906	2R	1591	445.228	0.456892	0.0647894	7.05195	1.76426e-12	1.74164e-11
FBgn0262721	-	CG43165	CG43165	2L	532	119.677	1.51724	0.215192	7.05063	1.78107e-12	1.75698e-11
FBgn0036951	-	CG7017	CG7017	3L	1560	38.7892	3.35984	0.476829	7.04622	1.83847e-12	1.81231e-11
FBgn0034541	-	CG13437	CG13437	2R	782	169.697	1.22544	0.174297	7.03075	2.05421e-12	2.01353e-11
FBgn0037515	Serine protease 7	Sp7	CG3066	3R	1939	2472.84	0.799543	0.11374	7.02959	2.07144e-12	2.02898e-11
FBgn0028894	Glia maturation factor	GMF	CG5869	2L	1019	560.874	0.476247	0.0677514	7.02934	2.07513e-12	2.03116e-11
FBgn0038051	-	CG17207	CG17207	3R	1323	44.2148	1.39337	0.19824	7.0287	2.08471e-12	2.0391e-11
FBgn0022700	Chitinase 4	Cht4	CG3986	2R	1473	5.11053	2.71841	0.386923	7.02572	2.12964e-12	2.07865e-11
FBgn0035208	-	CG9184	CG9184	3L	966	8.23403	2.28439	0.325166	7.02532	2.13575e-12	2.08168e-11
FBgn0034739	-	CG3927	CG3927	2R	1077	33.2741	1.44303	0.205404	7.02533	2.13557e-12	2.08168e-11
FBgn0039424	pickpocket 15	ppk15	CG14239	3R	1452	27.9946	1.61796	0.230464	7.02045	2.2115e-12	2.15098e-11
FBgn0033459	-	CG12744	CG12744	2R	1231	48.9425	1.18677	0.169075	7.0192	2.23149e-12	2.16738e-11
FBgn0029596	-	CG14054	CG14054	X	920	11.1696	1.40872	0.200707	7.01878	2.23819e-12	2.17236e-11
FBgn0263346	smallish	smash	CG43427	3R	7014	14912.4	0.299129	0.0426698	7.01032	2.37776e-12	2.30621e-11
FBgn0031758	Uncoupling protein 4B	Ucp4B	CG18340	2L	1098	8.61386	1.95327	0.278852	7.00468	2.47551e-12	2.39767e-11
FBgn0037632	Chaperonin containing TCP1 subunit 7	CCT7	CG8351	3R	1964	2188.87	0.645176	0.0921088	7.0045	2.47864e-12	2.39902e-11
FBgn0038145	DnaJ-like-2	Droj2	CG8863	3R	2021	22446.2	0.387589	0.0554618	6.98839	2.78049e-12	2.68408e-11
FBgn0051105	pickpocket 22	ppk22	CG31105	3R	1813	51.9555	1.67499	0.239739	6.9867	2.81419e-12	2.71431e-11
FBgn0039154	Niemann-Pick type C-2f	Npc2f	CG6164	3R	712	95.3175	1.25041	0.179033	6.98424	2.86401e-12	2.76044e-11
FBgn0037363	Autophagy-related 17	Atg17	CG1347	3R	6303	5571.4	0.407755	0.0584133	6.98051	2.94104e-12	2.83272e-11
FBgn0037719	bocksbeutel	bocks	CG9424	3R	1535	926.205	0.539702	0.0773226	6.97988	2.95429e-12	2.8435e-11
FBgn0027375	RecQ5 helicase	RecQ5	CG4879	3L	3739	1634.77	0.270034	0.0386944	6.97864	2.98054e-12	2.86678e-11
FBgn0264563	-	CG43935	CG43935	3R	372	13.559	1.7785	0.255022	6.97389	3.08287e-12	2.95699e-11
FBgn0030286	GTPase activating protein and VPS9 domains 1	Gapvd1	CG1657	X	5830	6364.52	0.300433	0.0430797	6.9739	3.08272e-12	2.95699e-11
FBgn0034808	-	CG9896	CG9896	2R	2043	3354.68	0.40847	0.0586658	6.96267	3.33889e-12	3.19372e-11
FBgn0051374	sarcomere length short	sals	CG31374	3R	3419	2217.02	0.513522	0.0737573	6.96233	3.34701e-12	3.19708e-11
FBgn0035824	-	CG8281	CG8281	3L	1301	640.98	0.428599	0.0616207	6.95544	3.5147e-12	3.35032e-11
FBgn0085242	-	CG34213	CG34213	2R	518	186.134	0.703849	0.101229	6.95304	3.57488e-12	3.40535e-11
FBgn0033294	Maltase A4	Mal-A4	CG8693	2R	1786	8.61837	2.55853	0.368069	6.95124	3.62094e-12	3.44449e-11
FBgn0035670	-	CG10472	CG10472	3L	936	108.551	1.54999	0.223107	6.94728	3.72403e-12	3.54013e-11
FBgn0037655	Potassium channel modulatory factor 1	Kcmf1	CG11984	3R	2545	8391.93	0.325112	0.0468221	6.94357	3.82318e-12	3.63189e-11
FBgn0042135	Gdap2	Gdap2	CG18812	2R	3362	17243.2	0.277827	0.0400287	6.9407	3.90174e-12	3.69891e-11
FBgn0050159	-	CG30159	CG30159	2R	1566	1259.22	0.355672	0.051279	6.93602	4.0331e-12	3.81822e-11
FBgn0031747	-	CG9021	CG9021	2L	1382	5.70465	2.23873	0.322914	6.93289	4.12324e-12	3.89823e-11
FBgn0030683	Mevalonate diphosphate decarboxylase	Mvd	CG8239	X	2055	280.663	0.577036	0.0832517	6.93123	4.17212e-12	3.94027e-11
FBgn0034989	-	CG3356	CG3356	2R	3956	3557.81	0.290971	0.0419874	6.92997	4.20925e-12	3.97143e-11
FBgn0060296	painless	pain	CG15860	2R	3041	2213.18	0.601317	0.0868065	6.92709	4.29579e-12	4.04756e-11
FBgn0033464	-	CG1441	CG1441	2R	1866	2745.19	0.874453	0.126294	6.92394	4.39242e-12	4.13019e-11
FBgn0034063	-	CG8389	CG8389	2R	1892	1130.66	1.01818	0.147238	6.91518	4.67261e-12	4.3788e-11
FBgn0033902	eukaryotic translation initiation factor 3 subunit m	eIF3m	CG8309	2R	1590	9402.62	0.329474	0.0476665	6.91207	4.77627e-12	4.47291e-11
FBgn0017429	-	CG5989	CG5989	3L	1567	1318.96	0.264166	0.0382265	6.91055	4.82768e-12	4.51801e-11
FBgn0032717	-	CG10600	CG10600	2L	5295	3323.01	0.271231	0.0392576	6.90899	4.88104e-12	4.56486e-11
FBgn0038611	-	CG14309	CG14309	3R	3341	7.18023	2.16213	0.313083	6.90594	4.98715e-12	4.65781e-11
FBgn0030263	-	CG2076	CG2076	X	1491	4219.99	0.403159	0.0584141	6.90174	5.13699e-12	4.7913e-11
FBgn0010504	kermit	kermit	CG11546	2R	2078	706.379	0.470042	0.0681652	6.89562	5.36293e-12	4.99867e-11
FBgn0030309	-	CG1572	CG1572	X	1245	2781.98	0.69629	0.100995	6.89428	5.41367e-12	5.04257e-11
FBgn0040070	thioredoxin-2	Trx-2	CG31884	2L	1338	9862.5	0.596927	0.0865861	6.89403	5.42352e-12	5.04497e-11
FBgn0038472	-	CG3995	CG3995	3R	1185	370.977	0.301377	0.0437402	6.89017	5.57264e-12	5.1802e-11
FBgn0038838	Turandot B	TotB	CG5609	3R	526	48.14	3.04483	0.442173	6.88605	5.73616e-12	5.32863e-11
FBgn0033644	Trehalose transporter 1-2	Tret1-2	CG8234	2R	1695	253.325	1.37969	0.20069	6.87472	6.21105e-12	5.7582e-11
FBgn0036258	eukaryotic translation initiation factor 3 subunit l	eIF3l	CG5642	3L	1834	11766	0.458425	0.0666873	6.87424	6.23207e-12	5.77383e-11
FBgn0038315	-	CG14866	CG14866	3R	1759	12.5366	1.42362	0.207374	6.86499	6.64955e-12	6.14418e-11
FBgn0030274	l(3)mbt interacting protein 1	Lint-1	CG1908	X	2535	1268.35	0.249941	0.0364146	6.86376	6.70723e-12	6.19335e-11
FBgn0026417	Hus1-like	Hus1-like	CG2525	3R	1169	127.106	0.834508	0.121702	6.857	7.03209e-12	6.48037e-11
FBgn0003719	tolloid	tld	CG6868	3R	3359	404.412	1.60876	0.235106	6.84271	7.77062e-12	7.13723e-11
FBgn0035923	-	CG6511	CG6511	3L	4498	822.999	0.75207	0.11007	6.83265	8.33629e-12	7.65172e-11
FBgn0052479	Ubiquitin specific protease 10	Usp10	CG32479	3L	7873	2989.33	0.308391	0.0451585	6.82909	8.54534e-12	7.83841e-11
FBgn0261975	-	CG42806	CG42806	2R	803	900.211	1.29036	0.189005	6.82709	8.66535e-12	7.94324e-11
FBgn0015572	alpha-Esterase-4	alpha-Est4	CG1082	3R	1749	96.0839	1.01846	0.149184	6.82688	8.67812e-12	7.94969e-11
FBgn0011762	DNA primase subunit 1	Prim1	CG7108	3L	1569	112.763	0.648328	0.0949861	6.82551	8.76128e-12	8.02057e-11
FBgn0046247	-	CG5938	CG5938	3R	1673	2865.38	0.22375	0.0327989	6.82185	8.98728e-12	8.20578e-11
FBgn0042182	-	CG18749	CG18749	3R	3544	735.752	0.33843	0.0496288	6.81922	9.15365e-12	8.352e-11
FBgn0031664	-	CG8892	CG8892	2L	2075	567.976	0.286805	0.0420608	6.81882	9.17937e-12	8.36463e-11
FBgn0043796	-	CG12219	CG12219	X	2018	696.322	0.179023	0.0262575	6.81797	9.23353e-12	8.39742e-11
FBgn0037012	Reduction in Cnn dots 2	Rcd2	CG4786	3L	2245	515.589	0.559565	0.0820853	6.81687	9.3047e-12	8.4566e-11
FBgn0011576	Cytochrome P450 4d2	Cyp4d2	CG3466	X	2467	3193.98	0.845615	0.124235	6.80655	9.9967e-12	9.04402e-11
FBgn0032733	-	CG15170	CG15170	2L	1718	11.0852	2.09571	0.308064	6.80283	1.02581e-11	9.26836e-11
FBgn0037688	-	CG9356	CG9356	3R	1578	866.179	0.245031	0.0360524	6.79653	1.07166e-11	9.67639e-11
FBgn0039711	-	CG7824	CG7824	3R	1229	344.216	0.519006	0.0764086	6.79251	1.10202e-11	9.94405e-11
FBgn0265194	Transient receptor potential cation channel, subfamily M	Trpm	CG44240	2R	7700	5785.1	0.305184	0.0449775	6.78526	1.15879e-11	1.04427e-10
FBgn0038852	Hematopoietically expressed homeobox	HHEX	CG7056	3R	1267	7.84804	2.38897	0.352301	6.78106	1.19299e-11	1.07369e-10
FBgn0004698	Xeroderma pigmentosum, complementation group C	Xpc	CG8153	2R	4683	4053.11	0.249584	0.036806	6.78107	1.1929e-11	1.07369e-10
FBgn0036257	Rho GTPase activating protein at 68F	RhoGAP68F	CG6811	3L	2262	3393.86	0.33129	0.0488566	6.78086	1.1946e-11	1.07444e-10
FBgn0029502	Coenzyme Q7	Coq7	CG14437	X	899	1913.6	0.342037	0.0505068	6.77209	1.26935e-11	1.13872e-10
FBgn0262975	cap-n-collar	cnc	CG43286	3R	6954	11580.1	0.384084	0.0567781	6.76465	1.33634e-11	1.19494e-10
FBgn0025821	inhibitor-t	I-t	CG14719	3R	887	4.60589	2.53388	0.374666	6.76304	1.35129e-11	1.20676e-10
FBgn0030187	-	CG2961	CG2961	X	1871	84.4346	1.40162	0.207295	6.7615	1.36571e-11	1.21885e-10
FBgn0033395	Cytochrome P450 4p2	Cyp4p2	CG1944	2R	1777	560.065	1.64728	0.243648	6.76087	1.37162e-11	1.22334e-10
FBgn0036024	-	CG18180	CG18180	3L	901	26.9711	1.57351	0.23299	6.75353	1.44286e-11	1.28522e-10
FBgn0030332	-	CG9360	CG9360	X	1035	14623.7	1.91435	0.283552	6.75132	1.46505e-11	1.30331e-10
FBgn0029848	Biotinidase	Btnd	CG3599	X	1907	11.2943	1.72289	0.25519	6.75139	1.46432e-11	1.30331e-10
FBgn0039264	-	CG11786	CG11786	3R	768	4.3312	2.19464	0.325432	6.74379	1.54308e-11	1.37009e-10
FBgn0037829	-	CG14691	CG14691	3R	1708	78.1571	3.09207	0.458819	6.7392	1.59266e-11	1.4132e-10
FBgn0035678	-	CG10469	CG10469	3L	1067	193.031	0.702826	0.104311	6.73782	1.60781e-11	1.42573e-10
FBgn0002868	Metallothionein A	MtnA	CG9470	3R	700	21846.1	1.13092	0.167923	6.73472	1.64248e-11	1.45554e-10
FBgn0003261	Rm62	Rm62	CG10279	3R	4362	35397.9	0.21912	0.0325806	6.72547	1.7503e-11	1.54912e-10
FBgn0051267	-	CG31267	CG31267	3R	921	2.29232	3.02097	0.449222	6.72489	1.75728e-11	1.55348e-10
FBgn0036403	-	CG6661	CG6661	3L	1976	9.84892	2.36265	0.351331	6.72487	1.75747e-11	1.55348e-10
FBgn0014031	Alanine-glyoxylate aminotransferase	Agxt	CG3926	X	1410	6165.94	1.07116	0.159366	6.7214	1.79988e-11	1.58995e-10
FBgn0051679	Testis EndoG-Like 3	Tengl3	CG31679	2L	1114	3.28448	3.03008	0.450907	6.71997	1.81766e-11	1.60361e-10
FBgn0033623	-	CG13202	CG13202	2R	426	4.61466	2.21753	0.330046	6.71884	1.83182e-11	1.61508e-10
FBgn0038431	-	CG10405	CG10405	3R	929	10.285	1.81912	0.270759	6.7186	1.83475e-11	1.61663e-10
FBgn0031536	Component of oligomeric golgi complex 3	Cog3	CG3248	2L	2973	1415.27	0.254697	0.0379147	6.71763	1.84705e-11	1.62644e-10
FBgn0002183	dre4	dre4	CG1828	3L	3690	1637.27	0.241836	0.0360033	6.71706	1.85432e-11	1.6318e-10
FBgn0032791	-	CG18094	CG18094	2L	1357	245.992	0.548257	0.0816406	6.7155	1.87424e-11	1.64829e-10
FBgn0036053	calcium-independent phospholipase A2 VIA	iPLA2-VIA	CG6718	3L	3685	4758.06	0.411122	0.0612312	6.71425	1.89031e-11	1.66136e-10
FBgn0262976	leg arista wing complex	lawc	CG32711	X	2632	1495.4	0.450932	0.0672182	6.70848	1.9666e-11	1.72622e-10
FBgn0013548	lethal-(2)-denticleless	l(2)dtl	CG11295	2R	2653	331.782	0.32889	0.0491039	6.69783	2.11535e-11	1.85562e-10
FBgn0037122	-	CG14570	CG14570	3L	780	10.795	1.31083	0.195714	6.69771	2.11717e-11	1.85604e-10
FBgn0030928	-	CG15044	CG15044	X	822	3.3988	3.01892	0.450854	6.69601	2.14189e-11	1.87652e-10
FBgn0038256	-	CG7530	CG7530	3R	2349	3953	0.675074	0.100852	6.69368	2.17631e-11	1.90547e-10
FBgn0031945	-	CG7191	CG7191	2L	1643	367.469	0.429166	0.0641208	6.69308	2.18522e-11	1.91207e-10
FBgn0013772	Cytochrome P450 6a8	Cyp6a8	CG10248	2R	1781	15807.1	2.81174	0.420666	6.68402	2.32477e-11	2.03161e-10
FBgn0036306	-	CG10973	CG10973	3L	1032	621.729	0.570278	0.0853551	6.68123	2.36941e-11	2.06801e-10
FBgn0038241	-	CG8087	CG8087	3R	483	3.60615	2.77622	0.415651	6.6792	2.40255e-11	2.09562e-10
FBgn0065032	Actin-related protein 2/3 complex, subunit 3B	Arpc3B	CG8936	X	783	45.7742	0.916744	0.137277	6.67805	2.42141e-11	2.11074e-10
FBgn0030189	-	CG2909	CG2909	X	2018	726.438	0.659996	0.0990055	6.66626	2.62402e-11	2.28591e-10
FBgn0260935	Vacuolar protein sorting 15	Vps15	CG9746	3R	4239	2193.03	0.217224	0.0325875	6.66587	2.63094e-11	2.2905e-10
FBgn0043458	-	CG12084	CG12084	3L	3483	3969.62	0.239806	0.0359769	6.66556	2.63663e-11	2.29402e-10
FBgn0053057	-	CG33057	CG33057	3L	3110	335.228	0.374303	0.0561569	6.66531	2.64099e-11	2.29637e-10
FBgn0261514	Nimrod A	NimA	CG42282	2L	2877	146.399	1.69994	0.25508	6.66433	2.6587e-11	2.30887e-10
FBgn0032900	-	CG14401	CG14401	2L	1294	1170.37	0.715059	0.107331	6.66216	2.69824e-11	2.34175e-10
FBgn0031322	-	CG5001	CG5001	2L	1893	2240.96	0.334047	0.0502185	6.65187	2.89383e-11	2.50522e-10
FBgn0011692	pavarotti	pav	CG1258	3L	3207	21.4987	2.24472	0.337608	6.6489	2.95295e-11	2.55321e-10
FBgn0032167	-	CG5853	CG5853	2L	2623	4759.69	1.15375	0.17375	6.64027	3.1311e-11	2.69714e-10
FBgn0040064	yippee interacting protein 2	yip2	CG4600	2L	1391	11188.2	0.650921	0.0980664	6.63755	3.18934e-11	2.7456e-10
FBgn0260392	-	CG42518	CG42518	2R	871	1676.83	0.275749	0.0416123	6.62664	3.43412e-11	2.95266e-10
FBgn0032809	-	CG13078	CG13078	2L	910	7.76617	2.11773	0.319688	6.62436	3.48757e-11	2.99676e-10
FBgn0050360	Maltase A6	Mal-A6	CG30360	2R	2291	164.384	1.40112	0.211749	6.61689	3.66833e-11	3.14429e-10
FBgn0014011	Rac2	Rac2	CG8556	3L	2429	2555.92	0.58438	0.0883848	6.61177	3.79743e-11	3.25092e-10
FBgn0053474	-	CG33474	CG33474	2R	1284	141.179	1.3336	0.201731	6.61079	3.82264e-11	3.27048e-10
FBgn0036729	-	CG13733	CG13733	3L	1132	22.4971	1.1733	0.17756	6.60787	3.89881e-11	3.32948e-10
FBgn0260959	Microcephalin	MCPH1	CG42572	2R	3360	1077.24	0.385289	0.0583612	6.6018	4.06188e-11	3.46234e-10
FBgn0033481	-	CG12920	CG12920	2R	1307	10.3647	1.58617	0.240386	6.59842	4.15563e-11	3.54007e-10
FBgn0032961	-	CG1416	CG1416	2L	1644	2909.13	0.649468	0.0984553	6.59657	4.20775e-11	3.58227e-10
FBgn0063494	Glutathione S transferase E6	GstE6	CG17530	2R	751	4084.32	1.36191	0.206622	6.59129	4.36007e-11	3.70968e-10
FBgn0085306	-	CG34277	CG34277	3R	1803	2.50142	2.74196	0.416015	6.591	4.36882e-11	3.71483e-10
FBgn0040670	enhancer of yellow 2b	e(y)2b	CG14612	3R	662	63.7109	0.778352	0.118149	6.58789	4.46122e-11	3.79108e-10
FBgn0030483	-	CG12725	CG12725	X	1025	17.8952	1.73258	0.263151	6.58397	4.58037e-11	3.88995e-10
FBgn0085310	-	CG34281	CG34281	3R	448	2.86391	2.85784	0.434109	6.58323	4.60322e-11	3.90696e-10
FBgn0052832	-	CG32832	CG32832	2L	772	6.17718	2.20764	0.335582	6.57854	4.75079e-11	4.02728e-10
FBgn0034029	eukaryotic translation initiation factor 2B subunit gamma	eIF2Bgamma	CG8190	2R	1548	941.676	0.220443	0.0335142	6.5776	4.78104e-11	4.05044e-10
FBgn0026080	Tat interactive protein 60kDa	Tip60	CG6121	X	2390	909.955	0.249667	0.0379792	6.57378	4.90548e-11	4.15332e-10
FBgn0037653	Iruka	Iru	CG11982	3R	1575	2081.69	0.307452	0.0467924	6.57054	5.01322e-11	4.23936e-10
FBgn0033427	SET and MYND domain containing, class 4, member 1	Smyd4-1	CG1868	2R	2399	506.831	0.355767	0.0541849	6.5658	5.1754e-11	4.36852e-10
FBgn0032388	-	CG6686	CG6686	2L	3192	3055.98	0.287813	0.0438389	6.56525	5.1947e-11	4.38214e-10
FBgn0051233	-	CG31233	CG31233	3R	3059	5.53386	2.50465	0.381564	6.56417	5.23222e-11	4.40842e-10
FBgn0039235	Carbonic anhydrase 4	CAH4	CG10899	3R	972	7.16441	2.17221	0.331597	6.55076	5.72466e-11	4.81455e-10
FBgn0004914	Hepatocyte nuclear factor 4	Hnf4	CG9310	2L	3876	5061.86	0.520809	0.0796058	6.54235	6.05611e-11	5.0779e-10
FBgn0031745	rau	rau	CG8965	2L	2268	179.792	0.822843	0.125807	6.54054	6.1299e-11	5.13667e-10
FBgn0036193	-	CG14135	CG14135	3L	1064	433.149	0.349734	0.0535005	6.53703	6.27523e-11	5.24576e-10
FBgn0010531	Copper chaperone for superoxide dismutase	Ccs	CG17753	2R	959	758.583	0.853018	0.130544	6.53434	6.3891e-11	5.33451e-10
FBgn0034849	-	CG3500	CG3500	2R	948	647.011	0.761589	0.116574	6.53312	6.44149e-11	5.37502e-10
FBgn0050280	-	CG30280	CG30280	2R	1075	17.7822	1.21412	0.185872	6.532	6.48966e-11	5.41195e-10
FBgn0035131	methuselah-like 9	mthl9	CG17084	3L	2133	61.8661	1.0357	0.158621	6.52939	6.60384e-11	5.50386e-10
FBgn0029681	-	CG15239	CG15239	X	1997	11.0195	1.68854	0.258615	6.52915	6.61434e-11	5.5093e-10
FBgn0051551	-	CG31551	CG31551	3R	4182	5.41639	2.21903	0.340175	6.52319	6.88274e-11	5.72598e-10
FBgn0015795	Rab7	Rab7	CG5915	3R	1515	13313.9	0.373054	0.0571951	6.52248	6.91564e-11	5.7499e-10
FBgn0286507	versager	vrs	CG5538	3R	1328	31.3891	1.30566	0.200263	6.51971	7.04444e-11	5.84997e-10
FBgn0037195	-	CG11226	CG11226	3L	1103	56.875	1.13605	0.174421	6.51329	7.35244e-11	6.09478e-10
FBgn0002571	Maltase A3	Mal-A3	CG8695	2R	1795	8.4175	2.26896	0.348456	6.51148	7.44164e-11	6.16504e-10
FBgn0036324	-	CG12520	CG12520	3L	1427	60.7275	1.81025	0.278296	6.50476	7.78188e-11	6.43921e-10
FBgn0037576	Odorant receptor 85a	Or85a	CG7454	3R	1194	1.46512	2.76194	0.424627	6.5044	7.80051e-11	6.44693e-10
FBgn0033128	Tetraspanin 42Eg	Tsp42Eg	CG12142	2R	1188	1174.76	0.570281	0.087722	6.501	7.97893e-11	6.59046e-10
FBgn0030418	-	CG4004	CG4004	X	3403	751.617	0.415414	0.063951	6.49582	8.25826e-11	6.80901e-10
FBgn0050394	-	CG30394	CG30394	2R	3055	1162.48	0.250311	0.0385435	6.49424	8.34512e-11	6.87246e-10
FBgn0033988	parcas	pcs	CG7761	2R	2216	3373.19	0.30539	0.0470318	6.49327	8.39908e-11	6.91278e-10
FBgn0039462	-	CG14252	CG14252	3R	1301	323.484	0.299965	0.0462044	6.49214	8.46228e-11	6.96067e-10
FBgn0015283	Regulatory particle non-ATPase 10	Rpn10	CG7619	3L	1422	3363.15	0.38238	0.0589681	6.48451	8.90201e-11	7.31369e-10
FBgn0032821	Cd GTPase activating protein-related	CdGAPr	CG10538	2L	7824	3737.83	0.306765	0.0473534	6.4782	9.28217e-11	7.61248e-10
FBgn0033124	Tetraspanin 42Ec	Tsp42Ec	CG12847	2R	1025	62.7986	1.27097	0.196537	6.46681	1.00094e-10	8.18689e-10
FBgn0031457	Sorting nexin 21	Snx21	CG3077	2L	2025	1167.37	0.369953	0.0572327	6.46402	1.01959e-10	8.33224e-10
FBgn0027529	tapas	tapas	CG8920	2R	4005	6969.97	0.311399	0.0481949	6.46126	1.03837e-10	8.48077e-10
FBgn0039008	-	CG6972	CG6972	3R	1308	600.786	0.630987	0.097668	6.46053	1.04336e-10	8.51647e-10
FBgn0029882	-	CG3226	CG3226	X	894	1088.39	0.660801	0.102377	6.45457	1.08529e-10	8.8483e-10
FBgn0263864	Death-associated APAF1-related killer	Dark	CG6829	2R	4883	2186.11	0.413263	0.0640848	6.44869	1.12823e-10	9.1876e-10
FBgn0031707	-	CG14020	CG14020	2L	1213	46.5437	1.25214	0.194195	6.44784	1.13459e-10	9.22853e-10
FBgn0052121	-	CG32121	CG32121	3L	2820	279.653	0.707704	0.109817	6.44438	1.1607e-10	9.42433e-10
FBgn0264746	-	CG44004	CG44004	3L	1302	137.804	0.746306	0.116012	6.43299	1.25122e-10	1.01474e-09
FBgn0040336	Seipin	Seipin	CG9904	X	2045	707.469	0.492501	0.0765901	6.43034	1.27318e-10	1.03195e-09
FBgn0283461	Drosomycin	Drs	CG10810	3L	387	1952.57	2.15344	0.335468	6.41923	1.36967e-10	1.10627e-09
FBgn0032596	Proteasome beta4 subunit	Prosbeta4	CG17331	2L	815	1941.33	0.485907	0.0757177	6.41734	1.38673e-10	1.11875e-09
FBgn0031304	TBC1 domain family member 23	TBC1D23	CG4552	2L	2701	3609.23	0.235117	0.0366531	6.41465	1.41148e-10	1.13805e-09
FBgn0050443	Optix-binding protein	Opbp	CG30443	2R	1829	635.592	0.22481	0.0350812	6.40827	1.4718e-10	1.18462e-09
FBgn0037712	-	CG16789	CG16789	3R	2734	716.979	0.531195	0.0829178	6.40629	1.49103e-10	1.1987e-09
FBgn0041205	kenny	key	CG16910	2R	1421	1841.99	0.283771	0.0443665	6.39606	1.59439e-10	1.27958e-09
FBgn0037960	methuselah-like 5	mthl5	CG6965	3R	1952	741.921	0.804033	0.125765	6.39314	1.62512e-10	1.30348e-09
FBgn0036365	combover	cmb	CG10732	3L	5299	2957.45	0.360336	0.0563765	6.3916	1.64162e-10	1.31596e-09
FBgn0259202	-	CG42306	CG42306	2R	2399	505.525	0.273996	0.0428928	6.38791	1.68165e-10	1.34648e-09
FBgn0038250	-	CG3505	CG3505	3R	1185	1478.89	0.656741	0.102812	6.3878	1.68289e-10	1.3467e-09
FBgn0043575	Peptidoglycan recognition protein SC2	PGRP-SC2	CG14745	2R	746	60.3221	1.64166	0.257219	6.38235	1.74394e-10	1.39395e-09
FBgn0037446	Zinc-finger protein	Zif	CG10267	3R	1463	1203.16	0.198057	0.0310571	6.3772	1.80352e-10	1.44073e-09
FBgn0025866	Calpain-B	CalpB	CG8107	3L	4274	3458.07	0.37168	0.0582898	6.37641	1.81282e-10	1.44733e-09
FBgn0033917	SET and MYND domain containing, arthropod-specific, member 1	SmydA-1	CG8503	2R	1774	287.237	0.465011	0.0729278	6.37631	1.81401e-10	1.44745e-09
FBgn0028406	DNA fragmentation factor-related protein 4	Drep4	CG9414	2L	2146	1256.74	0.362524	0.0568929	6.37204	1.86529e-10	1.48665e-09
FBgn0028494	-	CG6424	CG6424	2R	5765	45995.1	0.312774	0.0491549	6.36303	1.97809e-10	1.57384e-09
FBgn0264078	Flotillin 2	Flo2	CG32593	X	3212	5752.08	0.48407	0.0760815	6.36252	1.98469e-10	1.57818e-09
FBgn0033264	Nucleoporin 50kD	Nup50	CG2158	2R	1907	701.473	0.273815	0.0430486	6.36061	2.00951e-10	1.59609e-09
FBgn0028476	Ubiquitin specific protease 1	Usp1	CG15817	3R	4864	4095.67	0.265571	0.0417994	6.35347	2.10513e-10	1.66917e-09
FBgn0022709	Adenylate kinase 1	Ak1	CG17146	3L	1266	3999.54	0.378934	0.0596747	6.34999	2.15331e-10	1.70542e-09
FBgn0085411	-	CG34382	CG34382	3L	3091	10.9613	1.25601	0.197852	6.34823	2.17808e-10	1.72405e-09
FBgn0035165	-	CG13887	CG13887	3L	1446	5557.96	0.442501	0.069725	6.34638	2.20447e-10	1.74395e-09
FBgn0014009	Rab2	Rab2	CG3269	2R	1712	8124.01	0.197795	0.0311763	6.3444	2.23287e-10	1.7644e-09
FBgn0039771	Osiris 23	Osi23	CG15538	3R	853	2.72464	2.58827	0.408198	6.34071	2.28716e-10	1.80524e-09
FBgn0030121	CXXC finger protein 1	Cfp1	CG17446	X	2404	963.222	0.32481	0.0512484	6.33795	2.32844e-10	1.83573e-09
FBgn0035057	-	CG3880	CG3880	2R	1451	22.8247	1.398	0.220585	6.33767	2.3326e-10	1.83797e-09
FBgn0051546	-	CG31546	CG31546	3R	999	79.201	1.87951	0.296631	6.33619	2.35513e-10	1.85361e-09
FBgn0034184	-	CG9646	CG9646	2R	3435	6592.71	0.178256	0.0281347	6.3358	2.36106e-10	1.85633e-09
FBgn0037637	Iron-sulfur cluster assembly enzyme	IscU	CG9836	3R	955	14137.8	0.349027	0.0551229	6.3318	2.42312e-10	1.90388e-09
FBgn0034030	-	CG8192	CG8192	2R	1755	71.3206	0.893772	0.141203	6.32971	2.45621e-10	1.92879e-09
FBgn0003042	Polycomb	Pc	CG32443	3L	2462	1483.74	0.178958	0.0282793	6.32821	2.48028e-10	1.94658e-09
FBgn0005672	spitz	spi	CG10334	2L	1653	5162.34	0.372794	0.0589781	6.32089	2.60061e-10	2.03871e-09
FBgn0051924	-	CG31924	CG31924	2L	819	7.25732	2.79244	0.442067	6.31678	2.67063e-10	2.09242e-09
FBgn0035162	Splicing factor 3b subunit 3	Sf3b3	CG13900	3L	4329	3484.29	0.322381	0.0510369	6.31662	2.67353e-10	2.09351e-09
FBgn0037685	Odorant receptor 85f	Or85f	CG16755	3R	1179	59.1458	0.728513	0.115372	6.3145	2.71043e-10	2.12001e-09
FBgn0260945	Autophagy-related 1	Atg1	CG10967	3L	4088	6639.73	0.251417	0.0398241	6.3132	2.73325e-10	2.13665e-09
FBgn0038638	-	CG7702	CG7702	3R	2404	478.573	1.19083	0.18867	6.31169	2.7601e-10	2.15612e-09
FBgn0034033	-	CG8204	CG8204	2R	735	277.204	0.384394	0.0609035	6.31153	2.76295e-10	2.15622e-09
FBgn0030641	-	CG6299	CG6299	X	2551	2193.79	0.347444	0.0550534	6.31104	2.77171e-10	2.16062e-09
FBgn0052801	-	CG32801	CG32801	X	937	41.5607	0.955647	0.151516	6.30724	2.84059e-10	2.21059e-09
FBgn0033469	-	CG12133	CG12133	2R	1094	2.52536	2.63735	0.418263	6.30548	2.87301e-10	2.23331e-09
FBgn0034816	-	CG3085	CG3085	2R	1749	34.6237	0.852334	0.135312	6.29905	2.99483e-10	2.32149e-09
FBgn0037368	-	CG1239	CG1239	3R	1058	268.301	0.352437	0.0560002	6.2935	3.10391e-10	2.40202e-09
FBgn0054051	-	CG34051	CG34051	2L	771	7.50329	1.96582	0.312607	6.28845	3.20645e-10	2.47999e-09
FBgn0053193	salvador	sav	CG33193	3R	2235	668.753	0.337348	0.0537489	6.27637	3.46563e-10	2.67597e-09
FBgn0040346	-	CG3704	CG3704	X	1515	841.374	0.315753	0.0503441	6.27189	3.56698e-10	2.75116e-09
FBgn0030992	-	CG33253	CG33253	X	2410	21.3271	1.19972	0.191359	6.26944	3.62359e-10	2.79327e-09
FBgn0011703	Ribonucleoside diphosphate reductase large subunit	RnrL	CG5371	2L	2577	190.683	0.540476	0.0862103	6.26927	3.62746e-10	2.7947e-09
FBgn0040305	Metal response element-binding Transcription Factor-1	MTF-1	CG3743	3L	4020	1492.02	0.391892	0.0626237	6.25788	3.90242e-10	2.9982e-09
FBgn0030878	-	CG6769	CG6769	X	1543	1228.91	0.288188	0.0460627	6.25643	3.93881e-10	3.02448e-09
FBgn0025864	Calmodulin-binding protein related to a Rab3 GDP/GTP exchange protein	Crag	CG12737	X	7001	5737.01	0.237729	0.0380037	6.25541	3.96466e-10	3.04265e-09
FBgn0035437	Striatin interacting protein	Strip	CG11526	3L	3792	3008.29	0.261228	0.041771	6.25382	4.00542e-10	3.07222e-09
FBgn0038139	Pyrokinin 2 receptor 2	PK2-R2	CG8795	3R	2912	118.208	0.492342	0.0788702	6.24243	4.30827e-10	3.30086e-09
FBgn0030797	-	CG13004	CG13004	X	2321	359.66	0.425697	0.0681964	6.24223	4.31383e-10	3.30147e-09
FBgn0030855	-	CG5800	CG5800	X	2647	428.482	0.351442	0.0563448	6.23735	4.45051e-10	3.39483e-09
FBgn0065108	pickpocket 16	ppk16	CG34059	2L	3212	28.9417	1.59478	0.255731	6.23614	4.48491e-10	3.41919e-09
FBgn0029092	ced-6	ced-6	CG11804	2R	2572	12524.4	0.440265	0.0706089	6.23526	4.51039e-10	3.43295e-09
FBgn0013811	Dynein heavy chain at 62B	Dhc62B	CG15804	3L	12090	153.274	1.22475	0.196531	6.23183	4.61015e-10	3.50503e-09
FBgn0011596	fuzzy onions	fzo	CG4568	3R	2391	14.0229	1.49367	0.239716	6.23101	4.63423e-10	3.52141e-09
FBgn0261987	Peroxinectin-like	Pxt	CG7660	3R	2716	13.2828	1.43449	0.230288	6.22909	4.69159e-10	3.56108e-09
FBgn0032404	Ribosomal protein L7-like	RpL7-like	CG5317	2L	1771	1610.08	0.325882	0.0523409	6.22614	4.78062e-10	3.62271e-09
FBgn0038114	-	CG11670	CG11670	3R	1418	7.23989	2.08459	0.335076	6.22125	4.93216e-10	3.73346e-09
FBgn0267487	Protein tyrosine phosphatase 61F	Ptp61F	CG9181	3L	5167	3012.36	0.179803	0.0289146	6.21843	5.02144e-10	3.79276e-09
FBgn0034641	mahjong	mahj	CG10080	2R	5346	1589.74	0.233215	0.0375215	6.21551	5.11598e-10	3.85996e-09
FBgn0265630	strawberry notch	sno	CG44436	X	6315	4677.89	0.275924	0.0444005	6.21444	5.15083e-10	3.88203e-09
FBgn0261394	Proteasome alpha3 subunit	Prosalpha3	CG9327	2R	973	3095.3	0.414613	0.0667725	6.20934	5.32093e-10	4.00369e-09
FBgn0013762	Cyclin-dependent kinase 5	Cdk5	CG8203	2R	1604	1284.61	0.210416	0.0339058	6.2059	5.43855e-10	4.08776e-09
FBgn0037350	Diphthamide biosynthesis 4	Dph4	CG2911	3R	974	292.337	0.407468	0.0657164	6.20039	5.63228e-10	4.22878e-09
FBgn0283478	uninitiated	und	CG4008	2L	1748	3845.63	0.358275	0.0578015	6.19837	5.70521e-10	4.28122e-09
FBgn0001565	Helicase	Hlc	CG1666	X	2116	5588.59	0.587328	0.0948407	6.19278	5.9111e-10	4.43093e-09
FBgn0010300	brain tumor	brat	CG10719	2L	12088	3690.25	0.442045	0.0714761	6.18452	6.22911e-10	4.66678e-09
FBgn0261396	Regulatory particle non-ATPase 3	Rpn3	CG42641	2L	1831	3066.54	0.345567	0.0559264	6.17897	6.45221e-10	4.8261e-09
FBgn0025383	-	CG14780	CG14780	X	1082	16.4882	1.11205	0.180018	6.17745	6.51446e-10	4.86478e-09
FBgn0040609	-	CG3348	CG3348	3R	561	1058.06	1.43089	0.231787	6.17332	6.68711e-10	4.98566e-09
FBgn0001285	Jonah 44E	Jon44E	CG8579	2R	1397	41.3429	1.20082	0.194745	6.16613	6.99825e-10	5.20923e-09
FBgn0033783	-	CG17019	CG17019	2R	2865	2235.44	0.234764	0.0380797	6.16505	7.04607e-10	5.242e-09
FBgn0038815	-	CG5466	CG5466	3R	2907	2014.94	0.234828	0.0380948	6.1643	7.07969e-10	5.2635e-09
FBgn0031149	Catalytic subunit 3A of the oligosaccharyltransferase complex	Stt3A	CG1518	X	2755	2575.05	0.232001	0.0376388	6.16388	7.09847e-10	5.27249e-09
FBgn0023175	Proteasome alpha7 subunit	Prosalpha7	CG1519	2R	976	2702.64	0.355071	0.0576068	6.16371	7.10609e-10	5.27533e-09
FBgn0001223	Heat shock protein 22	Hsp22	CG4460	3L	1900	9468.68	2.29902	0.373448	6.15622	7.45035e-10	5.52203e-09
FBgn0042712	HBS1	HBS1	CG1898	3L	2360	1250.2	0.182736	0.0296947	6.1538	7.56468e-10	5.60376e-09
FBgn0052668	-	CG32668	CG32668	X	2676	79.0163	0.629714	0.102367	6.15151	7.6748e-10	5.67927e-09
FBgn0038952	-	CG7069	CG7069	3R	2693	66.477	1.12219	0.182588	6.14602	7.9451e-10	5.86989e-09
FBgn0039537	Hydroxysteroid dehydrogenase like 2	Hsdl2	CG5590	3R	1492	4800.44	0.947467	0.154511	6.13202	8.67709e-10	6.39854e-09
FBgn0030468	-	CG1622	CG1622	X	1987	948.313	0.209625	0.0341856	6.13198	8.67912e-10	6.39854e-09
FBgn0036028	-	CG16717	CG16717	3L	1427	901.869	0.276487	0.0451003	6.13049	8.76101e-10	6.45205e-09
FBgn0003961	Urate oxidase	Uro	CG7171	2L	1262	2.47954	2.72206	0.444032	6.13031	8.77085e-10	6.45587e-09
FBgn0032243	Kinesin-like protein at 31E	Klp31E	CG5300	2L	3846	1096.65	0.183859	0.0299931	6.13003	8.78603e-10	6.4636e-09
FBgn0037206	-	CG12768	CG12768	3L	2214	716.778	0.397519	0.0648588	6.12899	8.84396e-10	6.49588e-09
FBgn0039463	Spag1 axonemal dynein assembly factor	Spag1	CG18472	3R	1625	17.4865	1.81042	0.29547	6.12724	8.94152e-10	6.56059e-09
FBgn0036503	-	CG13454	CG13454	3L	524	3.02385	2.60503	0.425309	6.12503	9.06639e-10	6.64517e-09
FBgn0031088	-	CG15322	CG15322	X	3140	26.4987	1.34307	0.21933	6.12351	9.15343e-10	6.70188e-09
FBgn0005411	U2 small nuclear riboprotein auxiliary factor 50	U2af50	CG9998	X	1527	2826.28	0.175353	0.0286478	6.12097	9.30048e-10	6.80236e-09
FBgn0014388	sprouty	sty	CG1921	3L	4280	3869.03	0.284419	0.0464749	6.11985	9.36619e-10	6.8468e-09
FBgn0033130	Tetraspanin 42Ei	Tsp42Ei	CG12843	2R	1304	1221.78	0.567801	0.0928942	6.11234	9.81832e-10	7.16598e-09
FBgn0037877	-	CG6689	CG6689	3R	1909	1310.96	0.234007	0.0383075	6.10865	1.00479e-09	7.32581e-09
FBgn0262364	-	CG43062	CG43062	3R	584	46.2905	1.78578	0.292485	6.10552	1.02465e-09	7.46667e-09
FBgn0033591	-	CG13216	CG13216	2R	888	2.2388	2.82213	0.462324	6.10422	1.03305e-09	7.52393e-09
FBgn0050103	-	CG30103	CG30103	2R	2022	1.9388	2.61264	0.428032	6.10384	1.03547e-09	7.5376e-09
FBgn0051343	-	CG31343	CG31343	3R	3004	11.3933	1.56042	0.255656	6.10357	1.03723e-09	7.54644e-09
FBgn0035661	-	CG10477	CG10477	3L	1361	4.1363	2.0338	0.333352	6.10104	1.05383e-09	7.66322e-09
FBgn0030078	-	CG10970	CG10970	X	1810	65.9499	1.14322	0.187401	6.10041	1.05795e-09	7.6851e-09
FBgn0085294	-	CG34265	CG34265	3L	467	245.848	1.52603	0.250372	6.09505	1.09402e-09	7.92223e-09
FBgn0037051	-	CG10565	CG10565	3L	2538	3267.51	0.208646	0.0342351	6.09451	1.09775e-09	7.94509e-09
FBgn0263030	-	CG43325	CG43325	2R	1229	24.822	0.988707	0.162548	6.08255	1.18283e-09	8.55634e-09
FBgn0032382	Maltase B2	Mal-B2	CG14935	2L	2237	23515.7	1.65231	0.272098	6.07247	1.25961e-09	9.09283e-09
FBgn0032444	Chaperonin containing TCP1 subunit 4	CCT4	CG5525	2L	1916	2412.2	0.521325	0.0858548	6.07217	1.2619e-09	9.09989e-09
FBgn0262141	-	CG42867	CG42867	2R	438	89.0228	1.44245	0.237587	6.07123	1.26932e-09	9.14861e-09
FBgn0040763	-	CG18336	CG18336	2R	750	73.3965	0.594073	0.0978966	6.06837	1.29218e-09	9.30853e-09
FBgn0034527	-	CG9945	CG9945	2R	1949	1109.73	0.285277	0.0470395	6.06462	1.32265e-09	9.51323e-09
FBgn0051065	pickpocket 31	ppk31	CG31065	3R	1266	20.4764	1.37409	0.226703	6.0612	1.35113e-09	9.70797e-09
FBgn0035169	Dodecenoyl-CoA delta-isomerase	Dci	CG13890	3L	1210	1136	0.676784	0.111708	6.05849	1.37402e-09	9.86218e-09
FBgn0034195	Serpin 53F	Spn53F	CG10956	2R	1279	2.24203	2.38586	0.394135	6.0534	1.41819e-09	1.0174e-08
FBgn0036264	-	CG11529	CG11529	3L	1240	454.247	1.36341	0.225289	6.05183	1.43211e-09	1.02685e-08
FBgn0036287	-	CG10663	CG10663	3L	3174	215.085	0.839968	0.138822	6.05067	1.44248e-09	1.03322e-08
FBgn0024352	Stress induced phosphoprotein 1	Stip1	CG2720	2L	2023	2898.62	0.869831	0.143768	6.05023	1.44637e-09	1.03547e-08
FBgn0028331	lethal (1) G0289	l(1)G0289	CG2221	X	3493	12078.3	0.223312	0.0369187	6.04877	1.4596e-09	1.04386e-08
FBgn0038983	-	CG5326	CG5326	3R	1694	2913.41	0.922032	0.152549	6.04416	1.50195e-09	1.07304e-08
FBgn0033113	Serpin 42Dc	Spn42Dc	CG9455	2R	1621	123.085	0.666038	0.110207	6.04353	1.50782e-09	1.07668e-08
FBgn0039254	Nicotinamide mononucleotide adenylyltransferase	Nmnat	CG13645	3R	1287	1548.16	0.287484	0.0476782	6.02968	1.6428e-09	1.16945e-08
FBgn0265512	mulet	mlt	CG12214	2R	2669	7770.39	0.238778	0.0396028	6.02932	1.64646e-09	1.17146e-08
FBgn0037531	-	CG10445	CG10445	3R	3399	60.552	0.691983	0.114784	6.02858	1.65405e-09	1.17625e-08
FBgn0030964	PDGF- and VEGF-related factor 1	Pvf1	CG7103	X	2783	599.262	0.47943	0.0796592	6.01852	1.76024e-09	1.24792e-08
FBgn0046687	Trapped in endoderm 1	Tre1	CG3171	X	1655	829.708	1.23243	0.204875	6.01554	1.79292e-09	1.26915e-08
FBgn0030850	Stasimon	stas	CG8408	X	2163	3815.73	0.297318	0.0494451	6.0131	1.82009e-09	1.28707e-08
FBgn0036390	-	CG13738	CG13738	3L	355	21.3366	1.00893	0.168033	6.00431	1.92145e-09	1.35704e-08
FBgn0030052	-	CG12065	CG12065	X	2793	4008.29	0.525505	0.0875232	6.00418	1.92296e-09	1.35704e-08
FBgn0067102	Glucosylceramide synthase	GlcT	CG6437	2R	3394	2005.41	0.283736	0.0472558	6.00426	1.92206e-09	1.35704e-08
FBgn0261984	Inositol-requiring enzyme-1	Ire1	CG4583	3R	4034	4602.76	0.364766	0.0609088	5.98872	2.11497e-09	1.48724e-08
FBgn0037677	-	CG12951	CG12951	3R	857	5.63409	1.95312	0.326146	5.9885	2.11787e-09	1.48852e-08
FBgn0036482	-	CG13457	CG13457	3L	3284	4.68348	2.14212	0.357824	5.98652	2.14378e-09	1.50597e-08
FBgn0050484	-	CG30484	CG30484	2R	3274	16.2153	1.61002	0.269144	5.98201	2.20403e-09	1.54751e-08
FBgn0063496	Glutathione S transferase E4	GstE4	CG17525	2R	839	128.115	1.58737	0.265495	5.97891	2.24631e-09	1.5756e-08
FBgn0035632	Bifunctional Phosphopantetheine adenylyltransferase - Dephospho-CoA kinase	Ppat-Dpck	CG10575	3L	1711	985.791	0.528189	0.0883436	5.9788	2.24785e-09	1.57589e-08
FBgn0035926	Acyl-CoA binding protein 5	Acbp5	CG5804	3L	337	7.73927	2.69654	0.45106	5.97823	2.25577e-09	1.58064e-08
FBgn0034733	-	CG4752	CG4752	2R	3995	1879.75	0.867004	0.145082	5.97597	2.28722e-09	1.60105e-08
FBgn0003464	small optic lobes	sol	CG1391	X	5592	7271.83	0.282782	0.0473533	5.97175	2.34722e-09	1.64139e-08
FBgn0035313	-	CG13810	CG13810	3L	1552	2.90657	2.49322	0.417605	5.97028	2.36845e-09	1.65541e-08
FBgn0259748	-	CG42397	CG42397	3L	651	3.16182	2.58995	0.433984	5.96784	2.4041e-09	1.67948e-08
FBgn0050357	-	CG30357	CG30357	2R	1525	126.188	0.9896	0.165893	5.9653	2.44183e-09	1.70497e-08
FBgn0284222	-	CG46306	CG46306	X	2234	306.942	0.399632	0.067068	5.95862	2.54378e-09	1.77348e-08
FBgn0260401	Mediator complex subunit 9	MED9	CG42517	2R	871	264.825	0.274806	0.0461222	5.95821	2.55014e-09	1.77702e-08
FBgn0051231	-	CG31231	CG31231	3R	2241	4.79375	1.78832	0.300282	5.95547	2.5933e-09	1.80528e-08
FBgn0010395	Integrin betanu subunit	Itgbn	CG1762	2L	3340	137.376	1.08816	0.18303	5.94528	2.75991e-09	1.91933e-08
FBgn0051779	Accessory gland protein 24A4	Acp24A4	CG31779	2L	653	11.2014	1.97155	0.331692	5.94391	2.78308e-09	1.93448e-08
FBgn0050281	-	CG30281	CG30281	2R	1007	57.4475	1.22071	0.205495	5.94032	2.84469e-09	1.97532e-08
FBgn0034396	-	CG15097	CG15097	2R	3029	1473.15	0.699894	0.117897	5.93647	2.91217e-09	2.01814e-08
FBgn0051955	-	CG31955	CG31955	2L	900	533.808	1.54976	0.261448	5.92759	3.07406e-09	2.12501e-08
FBgn0063499	Glutathione S transferase E10	GstE10	CG17522	2R	1134	20.577	2.28333	0.385659	5.92058	3.20801e-09	2.21099e-08
FBgn0031650	-	CG14044	CG14044	2L	1318	90.715	0.587151	0.0992669	5.91487	3.32136e-09	2.28797e-08
FBgn0039273	shams	shams	CG9996	3R	1496	435.083	0.375225	0.0634523	5.9135	3.3491e-09	2.30594e-08
FBgn0003660	Synaptobrevin	Syb	CG12210	2R	1139	4178.84	0.327538	0.0553947	5.9128	3.36347e-09	2.31468e-08
FBgn0052280	-	CG32280	CG32280	3L	1440	2493.9	0.33563	0.0567797	5.9111	3.39827e-09	2.33747e-08
FBgn0283479	Alkaline phosphatase 1	Alp1	CG5656	3L	1806	6.37858	2.17427	0.367841	5.9109	3.40244e-09	2.33918e-08
FBgn0000278	Cecropin B	CecB	CG1878	3R	425	14.7819	2.20812	0.373739	5.90818	3.45915e-09	2.37699e-08
FBgn0085452	-	CG34423	CG34423	2R	468	560.344	0.863747	0.146303	5.90384	3.55133e-09	2.43791e-08
FBgn0039849	-	CG11334	CG11334	3R	1516	1267.93	0.675089	0.114364	5.90299	3.56966e-09	2.44928e-08
FBgn0051882	-	CG31882	CG31882	2L	834	7.23781	2.0715	0.351171	5.89883	3.66091e-09	2.50941e-08
FBgn0036341	Syntaxin 13	Syx13	CG11278	3L	1568	2152.35	0.295002	0.0500357	5.89583	3.72804e-09	2.55164e-08
FBgn0039091	-	CG10182	CG10182	3R	2212	5.24378	2.08938	0.354625	5.89181	3.81989e-09	2.61063e-08
FBgn0036364	-	CG14109	CG14109	3L	930	1872.41	0.621801	0.105606	5.88791	3.91109e-09	2.66508e-08
FBgn0031306	-	CG4577	CG4577	2L	2707	27759.4	0.475155	0.080708	5.88734	3.92465e-09	2.673e-08
FBgn0262531	-	CG43085	CG43085	3L	1193	242.232	1.78099	0.302532	5.88695	3.93395e-09	2.67802e-08
FBgn0031885	Menin 1	Mnn1	CG13778	2L	5196	8189.45	0.270165	0.0459379	5.8811	4.07559e-09	2.77308e-08
FBgn0035591	-	CG4611	CG4611	3L	2248	423.72	0.358067	0.0609022	5.87938	4.11815e-09	2.80066e-08
FBgn0032535	Ance-2	Ance-2	CG16869	2L	2222	13.5704	1.89864	0.323048	5.87726	4.17108e-09	2.83388e-08
FBgn0019972	Death related ICE-like caspase	Drice	CG7788	3R	1927	947.251	0.392642	0.0668626	5.87238	4.29589e-09	2.91297e-08
FBgn0266171	-	pre-mod(mdg4)-AB	CG44877	3R	2255	263.37	0.384653	0.0655533	5.86779	4.41639e-09	2.99321e-08
FBgn0038719	-	CG16727	CG16727	3R	2014	2.38703	2.39189	0.407986	5.86269	4.55434e-09	3.0852e-08
FBgn0024491	Bicoid interacting protein 1	Bin1	CG6046	3R	3336	761.014	0.818255	0.139595	5.86162	4.58374e-09	3.1036e-08
FBgn0000079	Amylase proximal	Amy-p	CG18730	2R	1668	4287.24	1.68983	0.288377	5.85978	4.63478e-09	3.13662e-08
FBgn0040817	-	CG14132	CG14132	3L	894	1403.06	0.673511	0.114982	5.85754	4.6978e-09	3.17772e-08
FBgn0031998	Sodium/solute co-transporter-like 5A11	SLC5A11	CG8451	2L	2660	2886.44	0.661283	0.112918	5.85633	4.73195e-09	3.19926e-08
FBgn0039120	Nucleoporin 98-96kD	Nup98-96	CG10198	3R	6624	2941.16	0.176669	0.0302082	5.84837	4.96426e-09	3.34653e-08
FBgn0032715	-	CG17597	CG17597	2L	1758	1571.47	0.662132	0.113253	5.84647	5.02127e-09	3.38167e-08
FBgn0034820	-	CG13538	CG13538	2R	989	1.66422	2.42293	0.414514	5.84523	5.05873e-09	3.40194e-08
FBgn0086519	Cuticular protein 47Eg	Cpr47Eg	CG9070	2R	421	8.50891	1.44618	0.247488	5.84343	5.11371e-09	3.43558e-08
FBgn0040256	UDP-glycosyltransferase family 35 member C1	Ugt35C1	CG6633	3R	1671	6216.05	1.10201	0.188754	5.83833	5.27263e-09	3.53549e-08
FBgn0034382	-	CG18609	CG18609	2R	989	40.0629	2.44035	0.418334	5.8335	5.42779e-09	3.63602e-08
FBgn0032455	PIH1 domain containing 1	Pih1D1	CG5792	2L	3498	2898.34	0.313564	0.0537621	5.83243	5.4625e-09	3.6575e-08
FBgn0086782	amnesiac	amn	CG11937	X	3953	79.6651	0.766923	0.131661	5.825	5.71128e-09	3.82038e-08
FBgn0250843	Proteasome alpha6 subunit	Prosalpha6	CG4904	2L	1070	2044.5	0.41838	0.0718439	5.82345	5.76438e-09	3.85404e-08
FBgn0038956	Carbonic anhydrase 8	CAH8	CG5379	3R	1471	120.387	0.618634	0.106377	5.8155	6.04523e-09	4.03403e-08
FBgn0036147	procollagen lysyl hydroxylase	Plod	CG6199	3L	2630	1372.24	0.463212	0.0796643	5.81455	6.07978e-09	4.05514e-08
FBgn0052117	-	CG32117	CG32117	3L	787	1.5482	2.57436	0.442759	5.81435	6.0869e-09	4.05794e-08
FBgn0035727	-	CG10063	CG10063	3L	827	12.9104	1.66326	0.286119	5.81315	6.13075e-09	4.08324e-08
FBgn0027363	Signal transducing adaptor molecule	Stam	CG6521	2L	2854	4962.94	0.257575	0.0443382	5.80933	6.27249e-09	4.17363e-08
FBgn0031070	-	CG12702	CG12702	X	3461	90.8879	0.872259	0.150231	5.80612	6.39385e-09	4.24827e-08
FBgn0263113	Coiled-coil and C2 domain containing 2A	Cc2d2a	CG43370	2R	4255	39.8207	1.06346	0.183224	5.80416	6.46876e-09	4.29392e-08
FBgn0030774	spheroide	sphe	CG9675	X	1263	37.1317	1.50707	0.260131	5.7935	6.89338e-09	4.55614e-08
FBgn0263235	Phaedra 2	Phae2	CG16997	2L	1147	8.34883	2.18658	0.377531	5.79179	6.9642e-09	4.60076e-08
FBgn0261610	-	CG42699	CG42699	X	4296	1459.98	0.188049	0.0324844	5.78889	7.08529e-09	4.67406e-08
FBgn0039223	-	CG5805	CG5805	3R	2151	2081.85	0.209268	0.0361574	5.78768	7.13652e-09	4.70562e-08
FBgn0030432	-	CG4404	CG4404	X	1696	3016.96	0.321521	0.0555575	5.78718	7.15795e-09	4.71751e-08
FBgn0030642	-	CG15642	CG15642	X	1489	334.72	0.421527	0.072879	5.78393	7.29767e-09	4.8073e-08
FBgn0035770	pastrel	pst	CG8588	3L	2551	10684.3	0.541167	0.0937508	5.7724	7.81519e-09	5.13358e-08
FBgn0032428	-	Fam92	CG6405	2L	1326	156.561	0.848263	0.147069	5.76779	8.03193e-09	5.26597e-08
FBgn0040765	luna	luna	CG33473	2R	8446	1113.1	0.314131	0.0544667	5.76739	8.05082e-09	5.27586e-08
FBgn0035267	-	CG13921	CG13921	3L	5090	2073.92	0.270608	0.0469845	5.75951	8.43591e-09	5.51778e-08
FBgn0041241	Gustatory receptor 47b	Gr47b	CG30030	2R	1381	9.70613	1.52189	0.264323	5.75768	8.52753e-09	5.57507e-08
FBgn0031918	-	CG6055	CG6055	2L	1087	69.0305	1.20285	0.20916	5.75086	8.87902e-09	5.79121e-08
FBgn0031882	Rab30	Rab30	CG9100	2L	2055	1224.46	0.208664	0.0363028	5.74788	9.03707e-09	5.88876e-08
FBgn0001994	cropped	crp	CG7664	2L	4402	5662.97	0.345584	0.0602458	5.73623	9.68057e-09	6.29223e-08
FBgn0050349	-	CG30349	CG30349	2R	2014	826.335	0.257308	0.044857	5.73618	9.68349e-09	6.29223e-08
FBgn0037638	-	CG8379	CG8379	3R	2450	1456.63	0.301063	0.0525161	5.73278	9.87971e-09	6.41071e-08
FBgn0037222	-	CG14642	CG14642	3R	1344	97.6116	1.03976	0.181393	5.73209	9.92028e-09	6.43402e-08
FBgn0031496	-	CG17258	CG17258	2L	2863	49.5775	0.931595	0.162638	5.72803	1.01604e-08	6.58054e-08
FBgn0033302	Cytochrome P450 6a14	Cyp6a14	CG8687	2R	2959	2029.45	0.525118	0.0916742	5.72809	1.01569e-08	6.58054e-08
FBgn0034654	eukaryotic translation initiation factor 3 subunit k	eIF3k	CG10306	2R	853	4900.95	0.373366	0.0652265	5.72415	1.03954e-08	6.72646e-08
FBgn0034215	Methylthioadenosine phosphorylase	Mtap	CG4802	2R	1392	1867.73	0.482778	0.0843696	5.72218	1.05168e-08	6.80178e-08
FBgn0034956	-	CG4324	CG4324	2R	1748	54.9443	0.684661	0.119689	5.72032	1.06323e-08	6.86691e-08
FBgn0052463	Testis EndoG-Like 2	Tengl2	CG32463	2L	1018	2.21082	2.63297	0.4606	5.71639	1.0881e-08	7.02423e-08
FBgn0023180	Origin recognition complex subunit 6	Orc6	CG1584	2R	972	64.7636	0.572484	0.100296	5.70793	1.14356e-08	7.36514e-08
FBgn0033813	fates-shifted	fsd	CG12765	2R	1020	406.614	0.375307	0.0657832	5.70521	1.162e-08	7.48038e-08
FBgn0052529	Histone gene-specific Epigenetic Repressor in late S phase	Hers	CG32529	X	11220	6776.04	0.268756	0.0471318	5.70222	1.18256e-08	7.60926e-08
FBgn0030647	-	CG6324	CG6324	X	3584	3.16197	2.41613	0.423867	5.7002	1.19666e-08	7.68567e-08
FBgn0035685	-	CG13297	CG13297	3L	595	13.4418	1.85112	0.324763	5.6999	1.19878e-08	7.69573e-08
FBgn0032178	Serpin 31A	Spn31A	CG4804	2L	1428	315.383	0.600255	0.10533	5.69878	1.20667e-08	7.73564e-08
FBgn0051410	Niemann-Pick type C-2e	Npc2e	CG31410	3R	661	10.4354	1.49405	0.262505	5.69151	1.2592e-08	8.05376e-08
FBgn0015268	Nucleosome assembly protein 1	Nap1	CG5330	2R	1393	11225.2	0.28302	0.0497563	5.68812	1.28446e-08	8.19641e-08
FBgn0052311	zormin	zormin	CG33484	3L	11516	11022.6	0.385605	0.0677925	5.68802	1.28524e-08	8.19764e-08
FBgn0037030	-	CG3288	CG3288	3L	908	57.7088	1.06867	0.187914	5.68701	1.29284e-08	8.24232e-08
FBgn0002284	Proteasome beta6 subunit	Prosbeta6	CG4097	3L	944	2535.87	0.40644	0.0714998	5.68449	1.31207e-08	8.36103e-08
FBgn0037780	ohgata	ohgt	CG3925	3R	2061	2458.18	0.167196	0.0294135	5.68433	1.31323e-08	8.36462e-08
FBgn0011655	Medea	Med	CG1775	3R	3425	2580.82	0.182404	0.0320903	5.6841	1.31506e-08	8.37241e-08
FBgn0030675	-	CG8191	CG8191	X	1486	196.515	0.345508	0.0607877	5.68386	1.31691e-08	8.38032e-08
FBgn0086134	Proteasome alpha2 subunit	Prosalpha2	CG5266	3R	920	3176.78	0.333223	0.058645	5.68204	1.33097e-08	8.4659e-08
FBgn0054012	-	CG34012	CG34012	3L	551	3.03106	2.1648	0.381476	5.6748	1.38853e-08	8.81584e-08
FBgn0036052	-	CG10809	CG10809	3L	2233	797.189	0.252407	0.0444812	5.67446	1.39125e-08	8.8291e-08
FBgn0036528	-	CG7579	CG7579	3L	1681	2.04994	2.48778	0.43873	5.6704	1.42463e-08	9.03676e-08
FBgn0051874	Fumarase 4	Fum4	CG31874	2L	1623	13.0238	1.47023	0.259309	5.66979	1.4297e-08	9.06477e-08
FBgn0027594	draper	drpr	CG2086	3L	4757	6828.88	0.321988	0.0568005	5.66875	1.43844e-08	9.11603e-08
FBgn0265605	Ras-related protein interacting with calmodulin	Ric	CG8418	2R	2283	11510.7	0.244398	0.0431434	5.66479	1.47207e-08	9.31641e-08
FBgn0263024	-	CG43319	CG43319	3R	224	2.02049	2.38538	0.421382	5.66085	1.50626e-08	9.51107e-08
FBgn0034915	eukaryotic translation initiation factor 6	eIF6	CG17611	2R	1056	832.923	0.514028	0.0908034	5.66089	1.50594e-08	9.51107e-08
FBgn0031468	-	CG2975	CG2975	2L	1884	18.7405	1.20549	0.212957	5.66072	1.50738e-08	9.5138e-08
FBgn0035431	-	CG14968	CG14968	3L	1053	217.093	0.693258	0.12256	5.65647	1.54519e-08	9.73914e-08
FBgn0032452	-	CG15484	CG15484	2L	913	13.1835	0.98886	0.174878	5.65456	1.56245e-08	9.83004e-08
FBgn0011761	deadhead	dhd	CG4193	X	952	2.58019	2.43608	0.431066	5.65129	1.59244e-08	1.00141e-07
FBgn0030749	Annexin B11	AnxB11	CG9968	X	2927	2931.95	0.411189	0.072781	5.64967	1.60753e-08	1.01009e-07
FBgn0037202	Suppressor of stem-loop mutation	Ssl1	CG11115	3L	1713	564.52	0.267366	0.0473245	5.64962	1.60803e-08	1.01009e-07
FBgn0051961	Tubulin-binding cofactor C	TBCC	CG31961	2L	1477	922.786	0.245378	0.0434329	5.64958	1.60842e-08	1.01009e-07
FBgn0019637	Another transcription unit	Atu	CG1433	3R	2351	533.338	0.191882	0.0339786	5.64714	1.63142e-08	1.02407e-07
FBgn0036493	-	CG7255	CG7255	3L	4963	966.432	0.853184	0.151119	5.64579	1.64424e-08	1.03025e-07
FBgn0030918	-	CG15056	CG15056	X	1424	1.99758	2.31347	0.410113	5.64105	1.69015e-08	1.05806e-07
FBgn0029877	-	CG17717	CG17717	X	1092	7.56836	1.44029	0.255476	5.63766	1.72374e-08	1.07763e-07
FBgn0039002	-	CG17625	CG17625	3R	559	15.233	1.44553	0.25666	5.63208	1.7805e-08	1.11161e-07
FBgn0259736	-	CG42390	CG42390	3R	5439	6552.81	0.410789	0.0729825	5.6286	1.81683e-08	1.13378e-07
FBgn0038067	-	CG11598	CG11598	3R	1248	2.30852	1.99603	0.354842	5.62512	1.85382e-08	1.15634e-07
FBgn0033337	-	CG8272	CG8272	2R	2804	798.078	0.211149	0.0375471	5.62357	1.87048e-08	1.16621e-07
FBgn0031757	Ucp4C	Ucp4C	CG9064	2L	1196	2.93869	2.28791	0.407091	5.62016	1.90779e-08	1.18894e-07
FBgn0013767	Corazonin	Crz	CG3302	3R	654	1186.75	0.50531	0.0899144	5.6199	1.91064e-08	1.19018e-07
FBgn0029937	-	CG8300	CG8300	X	1060	1532.64	0.513758	0.0914353	5.61882	1.92267e-08	1.19636e-07
FBgn0034008	-	CG8152	CG8152	2R	1204	331.629	0.261954	0.0466211	5.61878	1.92315e-08	1.19636e-07
FBgn0037518	-	CG2641	CG2641	3R	1510	299.522	0.448044	0.0797574	5.61758	1.93654e-08	1.20361e-07
FBgn0035088	-	CG3776	CG3776	2R	1004	1473.47	0.190991	0.0340005	5.61729	1.93977e-08	1.20507e-07
FBgn0035921	-	CG13305	CG13305	3L	1364	434.484	1.13165	0.201465	5.61708	1.9421e-08	1.20598e-07
FBgn0003321	small bristles	sbr	CG1664	X	3280	5245.31	0.224215	0.0399186	5.6168	1.94528e-08	1.20741e-07
FBgn0035949	-	CG13314	CG13314	3L	789	97.0986	0.994316	0.177189	5.6116	2.00469e-08	1.24262e-07
FBgn0031006	rapamycin-insensitive companion of Tor	rictor	CG8002	X	6612	2736.05	0.194573	0.0346816	5.61026	2.02019e-08	1.25167e-07
FBgn0261016	closca	clos	CG42600	2R	5621	96.179	0.433939	0.0774389	5.60363	2.0991e-08	1.29766e-07
FBgn0034451	tubulin-binding cofactor B	TBCB	CG11242	2R	1166	872.57	0.431645	0.0770334	5.60335	2.1025e-08	1.29918e-07
FBgn0036948	-	CG7298	CG7298	3L	1323	3.08807	2.55754	0.456602	5.60125	2.12817e-08	1.31387e-07
FBgn0039872	salty dog	salt	CG2196	3R	2114	2.22186	2.36499	0.422284	5.60047	2.13771e-08	1.31918e-07
FBgn0035816	-	CG13685	CG13685	3L	3209	2902.83	0.2913	0.0520256	5.59916	2.15392e-08	1.32859e-07
FBgn0031127	-	CG1835	CG1835	X	663	25.974	1.64851	0.294437	5.59886	2.15761e-08	1.32968e-07
FBgn0028984	Serpin 88Ea	Spn88Ea	CG18525	3R	1521	4000.19	0.53358	0.0955626	5.58357	2.35634e-08	1.44703e-07
FBgn0035877	-	CG7083	CG7083	3L	2029	2192.93	0.232138	0.0415745	5.58368	2.35487e-08	1.44703e-07
FBgn0000392	cup	cup	CG11181	2L	4306	218.344	0.377226	0.0675922	5.58091	2.3927e-08	1.46803e-07
FBgn0051668	-	CG31668	CG31668	2L	1963	8.20176	1.28792	0.230935	5.57697	2.44747e-08	1.5003e-07
FBgn0036110	Cuticular protein 67Fb	Cpr67Fb	CG18348	3L	457	16.281	1.58768	0.284702	5.57662	2.45235e-08	1.50263e-07
FBgn0033980	Cytochrome P450 6a20	Cyp6a20	CG10245	2R	1801	7117.52	1.31999	0.236717	5.57622	2.45802e-08	1.50544e-07
FBgn0028410	Pk34A	Pk34A	CG5182	2L	1303	2.82825	1.81165	0.324953	5.57513	2.47351e-08	1.51359e-07
FBgn0033352	Poly(A)-binding protein-dependent poly(A) ribonuclease 2	PAN2	CG8232	2R	4051	3253.18	0.174831	0.0313871	5.57017	2.54486e-08	1.55588e-07
FBgn0025366	Intronic Protein 259	Ip259	CG5277	2L	1136	6932.61	0.397036	0.0712899	5.56932	2.55736e-08	1.56283e-07
FBgn0038068	-	CG11600	CG11600	3R	1330	1.39769	2.38161	0.427647	5.56909	2.56076e-08	1.56422e-07
FBgn0266420	Otefin	Ote	CG5581	2R	1571	100.618	0.570917	0.102561	5.5666	2.59752e-08	1.58598e-07
FBgn0039650	Metazoan SpoT homolog-1	Mesh1	CG11900	3R	642	195.902	0.637716	0.114612	5.56411	2.63487e-08	1.60737e-07
FBgn0037683	-	CG18473	CG18473	3R	1282	414.483	1.85038	0.332648	5.56257	2.65831e-08	1.61952e-07
FBgn0030805	wurst	wus	CG9089	X	2118	96.9888	0.668877	0.120244	5.56264	2.65717e-08	1.61952e-07
FBgn0051675	-	CG31675	CG31675	2L	1151	330.011	0.682318	0.122666	5.56243	2.6605e-08	1.62014e-07
FBgn0028563	sugar transporter 1	sut1	CG8714	2R	2412	763.612	0.563851	0.101421	5.55949	2.70571e-08	1.64623e-07
FBgn0043457	-	CG5180	CG5180	3R	1517	604.136	0.216885	0.0390582	5.55287	2.81012e-08	1.70751e-07
FBgn0032824	-	CG13962	CG13962	2L	769	21.6923	1.93532	0.348597	5.55174	2.8284e-08	1.71786e-07
FBgn0265362	-	CG44303	CG44303	X	398	61.464	1.1156	0.200971	5.55106	2.83935e-08	1.72376e-07
FBgn0038076	Cytochrome P450 313a4	Cyp313a4	CG6802	3R	1651	61.2844	1.15082	0.207345	5.55025	2.85269e-08	1.7311e-07
FBgn0034443	crammer	cer	CG10460	2R	497	1505.67	0.606347	0.109358	5.54461	2.94613e-08	1.78624e-07
FBgn0028675	Sulfonylurea receptor	Sur	CG5772	2L	7393	326.346	0.701065	0.126511	5.54152	2.99852e-08	1.81721e-07
FBgn0261530	nbs	nbs	CG6754	3L	2599	851.047	0.23352	0.0421603	5.53887	3.04426e-08	1.84332e-07
FBgn0039848	Lysyl oxidase-like 1	Loxl1	CG11335	3R	1435	61.0261	0.92377	0.166864	5.53608	3.09316e-08	1.87129e-07
FBgn0265140	Meltrin	Meltrin	CG7649	3R	5841	4038.57	0.392478	0.0709607	5.53092	3.18561e-08	1.92386e-07
FBgn0040060	yippee interacting protein 7	yip7	CG6457	3L	904	6.70058	1.92476	0.348051	5.53011	3.20031e-08	1.93106e-07
FBgn0037535	Phosphatidylinositol glycan anchor biosynthesis class H	PIG-H	CG14463	3R	1091	445.369	0.334084	0.0604536	5.52629	3.27071e-08	1.97096e-07
FBgn0052819	-	CG32819	CG32819	X	2191	115.825	0.952188	0.172535	5.51882	3.41291e-08	2.05397e-07
FBgn0038316	-	CG6276	CG6276	3R	1806	1523.51	0.165438	0.0299807	5.51814	3.42604e-08	2.06008e-07
FBgn0023516	Peroxin 5	Pex5	CG14815	X	2158	2716.22	0.353321	0.0640672	5.51485	3.49079e-08	2.09811e-07
FBgn0052029	Cuticular protein 66D	Cpr66D	CG32029	3L	1104	76.1658	1.32808	0.24118	5.50658	3.65877e-08	2.19621e-07
FBgn0033428	Uroporphyrinogen decarboxylase	Urod	CG1818	2R	1299	2347.07	0.350362	0.0636461	5.50484	3.695e-08	2.21604e-07
FBgn0261609	eukaryotic translation initiation factor 2 subunit alpha	eIF2alpha	CG9946	X	1519	2886.92	0.244806	0.0444835	5.5033	3.72742e-08	2.23452e-07
FBgn0020278	locomotion defects	loco	CG5248	3R	5330	2176.8	0.521456	0.0948046	5.50032	3.79092e-08	2.26964e-07
FBgn0051549	-	CG31549	CG31549	3R	1130	1375.42	0.497061	0.0903677	5.50043	3.78874e-08	2.26964e-07
FBgn0028360	Cdc7 kinase	Cdc7	CG32742	X	3103	1817.83	0.401313	0.0729616	5.50034	3.79065e-08	2.26964e-07
FBgn0039128	-	CG13599	CG13599	3R	1029	14.1922	0.946038	0.172016	5.49972	3.80397e-08	2.27647e-07
FBgn0035233	Peroxin 10	Pex10	CG7864	3L	1487	544.277	0.420816	0.0765666	5.49607	3.8834e-08	2.323e-07
FBgn0033266	Suppressor of Cytokine Signaling at 44A	Socs44A	CG2160	2R	1840	1399.52	0.251212	0.0457463	5.49141	3.98727e-08	2.38308e-07
FBgn0086706	pixie	pix	CG5651	3L	2223	10199.1	0.278882	0.0507889	5.49101	3.99649e-08	2.38756e-07
FBgn0031106	Syntaxin 16	Syx16	CG1467	X	1282	1299.01	0.306997	0.0559409	5.48788	4.06779e-08	2.42911e-07
FBgn0035425	-	CG17746	CG17746	3L	1694	1637.5	0.289116	0.0527183	5.48418	4.15398e-08	2.47637e-07
FBgn0085433	-	CG34404	CG34404	3R	2890	3625.34	0.308746	0.0563463	5.47945	4.26661e-08	2.54126e-07
FBgn0034049	bedraggled	bdg	CG8291	2R	4914	1643.74	0.348904	0.0637053	5.47684	4.32983e-08	2.5756e-07
FBgn0036504	yellow-k	yellow-k	CG7463	3L	1034	10.8424	1.17733	0.215002	5.47592	4.35246e-08	2.58795e-07
FBgn0042207	-	CG18530	CG18530	3R	1188	6.32233	1.41654	0.258812	5.47324	4.41871e-08	2.62509e-07
FBgn0039712	-	CG15514	CG15514	3R	1369	1248.7	0.115337	0.0210824	5.47075	4.48134e-08	2.65774e-07
FBgn0038873	-	CG5892	CG5892	3R	2329	84.7062	1.95427	0.357388	5.46822	4.54589e-08	2.69372e-07
FBgn0023174	Proteasome beta2 subunit	Prosbeta2	CG3329	3L	1034	3013.46	0.337601	0.0617482	5.46738	4.56728e-08	2.70524e-07
FBgn0033739	Dystrobrevin	Dyb	CG8529	2R	3370	7267.23	0.304326	0.0557321	5.46051	4.74762e-08	2.80965e-07
FBgn0029660	-	CG10801	CG10801	X	1758	2.31164	2.18662	0.400565	5.45884	4.79248e-08	2.83499e-07
FBgn0039009	-	CG13842	CG13842	3R	2504	28.5666	1.29334	0.236938	5.45856	4.80009e-08	2.83828e-07
FBgn0034175	ste24b prenyl protease type I	ste24b	CG9001	2R	1464	73.1803	0.644979	0.118187	5.45726	4.83532e-08	2.85789e-07
FBgn0042126	-	CG18788	CG18788	2L	1804	7.21059	1.50692	0.276204	5.45584	4.87432e-08	2.87945e-07
FBgn0002733	Enhancer of split mbeta, helix-loop-helix	E(spl)mbeta-HLH	CG14548	3R	978	400.54	0.74028	0.135687	5.45578	4.87596e-08	2.87945e-07
FBgn0032819	-	CG10463	CG10463	2L	1921	275.491	0.442422	0.0811226	5.45374	4.93205e-08	2.90946e-07
FBgn0031718	-	CG14014	CG14014	2L	1127	1.3266	2.45482	0.450778	5.44574	5.15893e-08	3.0375e-07
FBgn0038948	Jumonji domain containing 6	JMJD6	CG5383	3R	1590	1232.12	0.375209	0.068912	5.44476	5.18756e-08	3.05306e-07
FBgn0050095	-	CG30095	CG30095	2R	645	9.80348	1.2878	0.236698	5.44069	5.3074e-08	3.11883e-07
FBgn0050273	-	CG30273	CG30273	2R	1234	1377.84	0.956542	0.175903	5.43789	5.39154e-08	3.16638e-07
FBgn0040801	-	CG13053	CG13053	3L	620	4.98138	1.60058	0.295363	5.41904	5.99198e-08	3.49428e-07
FBgn0051704	-	CG31704	CG31704	2L	514	1063.07	1.24096	0.229006	5.41891	5.99647e-08	3.495e-07
FBgn0036142	aarF domain containing kinase 5	Adck5	CG7616	3L	2320	470.349	0.615289	0.113655	5.41365	6.17522e-08	3.59464e-07
FBgn0064126	-	CG33722	CG33722	3R	3544	508.398	0.321471	0.0593873	5.41313	6.19323e-08	3.60361e-07
FBgn0040759	-	CG13177	CG13177	2R	1099	22.0242	1.51387	0.279717	5.41216	6.22675e-08	3.6216e-07
FBgn0036282	SET and MYND domain containing, class 4, member 2	Smyd4-2	CG14122	3L	2165	71.8849	0.643275	0.118913	5.40962	6.31586e-08	3.67189e-07
FBgn0035243	-	CG13926	CG13926	3L	726	254.682	0.606524	0.112196	5.40594	6.44677e-08	3.74485e-07
FBgn0027579	minotaur	mino	CG5508	3R	3546	10193.3	0.473115	0.0875206	5.40575	6.45362e-08	3.74726e-07
FBgn0035343	-	CG16762	CG16762	3L	885	9.94284	1.38895	0.256999	5.40448	6.49957e-08	3.77236e-07
FBgn0029945	Acyl-CoA synthetase family member 3	Acsf3	CG18155	X	2047	27.7353	0.734368	0.135949	5.40177	6.59868e-08	3.82508e-07
FBgn0264694	merry-go-round	mgr	CG6719	3R	946	1217.33	0.214345	0.0396957	5.39971	6.67472e-08	3.86754e-07
FBgn0029892	-	CG3184	CG3184	X	1179	401.583	0.318919	0.0590826	5.39785	6.74457e-08	3.90638e-07
FBgn0053985	-	CG33985	CG33985	3L	860	2.55797	2.17901	0.404134	5.39179	6.97575e-08	4.03354e-07
FBgn0002524	lace	lace	CG4162	2L	2991	2334.66	0.350432	0.0651409	5.3796	7.46534e-08	4.30765e-07
FBgn0031249	-	CG11911	CG11911	2L	970	5.10435	1.99362	0.371259	5.36989	7.87853e-08	4.54039e-07
FBgn0036302	sosondowah	sowah	CG10632	3L	2749	2034.71	0.180947	0.0337007	5.36923	7.90752e-08	4.55521e-07
FBgn0286788	Origin recognition complex subunit 1	Orc1	CG10667	2R	3152	65.3237	0.771154	0.143715	5.36584	8.05727e-08	4.63761e-07
FBgn0036969	Serpin 77Bb	Spn77Bb	CG6663	3L	1161	5.06148	1.53072	0.28529	5.36549	8.07282e-08	4.64464e-07
FBgn0033327	Peptidoglycan recognition protein SC1b	PGRP-SC1b	CG8577	2R	1649	1.39893	2.47966	0.462305	5.36369	8.15385e-08	4.68736e-07
FBgn0032693	Cytochrome P450 310a1	Cyp310a1	CG10391	2L	1658	6.65251	1.72716	0.322179	5.36085	8.28305e-08	4.75375e-07
FBgn0036008	-	CG3408	CG3408	3L	1888	282.296	0.414579	0.0773975	5.35649	8.48558e-08	4.86394e-07
FBgn0039855	-	CG1638	CG1638	3R	1567	57.5664	0.949999	0.177453	5.35352	8.62595e-08	4.93828e-07
FBgn0014464	Chorion protein a at 7F	Cp7Fa	CG33962	X	1183	128.715	0.932634	0.174282	5.35129	8.73275e-08	4.99735e-07
FBgn0031036	-	CG14220	CG14220	X	1817	843.379	0.295357	0.0552002	5.35066	8.7632e-08	5.01271e-07
FBgn0034249	Rho GTPase activating protein at 54D	RhoGAP54D	CG6477	2R	3791	131.794	0.701697	0.131178	5.34921	8.83381e-08	5.05102e-07
FBgn0034627	eukaryotic translation elongation factor, selenocysteine-specific	eEFSec	CG9841	2R	1613	188.184	0.451575	0.0844227	5.34898	8.84506e-08	5.05536e-07
FBgn0031811	-	CG13982	CG13982	2L	2643	467.488	0.323121	0.0604319	5.34687	8.94878e-08	5.11253e-07
FBgn0033981			CG10247	2R	1631	1504.75	0.913833	0.170944	5.34581	9.00127e-08	5.1404e-07
FBgn0024973	-	CG2701	CG2701	X	2425	1878.69	0.234499	0.0438881	5.3431	9.13693e-08	5.21573e-07
FBgn0266282	java no jive	jnj	CG5524	3R	3590	960.444	0.243628	0.0456019	5.34249	9.1677e-08	5.23113e-07
FBgn0036373	Tondu-domain-containing Growth Inhibitor	Tgi	CG10741	3L	2045	1333.89	0.396276	0.074192	5.34123	9.23178e-08	5.26553e-07
FBgn0037279	-	CG1129	CG1129	3R	2499	1266.72	0.419078	0.0784635	5.34106	9.24063e-08	5.26841e-07
FBgn0038009	-	CG17738	CG17738	3R	411	8.09803	1.28314	0.240379	5.33798	9.39898e-08	5.35209e-07
FBgn0033296	Maltase A7	Mal-A7	CG11669	2R	2717	2.26511	2.31158	0.433314	5.33465	9.57276e-08	5.44881e-07
FBgn0028689	Regulatory particle non-ATPase 6	Rpn6	CG10149	2R	1827	4620.02	0.368127	0.069089	5.3283	9.91375e-08	5.62679e-07
FBgn0020249	steamer duck	stck	CG7954	3R	1500	3573.49	0.348496	0.0654036	5.32839	9.90852e-08	5.62679e-07
FBgn0038257	Senescence marker protein-30	smp-30	CG7390	3R	1297	8284.51	1.10118	0.206732	5.32658	1.00078e-07	5.67777e-07
FBgn0266268	Ferrochelatase	FeCH	CG2098	3R	1466	1909.27	0.273538	0.0513744	5.3244	1.01287e-07	5.74403e-07
FBgn0026313	X11L	X11L	CG5675	X	5288	4369.32	0.162676	0.03056	5.32316	1.01978e-07	5.78082e-07
FBgn0003733	torso	tor	CG1389	2R	3131	19.2858	1.00119	0.188106	5.32249	1.02359e-07	5.80007e-07
FBgn0000568	Ecdysone-induced protein 75B	Eip75B	CG8127	3L	8236	9580.05	0.266417	0.050067	5.32122	1.03076e-07	5.83833e-07
FBgn0024361	Tetraspanin 2A	Tsp2A	CG11415	X	1002	68.3454	0.776942	0.146063	5.31923	1.04206e-07	5.89751e-07
FBgn0264324	sponge	spg	CG31048	3R	8052	4398.17	0.287529	0.0540726	5.31747	1.05222e-07	5.95254e-07
FBgn0260857	Blocked early in transport 1	Bet1	CG14084	3L	987	833.703	0.428523	0.0805968	5.31688	1.05564e-07	5.96945e-07
FBgn0035262	-	CG18171	CG18171	3L	2538	242.009	0.502595	0.0945675	5.31467	1.06853e-07	6.03988e-07
FBgn0032147	Inositol 1,4,5-triphosphate kinase 1	IP3K1	CG4026	2L	2055	4837.51	0.500749	0.0942244	5.31443	1.06991e-07	6.04525e-07
FBgn0261461	Rho GTPase activating protein at 18B	RhoGAP18B	CG42274	X	4695	5403.06	0.320849	0.0604227	5.31008	1.09578e-07	6.18636e-07
FBgn0020429	Glutamate receptor IIB	GluRIIB	CG7234	2L	2949	7.94375	1.3612	0.256371	5.30948	1.09939e-07	6.20423e-07
FBgn0039869	-	CG1890	CG1890	3R	704	724.057	0.489274	0.0922714	5.30255	1.14199e-07	6.43223e-07
FBgn0035995	-	CG3529	CG3529	3L	2120	3149.72	0.221098	0.0416968	5.30253	1.14212e-07	6.43223e-07
FBgn0039348	Nuclear protein localization 4	Npl4	CG4673	3R	2362	5346.03	0.514423	0.0970453	5.30085	1.15263e-07	6.4888e-07
FBgn0286833	-	CG46387	CG46387	3L	762	18.0474	1.01897	0.192419	5.29556	1.18651e-07	6.6687e-07
FBgn0039156	-	CG6178	CG6178	3R	2008	1803.81	0.453448	0.0856818	5.29223	1.20832e-07	6.78577e-07
FBgn0034224	insensible	insb	CG6520	2R	1059	4.19393	2.02084	0.38235	5.2853	1.25498e-07	7.04212e-07
FBgn0015926	discontinuous actin hexagon	dah	CG6157	X	2353	33.4275	0.599097	0.11341	5.28259	1.27368e-07	7.13837e-07
FBgn0032943	Tetraspanin 39D	Tsp39D	CG8666	2L	2359	3535.89	0.305544	0.0578668	5.28013	1.29095e-07	7.22641e-07
FBgn0042180	-	CG18870	CG18870	2R	2937	861.961	0.158443	0.0300107	5.27954	1.29507e-07	7.24654e-07
FBgn0263755	Suppressor of variegation 3-9	Su(var)3-9	CG43664	3R	2386	216.793	0.321676	0.0609589	5.27693	1.31367e-07	7.34763e-07
FBgn0050115	Guanine nucleotide exchange factor in mesoderm	GEFmeso	CG30115	2R	6170	2393.78	0.291645	0.0552797	5.27579	1.32183e-07	7.39032e-07
FBgn0035782	-	CG14835	CG14835	3L	659	1.5227	2.30804	0.43754	5.27503	1.32732e-07	7.418e-07
FBgn0035674	-	CG13295	CG13295	3L	1638	993.858	0.194694	0.0369143	5.27421	1.33333e-07	7.44558e-07
FBgn0022023	eukaryotic translation initiation factor 3 subunit h	eIF3h	CG9124	2L	1496	6110.84	0.249394	0.0474169	5.25959	1.44378e-07	8.04294e-07
FBgn0037517	-	CG10086	CG10086	3R	1864	2.72359	1.94103	0.369202	5.25737	1.4613e-07	8.13726e-07
FBgn0032036	-	CG13384	CG13384	2L	2693	3600.83	0.210849	0.0401197	5.2555	1.47626e-07	8.21394e-07
FBgn0040259	UDP-glycosyltransferase family 302 member C1	Ugt302C1	CG18578	3R	1994	3336.67	0.470087	0.0894797	5.25356	1.49188e-07	8.2846e-07
FBgn0033538	-	CG11883	CG11883	2R	3895	3019.9	0.235481	0.0448513	5.25026	1.51888e-07	8.43077e-07
FBgn0004635	rhomboid	rho	CG1004	3L	3000	1963.16	0.55798	0.106283	5.24993	1.52158e-07	8.44239e-07
FBgn0052702	Cubilin	Cubn	CG32702	X	11349	1074.8	0.501656	0.0956626	5.24401	1.57121e-07	8.70733e-07
FBgn0037070	-	CG11309	CG11309	3L	2125	3374.42	0.413785	0.0789545	5.2408	1.59886e-07	8.85697e-07
FBgn0250836	Acyl-CoA binding protein 3	Acbp3	CG8628	3L	429	5.4838	1.90012	0.362639	5.2397	1.6084e-07	8.90628e-07
FBgn0043903	domeless	dome	CG14226	X	4875	2466.1	0.230895	0.0440739	5.23882	1.61608e-07	8.94524e-07
FBgn0051118	RabX4	RabX4	CG31118	3R	1416	1970.57	0.171841	0.0328087	5.23767	1.62616e-07	8.99385e-07
FBgn0037359	Mediator complex subunit 27	MED27	CG1245	3R	1080	181.459	0.26703	0.0510232	5.23351	1.66321e-07	9.1841e-07
FBgn0031169	-	CG1494	CG1494	X	5469	34.485	0.623431	0.119199	5.23018	1.69343e-07	9.34351e-07
FBgn0013323	Prothoracicotropic hormone	Ptth	CG13687	2L	1019	112.121	0.740301	0.141613	5.22764	1.71686e-07	9.46528e-07
FBgn0261363	Prophenoloxidase 3	PPO3	CG42640	2R	2228	112.676	0.963882	0.184567	5.22239	1.76625e-07	9.7337e-07
FBgn0021814	Vacuolar protein sorting 28	Vps28	CG12770	2R	1173	1657.48	0.278636	0.0533796	5.2199	1.79018e-07	9.85772e-07
FBgn0038658	-	CG14292	CG14292	3R	648	4.55131	1.90285	0.364778	5.21645	1.82384e-07	1.00391e-06
FBgn0264270	Sex lethal	Sxl	CG43770	X	5964	11712.9	0.26458	0.0507408	5.21434	1.8447e-07	1.01459e-06
FBgn0035168	Centrosomal protein 290kDa	Cep290	CG13889	3L	6441	78.2868	0.866036	0.166298	5.20772	1.91174e-07	1.05104e-06
FBgn0032216	Ubiquitin specific protease 14	Usp14	CG5384	2L	1632	2259.22	0.269919	0.0518686	5.20391	1.95137e-07	1.0724e-06
FBgn0032144	-	CG17633	CG17633	2L	1350	1.51132	2.35941	0.453436	5.2034	1.95671e-07	1.07448e-06
FBgn0003373	Salivary gland secretion 3	Sgs3	CG11720	3L	1109	1.81499	2.34786	0.451505	5.20008	1.99202e-07	1.09344e-06
FBgn0032934	-	CG8679	CG8679	2L	2541	474.051	0.561063	0.108001	5.19497	2.04748e-07	1.12255e-06
FBgn0016078	wunen	wun	CG8804	2R	2026	2627.59	0.473414	0.0912184	5.1899	2.10407e-07	1.15221e-06
FBgn0010379	Akt kinase	Akt	CG4006	3R	4869	4030.22	0.206075	0.0397063	5.18997	2.10329e-07	1.15221e-06
FBgn0028411	NTF2-related export protein 1	Nxt1	CG12752	2R	540	367.193	0.302117	0.0583281	5.1796	2.22359e-07	1.21478e-06
FBgn0259192	-	CG42296	CG42296	2L	3206	4.37661	1.86168	0.359497	5.17858	2.23586e-07	1.22052e-06
FBgn0004577	Peroxidase	Pxd	CG3477	3R	2558	6.77822	1.62576	0.314017	5.1773	2.25121e-07	1.22842e-06
FBgn0250904	-	CG34434	CG34434	X	1691	4.50193	1.7424	0.336554	5.17717	2.25272e-07	1.22876e-06
FBgn0033191	-	CG1598	CG1598	2R	1259	2321.23	0.218588	0.042232	5.17588	2.2684e-07	1.23634e-06
FBgn0264443	-	CG43861	CG43861	2L	3486	861.025	0.217614	0.0420446	5.1758	2.26932e-07	1.23635e-06
FBgn0032057	-	CG9287	CG9287	2L	1979	1.65271	2.17738	0.420807	5.17431	2.28754e-07	1.24579e-06
FBgn0035922	Peroxin 7	Pex7	CG6486	3L	1443	132.012	0.864444	0.167202	5.17005	2.34028e-07	1.27301e-06
FBgn0035998	-	CG3437	CG3437	3L	1126	328.907	0.232373	0.0450023	5.16357	2.42278e-07	1.31685e-06
FBgn0052436	-	CG32436	CG32436	3L	5407	50.822	0.855651	0.165714	5.16342	2.42484e-07	1.31746e-06
FBgn0017448	-	CG2187	CG2187	3R	2580	1.66839	2.17074	0.420508	5.16218	2.44089e-07	1.32513e-06
FBgn0286516	aaquetzalli	aqz	CG9821	3R	6145	13665.2	0.277077	0.0536886	5.16081	2.45881e-07	1.33382e-06
FBgn0033065	Cytochrome P450 6w1	Cyp6w1	CG8345	2R	2392	48538.5	1.30066	0.252111	5.15908	2.48162e-07	1.34462e-06
FBgn0025469	saliva	slv	CG8717	2R	1381	537.784	0.203092	0.039386	5.15645	2.51679e-07	1.36154e-06
FBgn0036815	HP1-HOAP-interacting protein	HipHop	CG6874	3L	1183	198.343	0.409317	0.0793976	5.15528	2.5325e-07	1.36951e-06
FBgn0264393	-	CG43841	CG43841	X	357	30.0931	1.33766	0.260061	5.14363	2.69476e-07	1.45498e-06
FBgn0039529	-	CG5612	CG5612	3R	1507	1908.16	0.388492	0.0755667	5.14105	2.73213e-07	1.47401e-06
FBgn0266437	-	CG45067	CG45067	3L	2736	10.2034	1.61007	0.313235	5.14012	2.74564e-07	1.48072e-06
FBgn0283712	LIM domain kinase 1	LIMK1	CG1848	X	5627	3148.76	0.227076	0.0441927	5.13832	2.77207e-07	1.49407e-06
FBgn0031344	-	CG7420	CG7420	2L	1573	534.927	0.504158	0.0981772	5.13518	2.81874e-07	1.5172e-06
FBgn0050269	-	CG30269	CG30269	2R	1234	111.777	1.02138	0.198975	5.13322	2.84834e-07	1.53253e-06
FBgn0069354	Porin2	Porin2	CG17137	2L	1128	17.0586	1.70705	0.332709	5.13076	2.88567e-07	1.55141e-06
FBgn0037648	-	CG11975	CG11975	3R	1733	1748.89	0.138772	0.0271196	5.11705	3.10356e-07	1.66468e-06
FBgn0030640	-	CG6294	CG6294	X	2551	369.597	0.274813	0.0537064	5.11695	3.10515e-07	1.66489e-06
FBgn0003483	spindle E	spn-E	CG3158	3R	4678	174.72	0.680702	0.13306	5.11576	3.12473e-07	1.67474e-06
FBgn0030314	-	CG11696	CG11696	X	2235	700.204	0.184443	0.0360666	5.11395	3.1549e-07	1.69025e-06
FBgn0034143	-	CG8303	CG8303	2R	2200	497.733	0.711005	0.139055	5.11312	3.16884e-07	1.69707e-06
FBgn0015828	Transcription factor IIEalpha	TfIIEalpha	CG10415	3L	1622	1031.28	0.255447	0.0499608	5.11296	3.17153e-07	1.69785e-06
FBgn0030823	Tubulin tyrosine ligase-like 1A	TTLL1A	CG8918	X	1630	1.67445	2.2559	0.441344	5.11144	3.19718e-07	1.71092e-06
FBgn0037603	Sys1 golgi trafficking protein	Sys1	CG11753	3R	801	883.472	0.263721	0.0516302	5.10788	3.25796e-07	1.74076e-06
FBgn0030519	-	CG11151	CG11151	X	1066	5011.2	0.394524	0.0772781	5.10525	3.30361e-07	1.76379e-06
FBgn0038854	-	CG7044	CG7044	3R	3171	1224.01	0.341127	0.0668413	5.10354	3.33367e-07	1.77915e-06
FBgn0034472	-	CG8517	CG8517	2R	732	3.13285	2.3384	0.458307	5.10225	3.35642e-07	1.79061e-06
FBgn0035211	-	CG2211	CG2211	3L	1941	582.287	0.37683	0.0738782	5.10069	3.38423e-07	1.80406e-06
FBgn0052843	Diuretic hormone 31 Receptor	Dh31-R	CG32843	2R	3284	1454.97	0.336132	0.0659498	5.09679	3.45467e-07	1.83878e-06
FBgn0015799	Retinoblastoma-family protein	Rbf	CG7413	X	3619	2072.07	0.167733	0.0329506	5.09043	3.57245e-07	1.89828e-06
FBgn0036846	Misexpression suppressor of ras 6	MESR6	CG6818	3L	1791	570.468	0.30807	0.0605278	5.08972	3.58584e-07	1.9042e-06
FBgn0043576	Peptidoglycan recognition protein SC1a	PGRP-SC1a	CG14746	2R	588	1.72298	2.09088	0.410835	5.08933	3.59328e-07	1.90743e-06
FBgn0262570	-	CG43110	CG43110	2R	8272	416.334	0.819767	0.161172	5.0863	3.65112e-07	1.93664e-06
FBgn0038569	-	CG7218	CG7218	3R	2543	1641.35	0.265625	0.052234	5.0853	3.67053e-07	1.9462e-06
FBgn0036923	-	CG17732	CG17732	3L	2373	5.3036	1.51576	0.298134	5.08417	3.69243e-07	1.95631e-06
FBgn0004841	Tachykinin-like receptor at 86C	TkR86C	CG6515	3R	3223	344.867	0.487138	0.0958742	5.08102	3.75418e-07	1.98751e-06
FBgn0034971	Glycerol-3-phosphate acyltransferase 4	Gpat4	CG3209	2R	1985	3856.4	0.356082	0.070144	5.07644	3.8457e-07	2.03441e-06
FBgn0026380	Proteasome beta3 subunit	Prosbeta3	CG11981	3R	914	1840.68	0.298315	0.0587718	5.07582	3.85834e-07	2.04031e-06
FBgn0035849	estrogen-related receptor	ERR	CG7404	3L	2119	1373.24	0.207488	0.0409528	5.06651	4.05185e-07	2.13693e-06
FBgn0085307	-	CG34278	CG34278	3R	344	3.48878	1.9752	0.38991	5.06579	4.06716e-07	2.14338e-06
FBgn0033520	Peroxiredoxin 2540-1	Prx2540-1	CG12405	2R	848	2157.93	0.919287	0.18159	5.06243	4.13941e-07	2.18063e-06
FBgn0036194	Diphthamide biosynthesis 1	Dph1	CG11652	3L	1784	1287.07	0.516781	0.102116	5.06072	4.17687e-07	2.19952e-06
FBgn0034904	-	CG15800	CG15800	2R	614	7.04437	1.28769	0.254532	5.05903	4.21392e-07	2.21819e-06
FBgn0034118	Nucleoporin 62kD	Nup62	CG6251	2R	1452	809.054	0.247874	0.0490462	5.05389	4.32893e-07	2.277e-06
FBgn0034583	-	CG10527	CG10527	2R	1160	10187.2	0.418575	0.0829546	5.04583	4.51567e-07	2.37163e-06
FBgn0031115	-	CG11710	CG11710	X	1903	1070.79	0.287206	0.0569993	5.03876	4.68561e-07	2.45901e-06
FBgn0037315	Ceramide kinase	Cerk	CG16708	3R	2786	4283.31	0.186574	0.0370604	5.03432	4.7955e-07	2.51383e-06
FBgn0036237	viral IAP-associated factor	viaf	CG18593	3L	1158	1464.88	0.34802	0.0692176	5.02791	4.9585e-07	2.59731e-06
FBgn0034057	-	CG8314	CG8314	2R	1280	1290.8	0.327989	0.065278	5.0245	5.04745e-07	2.6419e-06
FBgn0029860	-	CG15891	CG15891	X	829	958.373	0.29992	0.0597017	5.02365	5.06992e-07	2.65266e-06
FBgn0040212	Glyceronephosphate O-acyltransferase	Gnpat	CG4625	3R	3516	1888.54	0.294352	0.0585942	5.02357	5.07209e-07	2.6528e-06
FBgn0034792	YME1 like ATPase	YME1L	CG3499	2R	2940	2652.4	0.114151	0.0227317	5.02167	5.1224e-07	2.67608e-06
FBgn0021760	chromosome bows	chb	CG32435	3L	5930	4376.16	0.296016	0.0589658	5.02013	5.16378e-07	2.69567e-06
FBgn0034489	pickpocket 6	ppk6	CG11209	2R	1625	3.24169	2.01673	0.402237	5.01378	5.33709e-07	2.78299e-06
FBgn0035711	-	CG8519	CG8519	3L	1303	156.44	0.61493	0.122665	5.01309	5.35628e-07	2.79195e-06
FBgn0037999	-	CG4860	CG4860	3R	1393	369.031	0.558601	0.111574	5.00657	5.54098e-07	2.88498e-06
FBgn0035490	-	CG1136	CG1136	3L	2704	1204.8	0.581412	0.116163	5.00514	5.5821e-07	2.90529e-06
FBgn0030858	Integrator 2	IntS2	CG8211	X	3668	1077.27	0.205996	0.041188	5.00137	5.69253e-07	2.96054e-06
FBgn0037751	matotopetli	topi	CG8484	3R	2652	48.0623	1.33737	0.267455	5.00034	5.72283e-07	2.97295e-06
FBgn0003396	schnurri	shn	CG7734	2R	9886	3543.75	0.316193	0.063234	5.00036	5.72225e-07	2.97295e-06
FBgn0027335	Rab11 interacting protein	Rip11	CG6606	X	3808	4899.95	0.221531	0.044308	4.99979	5.73938e-07	2.98043e-06
FBgn0038248	-	CG7886	CG7886	3R	3436	15.0717	0.873576	0.174782	4.99809	5.79002e-07	3.00487e-06
FBgn0052672	Autophagy-related 8a	Atg8a	CG32672	X	1214	25206.2	0.236527	0.047336	4.99676	5.83008e-07	3.02414e-06
FBgn0005390	female sterile (1) M3	fs(1)M3	CG4790	X	5690	28.3756	0.897398	0.179794	4.99126	5.99868e-07	3.11043e-06
FBgn0024986	-	CG3719	CG3719	X	831	2073.56	0.26998	0.0541011	4.99029	6.02901e-07	3.12382e-06
FBgn0023197	Jonah 74E	Jon74E	CG6298	3L	903	19.3811	1.5384	0.308471	4.98717	6.12694e-07	3.171e-06
FBgn0010358	deltaTrypsin	deltaTry	CG12351	2R	810	1.67855	2.26453	0.454217	4.98557	6.17784e-07	3.19615e-06
FBgn0034936	Stomatin like 2	Stoml2	CG2970	2R	1354	1871.7	0.307814	0.0617775	4.98262	6.27294e-07	3.24051e-06
FBgn0034197	Chitin deacetylase-like 9	Cda9	CG15918	2R	1637	68.7603	0.723995	0.145422	4.97858	6.40539e-07	3.30401e-06
FBgn0262880	-	CG43235	CG43235	2L	678	16.7445	1.44888	0.291063	4.97791	6.42762e-07	3.31424e-06
FBgn0035241	-	CG12105	CG12105	3L	5106	189.338	0.610622	0.122837	4.97099	6.66135e-07	3.42711e-06
FBgn0030120	-	CG17440	CG17440	X	1300	9.4375	1.35683	0.273018	4.96974	6.70411e-07	3.44655e-06
FBgn0024985	Rab interacting lysosomal protein like	Rilpl	CG11448	X	3799	9126.95	0.188185	0.0378675	4.96958	6.70986e-07	3.44822e-06
FBgn0033241	-	CG2915	CG2915	2R	1750	1350.47	0.357247	0.071929	4.96666	6.81165e-07	3.49924e-06
FBgn0030039	-	CG12123	CG12123	X	1044	562.466	0.265078	0.0533749	4.96634	6.82292e-07	3.50373e-06
FBgn0045842	yuri gagarin	yuri	CG31732	2L	2920	1244.75	0.730469	0.147114	4.96532	6.85891e-07	3.52091e-06
FBgn0044809	Turandot Z	TotZ	CG31507	3R	573	3.70774	2.17021	0.43747	4.96083	7.01935e-07	3.59532e-06
FBgn0015245	Heat shock protein 60A	Hsp60A	CG12101	X	2357	17476.4	0.239459	0.0483031	4.95743	7.14317e-07	3.65464e-06
FBgn0035719	target of wingless	tow	CG14821	3L	2654	2748.69	0.22694	0.0458082	4.95414	7.26492e-07	3.71149e-06
FBgn0086356	tumbleweed	tum	CG13345	2R	2353	25.673	0.935525	0.188936	4.95154	7.36277e-07	3.75868e-06
FBgn0030521	Cathepsin B	CtsB	CG10992	X	1594	15550.3	0.438941	0.0886468	4.95157	7.36175e-07	3.75868e-06
FBgn0086265	palisade	psd	CG9050	2L	1543	4.11114	1.84016	0.371771	4.94972	7.43187e-07	3.79255e-06
FBgn0033887	Sulfotransferase 4	St4	CG6704	2R	1183	21.8293	1.27734	0.258517	4.94103	7.77096e-07	3.95831e-06
FBgn0030594	fezzik	fiz	CG9509	X	2980	1599.76	2.07465	0.420005	4.93958	7.82901e-07	3.98641e-06
FBgn0011230	purity of essence	poe	CG14472	2L	16216	16667.7	0.236679	0.0479177	4.93928	7.84115e-07	3.99113e-06
FBgn0039299	-	CG11854	CG11854	3R	1039	281.315	1.73965	0.35229	4.93811	7.88845e-07	4.01225e-06
FBgn0262517	Listerin E3 ubiquitin protein ligase 1	Ltn1	CG32210	3L	5404	3492.64	0.210739	0.0427063	4.93461	8.03115e-07	4.08184e-06
FBgn0263782	HMG Coenzyme A reductase	Hmgcr	CG10367	3R	3818	1600.79	0.238757	0.0484205	4.93091	8.18491e-07	4.15389e-06
FBgn0287210	-	CG46440	CG46440	X	2903	1447.08	0.181059	0.0367216	4.93059	8.19828e-07	4.15763e-06
FBgn0039564	Neprilysin 7	Nep7	CG5527	3R	2346	553.593	0.60152	0.122037	4.92899	8.26551e-07	4.18867e-06
FBgn0039851	morpheyus	mey	CG12063	3R	3385	4.68384	1.49135	0.30274	4.92618	8.38542e-07	4.24632e-06
FBgn0034361	mitochondrial ribosomal protein S28	mRpS28	CG5497	2R	691	814.868	0.273833	0.0556103	4.92413	8.47353e-07	4.28938e-06
FBgn0034180	Eps15 homology domain containing protein-binding protein 1	Ehbp1	CG15609	2R	4361	6790.49	0.178476	0.0362705	4.92069	8.62407e-07	4.36399e-06
FBgn0037149	-	CG14561	CG14561	3L	1310	103.53	0.508961	0.10346	4.91942	8.67995e-07	4.38906e-06
FBgn0035948	-	CG5644	CG5644	3L	1712	1508.33	0.627263	0.127593	4.91614	8.82652e-07	4.45667e-06
FBgn0038244	-	CG7987	CG7987	3R	4416	3745.55	0.169744	0.0345333	4.91537	8.8617e-07	4.4728e-06
FBgn0053986	-	CG33986	CG33986	3L	871	1.61216	2.26065	0.460506	4.90906	9.1516e-07	4.60236e-06
FBgn0039140	Mitochondrial Rho	Miro	CG5410	3R	3791	3137.05	0.169516	0.0345487	4.90658	9.26771e-07	4.65738e-06
FBgn0031710	Vacuolar protein sorting 52	Vps52	CG7371	2L	2168	1268.67	0.219812	0.0448145	4.90493	9.34623e-07	4.69514e-06
FBgn0037974	-	CG12224	CG12224	3R	1147	2147.13	2.04231	0.416503	4.90346	9.41617e-07	4.72856e-06
FBgn0054010	Glycine N-acyltransferase	Glyat	CG34010	2L	876	66.5056	1.15021	0.234612	4.90259	9.45815e-07	4.74791e-06
FBgn0005695	germ cell-less	gcl	CG8411	2R	2506	1272.72	0.264787	0.054031	4.90065	9.55195e-07	4.79153e-06
FBgn0033134	Tetraspanin 42El	Tsp42El	CG12840	2R	1062	1863.62	0.395134	0.0806354	4.90025	9.57156e-07	4.79963e-06
FBgn0033261	under-developed	udd	CG18316	2R	1024	496.724	0.334696	0.0683624	4.89591	9.78505e-07	4.90314e-06
FBgn0030582	-	CG14411	CG14411	X	3433	2624.29	0.124668	0.0254908	4.89073	1.00465e-06	5.0287e-06
FBgn0033787	-	CG13321	CG13321	2R	2043	3.68561	2.09215	0.427909	4.88926	1.01217e-06	5.06453e-06
FBgn0032291	-	CG17118	CG17118	2L	979	9.00575	1.56821	0.32078	4.88875	1.01478e-06	5.07392e-06
FBgn0029629	eukaryotic translation initiation factor 3 subunit g1	eIF3g1	CG8636	X	1027	4286.15	0.390062	0.0798073	4.88755	1.02099e-06	5.09578e-06
FBgn0035855	-	CG7366	CG7366	3L	1340	70.8317	0.536817	0.109872	4.88582	1.02997e-06	5.13872e-06
FBgn0039341	-	CG5112	CG5112	3R	1803	1546.02	0.421448	0.0863249	4.88211	1.04957e-06	5.22901e-06
FBgn0085325	-	CG34296	CG34296	3R	420	3.51806	1.74857	0.35822	4.88128	1.054e-06	5.24915e-06
FBgn0002787	Regulatory particle non-ATPase 8	Rpn8	CG3416	2R	1473	2502.12	0.22186	0.0455507	4.87061	1.11256e-06	5.52694e-06
FBgn0010352	Oxoglutarate dehydrogenase	Ogdh	CG11661	3L	4384	38497.3	0.197909	0.0406404	4.86977	1.1173e-06	5.54849e-06
FBgn0033781	-	CG13319	CG13319	2R	691	425.051	0.452341	0.0929456	4.86672	1.13463e-06	5.62245e-06
FBgn0087007	big bang	bbg	CG42230	3L	8707	2721.08	0.420993	0.0865169	4.86601	1.13871e-06	5.64064e-06
FBgn0030509	-	CG11162	CG11162	X	919	4.24906	2.0757	0.426814	4.86324	1.15478e-06	5.71821e-06
FBgn0039003	wolfram syndrome 1	wfs1	CG4917	3R	2671	921.524	0.260043	0.0534966	4.86092	1.16841e-06	5.78155e-06
FBgn0085374	-	CG34345	CG34345	2L	1777	3.49162	1.93072	0.397305	4.85953	1.17665e-06	5.82026e-06
FBgn0039135	-	CG13603	CG13603	3R	1046	2807.13	0.242405	0.0498949	4.8583	1.18396e-06	5.85224e-06
FBgn0026252	moleskin	msk	CG7935	3L	3979	4602.69	0.205287	0.0422568	4.85809	1.18522e-06	5.8564e-06
FBgn0003062	Fibrillarin	Fib	CG9888	2R	1318	684.487	0.433591	0.0893724	4.8515	1.22528e-06	6.05003e-06
FBgn0025712	-	CG13920	CG13920	3L	1292	2336.09	0.228157	0.047041	4.85018	1.23352e-06	6.08854e-06
FBgn0264979	-	CG4267	CG4267	2L	2182	1374.32	0.88982	0.18348	4.8497	1.23651e-06	6.10111e-06
FBgn0033122	-	CG17002	CG17002	2R	1722	888.506	0.224457	0.0462855	4.8494	1.23835e-06	6.10801e-06
FBgn0031837	Dpr-interacting protein iota	DIP-iota	CG11320	2L	1327	47.5388	1.1168	0.230332	4.84867	1.24289e-06	6.12823e-06
FBgn0030834	-	CG8675	CG8675	X	1071	618.684	0.214861	0.044365	4.84302	1.27882e-06	6.29642e-06
FBgn0050471	-	CG30471	CG30471	2R	2435	3.13438	1.60493	0.331548	4.84073	1.29365e-06	6.36492e-06
FBgn0261445	sugarless	sgl	CG10072	3L	2275	2332.46	0.561486	0.115995	4.84059	1.29452e-06	6.36693e-06
FBgn0085425	-	CG34396	CG34396	2R	3484	629.843	0.535786	0.110706	4.83972	1.30019e-06	6.39031e-06
FBgn0038349	Aldehyde oxidase 3	AOX3	CG6045	3R	4562	9280.43	0.668607	0.138178	4.83875	1.30658e-06	6.41487e-06
FBgn0036363	-	CG10140	CG10140	3L	969	3.92523	1.75489	0.362724	4.83808	1.311e-06	6.43428e-06
FBgn0033349	-	CG8243	CG8243	2R	2410	1617.32	0.176529	0.0364923	4.83744	1.31523e-06	6.45278e-06
FBgn0039856	-	CG1774	CG1774	3R	1860	1619.23	0.5326	0.110104	4.83724	1.31656e-06	6.45702e-06
FBgn0025692	Lifeguard	Lfg	CG3814	2R	1073	411.105	0.87853	0.181929	4.82897	1.37244e-06	6.71919e-06
FBgn0050466	-	CG30466	CG30466	2R	2017	426.393	0.401653	0.0832236	4.82619	1.3917e-06	6.81105e-06
FBgn0029944	Downstream of kinase	Dok	CG2079	X	3487	542.328	0.211099	0.0437417	4.82603	1.39278e-06	6.81397e-06
FBgn0267384	Ubiquitin conjugating enzyme 7	Ubc7	CG4443	X	1886	3258.38	0.196088	0.0406405	4.82495	1.40039e-06	6.84877e-06
FBgn0036266	tRNA splicing endonuclease subunit 54	Tsen54	CG5626	3L	1491	118.787	0.300678	0.0623196	4.82477	1.40163e-06	6.85242e-06
FBgn0010488	NAT1	NAT1	CG3845	2R	5618	20190	0.220057	0.0456119	4.82456	1.40312e-06	6.85728e-06
FBgn0016697	Proteasome alpha5 subunit	Prosalpha5	CG10938	2R	884	2341.71	0.34415	0.0713963	4.82028	1.43359e-06	7.00124e-06
FBgn0035155	RabX6	RabX6	CG12015	3L	1286	603.627	0.190708	0.0395679	4.81975	1.43737e-06	7.01723e-06
FBgn0040395	Uncoordinated 76	Unc-76	CG3981	X	3825	10426.5	0.200922	0.0417125	4.81682	1.45867e-06	7.11623e-06
FBgn0030583	-	CG14410	CG14410	X	606	35.7666	0.911773	0.189341	4.8155	1.4683e-06	7.15817e-06
FBgn0040805	-	CG12355	CG12355	3L	1026	1656.34	0.343448	0.071363	4.81269	1.48912e-06	7.25709e-06
FBgn0023001	melted	melt	CG8624	3L	4366	507.764	0.478959	0.0995435	4.81156	1.4976e-06	7.29329e-06
FBgn0039226	Uracil-DNA degrading factor	Ude	CG18410	3R	1517	1143.28	0.355678	0.0740163	4.8054	1.54444e-06	7.51348e-06
FBgn0033199	-	CG17985	CG17985	2R	1479	747.31	0.192572	0.040105	4.8017	1.57321e-06	7.64809e-06
FBgn0031644	-	CG15625	CG15625	2L	1222	34.8562	1.49306	0.311015	4.80062	1.58172e-06	7.68407e-06
FBgn0034075	Aspartyl beta-hydroxylase	Asph	CG8421	2R	3986	2968.92	0.412057	0.0859774	4.79262	1.64616e-06	7.98592e-06
FBgn0028429	Inhibitor-2	I-2	CG10574	3L	1574	2642.15	0.185386	0.0386953	4.79092	1.66015e-06	8.05097e-06
FBgn0034514	-	CG13427	CG13427	2R	440	1.52729	2.19947	0.459262	4.78913	1.67504e-06	8.12035e-06
FBgn0033371	Concentrative nucleoside transporter 1	CNT1	CG11778	2R	2819	9.01133	1.12665	0.235332	4.78748	1.68887e-06	8.18455e-06
FBgn0035791	-	CG8539	CG8539	3L	1538	1369.9	0.651293	0.136095	4.78557	1.70506e-06	8.25721e-06
FBgn0031971	Starvation-upregulated protein	Sirup	CG7224	2L	727	9165.21	0.446654	0.0933525	4.7846	1.71327e-06	8.29408e-06
FBgn0017581	Lk6 kinase	Lk6	CG17342	3R	6281	93709.4	0.388509	0.0813581	4.77529	1.79445e-06	8.67496e-06
FBgn0030087	-	CG7766	CG7766	X	5032	11485.6	0.207859	0.0435506	4.77281	1.81676e-06	8.77668e-06
FBgn0037856	Leash	Leash	CG4674	3R	3180	885.084	0.221215	0.0463599	4.77168	1.82693e-06	8.81969e-06
FBgn0038590	-	CG12320	CG12320	3R	1666	363.551	0.224956	0.047192	4.76681	1.87162e-06	9.0264e-06
FBgn0038647	-	CG14302	CG14302	3R	281	6.1184	1.14595	0.24042	4.76647	1.87485e-06	9.03843e-06
FBgn0283476	Dynein heavy chain at 16F	Dhc16F	CG7092	X	12442	20.0947	1.17423	0.246415	4.76524	1.88628e-06	9.08721e-06
FBgn0038344	obelus	obe	CG5205	3R	6970	1027.36	0.268033	0.056255	4.76461	1.89215e-06	9.11231e-06
FBgn0041627	Ku80	Ku80	CG18801	2L	2304	436.61	0.507212	0.106462	4.76426	1.8955e-06	9.12529e-06
FBgn0032014	-	CG7840	CG7840	2L	1156	424.584	0.285647	0.0599618	4.76382	1.89964e-06	9.14201e-06
FBgn0036913	Ubiquitin specific protease 32	Usp32	CG8334	3L	6311	6300.9	0.155622	0.0326686	4.76365	1.90119e-06	9.1463e-06
FBgn0053099	-	CG33099	CG33099	3R	1248	124.219	1.03623	0.217534	4.76352	1.90241e-06	9.14901e-06
FBgn0266418	wide awake	wake	CG45058	3R	7092	4011.57	0.333876	0.0700986	4.76295	1.90787e-06	9.17209e-06
FBgn0032639	-	CG18563	CG18563	2L	1251	20.9237	1.11131	0.233357	4.76227	1.9143e-06	9.1998e-06
FBgn0024909	TBP-associated factor 7	Taf7	CG2670	3R	2261	363.682	0.26322	0.0553059	4.75934	1.94222e-06	9.32429e-06
FBgn0064225	Ribosomal protein L5	RpL5	CG17489	2L	3835	75259.9	0.281743	0.0592088	4.75846	1.95073e-06	9.35862e-06
FBgn0000139	absent, small, or homeotic discs 2	ash2	CG6677	3R	1949	1231.5	0.304973	0.0641181	4.75642	1.97054e-06	9.44716e-06
FBgn0025629	-	CG4045	CG4045	X	923	553.895	0.269336	0.0566785	4.75199	2.01428e-06	9.64014e-06
FBgn0000147	aurora A	aurA	CG3068	3R	1577	77.4673	0.52678	0.110875	4.7511	2.02315e-06	9.67595e-06
FBgn0263740	eukaryotic translation initiation factor 2 subunit gamma	eIF2gamma	CG43665	3R	2062	2971.95	0.179144	0.0377228	4.74895	2.04475e-06	9.77585e-06
FBgn0031782	WD repeat domain 79	WDR79	CG9226	2L	1724	386.165	0.260266	0.0548798	4.74247	2.11125e-06	1.00729e-05
FBgn0002466	sticky	sti	CG10522	3L	6084	60.4162	0.893553	0.18843	4.74209	2.11524e-06	1.00885e-05
FBgn0037354	-	CG12171	CG12171	3R	1014	2483.56	1.057	0.222956	4.74084	2.12837e-06	1.01477e-05
FBgn0051119	Histone deacetylase 11	HDAC11	CG31119	3R	1692	1034.83	0.519728	0.109761	4.7351	2.18945e-06	1.04317e-05
FBgn0029867	-	CG3847	CG3847	X	2134	1903.43	0.187356	0.0395792	4.7337	2.20469e-06	1.04971e-05
FBgn0026876	-	CG11403	CG11403	X	2890	196.879	0.344352	0.0727462	4.73362	2.20554e-06	1.04975e-05
FBgn0260990	yata	yata	CG1973	3R	4765	3797.62	0.160195	0.0338437	4.73339	2.20805e-06	1.05059e-05
FBgn0035772	Sh3beta	Sh3beta	CG8582	3L	2338	3596.76	0.203077	0.0429063	4.73304	2.2118e-06	1.05201e-05
FBgn0033174	-	CG11125	CG11125	2R	2177	197.152	0.451114	0.0953762	4.72983	2.24703e-06	1.06803e-05
FBgn0033112	Serpin 42Db	Spn42Db	CG9454	2R	1486	28.7332	1.089	0.230269	4.72926	2.2534e-06	1.07069e-05
FBgn0030993	Mec2	Mec2	CG7635	X	1238	348.78	0.945287	0.199902	4.72875	2.25907e-06	1.07302e-05
FBgn0032231	-	CG5056	CG5056	2L	1255	1026.44	0.197635	0.0418095	4.72703	2.27822e-06	1.08101e-05
FBgn0042178	Apollo	Apl	CG32165	3L	3825	1589.33	0.261772	0.0554498	4.72088	2.34825e-06	1.11157e-05
FBgn0259168	minibrain	mnb	CG42273	X	5507	2508.05	0.226185	0.0479164	4.72041	2.35365e-06	1.11374e-05
FBgn0031045	-	CG14212	CG14212	X	897	27.66	0.732227	0.15513	4.72007	2.35759e-06	1.11523e-05
FBgn0033297	Maltase A8	Mal-A8	CG8690	2R	1814	2.04861	2.18702	0.463609	4.71738	2.389e-06	1.1297e-05
FBgn0003248	Rhodopsin 2	Rh2	CG16740	3R	1365	11034.4	0.513153	0.10886	4.71387	2.4306e-06	1.14898e-05
FBgn0029589	-	CG14810	CG14810	X	720	3.29724	1.63606	0.347517	4.70784	2.5035e-06	1.18143e-05
FBgn0036565	-	CG5235	CG5235	3L	2711	64.2569	0.560311	0.119033	4.70721	2.51132e-06	1.18471e-05
FBgn0010226	Glutathione S transferase S1	GstS1	CG8938	2R	1764	6547.82	0.495118	0.105215	4.70576	2.52926e-06	1.19236e-05
FBgn0040963	-	CG18662	CG18662	2L	646	3.93267	1.35997	0.289086	4.70437	2.54653e-06	1.2001e-05
FBgn0027087	Histidyl-tRNA synthetase	HisRS	CG6335	X	2862	3069.47	0.26577	0.0565017	4.70375	2.55427e-06	1.20334e-05
FBgn0036738	-	CG7542	CG7542	3L	1155	9.20832	1.37127	0.291556	4.70327	2.5603e-06	1.20577e-05
FBgn0030431	-	CG4407	CG4407	X	1338	1122.48	0.266281	0.0566222	4.70276	2.56665e-06	1.20835e-05
FBgn0039411	dysfusion	dysf	CG32474	3R	4195	66.6389	0.570994	0.121419	4.70268	2.56771e-06	1.20844e-05
FBgn0035767	Cln7	Cln7	CG8596	3L	2114	1091.17	0.321693	0.0684207	4.7017	2.58004e-06	1.21383e-05
FBgn0037181	-	CG11370	CG11370	3L	1323	9.04107	1.6453	0.349995	4.70093	2.58979e-06	1.21759e-05
FBgn0031069	ATP binding cassette subfamily D member 3	Abcd3	CG12703	X	3185	10156.8	0.522003	0.111054	4.70043	2.5961e-06	1.22014e-05
FBgn0265184	-	CG44249	CG44249	2R	1490	147.499	0.374419	0.0796673	4.69979	2.60431e-06	1.22317e-05
FBgn0037270	eukaryotic translation initiation factor 3 subunit f1	eIF3f1	CG9769	3R	1301	10192.1	0.224272	0.0477689	4.69495	2.66677e-06	1.25166e-05
FBgn0034539	-	CG11159	CG11159	2R	656	11.0246	0.914735	0.195001	4.69093	2.71962e-06	1.27473e-05
FBgn0085277	-	CG34248	CG34248	3L	533	1.96589	2.06941	0.44125	4.68987	2.73377e-06	1.2805e-05
FBgn0022029	lethal (2) k01209	l(2)k01209	CG4798	2R	3254	1674.24	0.181501	0.0387071	4.68908	2.74432e-06	1.28501e-05
FBgn0038499	Brf RNA polymerase III subunit	Brf	CG31256	3R	2975	1257.04	0.151931	0.0324508	4.68187	2.84268e-06	1.33017e-05
FBgn0036014	-	CG3222	CG3222	3L	1354	5.49004	1.34089	0.286435	4.68131	2.85048e-06	1.33337e-05
FBgn0033554	Lsm10	Lsm10	CG12938	2R	543	65.9022	0.509222	0.108855	4.67797	2.89726e-06	1.35433e-05
FBgn0037007	-	BNIP3	CG5059	3L	1905	8289.93	0.389579	0.0833058	4.67649	2.91824e-06	1.36368e-05
FBgn0033889	-	CG6701	CG6701	2R	5354	3640.21	0.412263	0.0881698	4.67579	2.92828e-06	1.36745e-05
FBgn0264606	Fife	Fife	CG43955	3L	7459	10396.1	0.22668	0.0484805	4.6757	2.92952e-06	1.36757e-05
FBgn0035812	-	CG7457	CG7457	3L	6335	5590.64	0.555014	0.118745	4.67401	2.9537e-06	1.37747e-05
FBgn0029861	-	CG3815	CG3815	X	3232	893.334	0.176389	0.0377429	4.67344	2.962e-06	1.38087e-05
FBgn0002914	Myb oncogene-like	Myb	CG9045	X	2903	1996.45	0.171683	0.0367371	4.67329	2.96406e-06	1.38137e-05
FBgn0051741	-	CG31741	CG31741	2L	2046	1.48404	2.16207	0.462655	4.67317	2.96579e-06	1.38171e-05
FBgn0250871	papillote	pot	CG2467	X	4354	2993.51	0.284421	0.0608812	4.67174	2.98664e-06	1.39096e-05
FBgn0034366	Autophagy-related 7	Atg7	CG5489	2R	2395	714.945	0.321165	0.0687581	4.67093	2.99833e-06	1.39593e-05
FBgn0035397	Poly(A) specific ribonuclease subunit PAN3	PAN3	CG11486	3L	5010	9975.58	0.17545	0.0375661	4.67044	3.00554e-06	1.39882e-05
FBgn0035870	Gustatory receptor 66a	Gr66a	CG7189	3L	1584	59.4889	0.670272	0.14354	4.66959	3.01797e-06	1.40385e-05
FBgn0030506	DNA ligase 4	DNAlig4	CG12176	X	3040	623.465	0.200903	0.0430238	4.66957	3.01837e-06	1.40385e-05
FBgn0040080	partner of inscuteable	pins	CG5692	3R	3279	1869.55	0.18032	0.0386573	4.66457	3.09263e-06	1.43742e-05
FBgn0261567	-	CG42681	CG42681	2L	344	6.63405	1.56187	0.335075	4.66125	3.14288e-06	1.45882e-05
FBgn0033521	-	CG12896	CG12896	2R	848	628.382	0.891036	0.191198	4.66029	3.15767e-06	1.4647e-05
FBgn0039563	-	CG4951	CG4951	3R	1591	377.868	0.266935	0.0572946	4.65899	3.1777e-06	1.4735e-05
FBgn0259224	-	CG42324	CG42324	3L	5716	3443.27	0.254413	0.0546515	4.65519	3.23684e-06	1.49992e-05
FBgn0030925	Hayan	Hayan	CG6361	X	2408	998.428	0.390716	0.0839578	4.65372	3.25999e-06	1.51014e-05
FBgn0261985	Protein tyrosine phosphatase Meg	Ptpmeg	CG1228	3L	4116	6940.63	0.17525	0.0376585	4.65365	3.26111e-06	1.51016e-05
FBgn0039425	Aldolase 2	Ald2	CG5432	3R	1983	5.96807	1.51002	0.324549	4.65268	3.27646e-06	1.51676e-05
FBgn0259099	Doublecortin-domain-containing echinoderm-microtubule-associated protein	DCX-EMAP	CG42247	3L	4392	649.73	0.346747	0.0745487	4.65129	3.29872e-06	1.52604e-05
FBgn0031044	MAPK Phosphatase 4	MKP-4	CG14211	X	2358	1000.04	0.175209	0.0377107	4.64613	3.38212e-06	1.56254e-05
FBgn0038720	-	CG6231	CG6231	3R	3096	1974.27	0.375913	0.0809299	4.64492	3.402e-06	1.57068e-05
FBgn0083985	-	CG34149	CG34149	3R	1072	119.233	0.360063	0.077526	4.64442	3.41035e-06	1.57401e-05
FBgn0052687	-	CG32687	CG32687	X	2803	5269.86	0.441009	0.0950608	4.63923	3.49712e-06	1.61191e-05
FBgn0026418	Hsc70Cb	Hsc70Cb	CG6603	3L	3590	7290.18	0.352366	0.0759744	4.63796	3.51862e-06	1.62074e-05
FBgn0036895	male sterile (3) 76Cc	ms(3)76Cc	CG9392	3L	3746	44.2855	0.732595	0.158177	4.6315	3.63028e-06	1.6694e-05
FBgn0036518	Rho GTPase activating protein at 71E	RhoGAP71E	CG32149	3L	5854	3304.39	0.20468	0.0442209	4.62858	3.68179e-06	1.69196e-05
FBgn0011581	Myosuppressin	Ms	CG6440	3R	1065	7885.06	0.286353	0.0618955	4.62639	3.72099e-06	1.70884e-05
FBgn0030725	-	CG8958	CG8958	X	2006	59.7453	0.699222	0.151144	4.62619	3.72449e-06	1.70989e-05
FBgn0085471	-	CG34442	CG34442	2R	831	2.02226	1.8958	0.409937	4.62461	3.75307e-06	1.72244e-05
FBgn0036354	Proteome of centrioles 1	Poc1	CG10191	3L	1641	85.8193	0.794887	0.172091	4.61899	3.85619e-06	1.76859e-05
FBgn0020906	Jonah 25Bi	Jon25Bi	CG8867	2L	866	2.05924	2.18713	0.473591	4.61819	3.87101e-06	1.77421e-05
FBgn0010258	RNA-binding protein 4	Rbp4	CG9654	3R	1515	22.2335	0.702339	0.152147	4.61617	3.90878e-06	1.78916e-05
FBgn0036235	-	CG6938	CG6938	3L	4246	36.919	0.699906	0.151856	4.60903	4.0456e-06	1.85117e-05
FBgn0035879	GTPase activating protein and centrosome-associated	GAPcenA	CG7112	3L	4539	4617.53	0.151107	0.0327927	4.60794	4.06684e-06	1.85905e-05
FBgn0037008	mitochondrial transcription termination factor 3	mTerf3	CG5047	3L	1124	504.17	0.225656	0.0489743	4.60764	4.0727e-06	1.86112e-05
FBgn0051776	-	CG31776	CG31776	2L	1964	83.4932	1.03337	0.224342	4.60624	4.10016e-06	1.87243e-05
FBgn0017558	Pyruvate dehydrogenase kinase	Pdk	CG8808	2R	2732	14167.2	0.515626	0.111948	4.60594	4.10613e-06	1.87454e-05
FBgn0030055	Rubicon	Rubicon	CG12772	X	3278	1860	0.182475	0.0396227	4.60532	4.11836e-06	1.8795e-05
FBgn0031474	-	CG2991	CG2991	2L	3088	6455.92	0.171211	0.0371944	4.60313	4.16178e-06	1.89869e-05
FBgn0028692	Regulatory particle non-ATPase 2	Rpn2	CG11888	3R	3412	4146.95	0.247963	0.053907	4.59982	4.22861e-06	1.92854e-05
FBgn0037988	-	CG14740	CG14740	3R	1600	4.02211	1.57864	0.343359	4.59764	4.27296e-06	1.94813e-05
FBgn0039705	Autophagy-related 16	Atg16	CG31033	3R	2374	983.833	0.176922	0.0385029	4.59504	4.32672e-06	1.9707e-05
FBgn0036290	-	CG10638	CG10638	3L	1413	1859.61	0.714838	0.155666	4.59214	4.3873e-06	1.99608e-05
FBgn0029976	snazarus	snz	CG1514	X	5250	3771.04	0.152	0.0331004	4.59209	4.3882e-06	1.99608e-05
FBgn0030648	-	CG6340	CG6340	X	2177	4048.9	0.222309	0.0484365	4.5897	4.43891e-06	2.01782e-05
FBgn0015834	eukaryotic translation initiation factor 3 subunit i	eIF3i	CG8882	2L	1177	6912.39	0.236626	0.0515575	4.58956	4.44173e-06	2.01844e-05
FBgn0261555	-	CG42673	CG32048	3L	3902	2714.38	0.310016	0.0675674	4.58825	4.46985e-06	2.02988e-05
FBgn0036447	alpha-1,3-mannosyl-glycoprotein 4-beta-N-acetylglucosaminyltransferase b	Mgat4b	CG17173	3L	1581	29.9278	0.897208	0.195555	4.588	4.47507e-06	2.03159e-05
FBgn0034580	Chitinase 8	Cht8	CG9357	2R	1448	17.0664	0.774673	0.168988	4.58417	4.55783e-06	2.06713e-05
FBgn0023143	Ubiquitin activating enzyme 1	Uba1	CG1782	2R	4343	11178.8	0.142063	0.0310028	4.58226	4.59977e-06	2.08428e-05
FBgn0264894	-	CG44085	CG44085	2L	8804	8373	0.415246	0.0906296	4.5818	4.61001e-06	2.08806e-05
FBgn0050031	-	CG30031	CG30031	2R	811	2.369	1.86298	0.406669	4.58108	4.62584e-06	2.09387e-05
FBgn0031284	Post-GPI attachment to proteins 2	PGAP2	CG3876	2L	1370	819.333	0.216806	0.0473392	4.57983	4.6535e-06	2.10433e-05
FBgn0032637	-	CG5050	CG5050	2L	1314	60.8414	0.94621	0.206727	4.57711	4.71444e-06	2.13049e-05
FBgn0035358	-	CG14949	CG14949	3L	934	47.1466	1.15033	0.251414	4.57545	4.75191e-06	2.14672e-05
FBgn0031878	septin interacting protein 2	sip2	CG9188	2L	2223	10.9838	1.1526	0.251975	4.57429	4.77846e-06	2.15801e-05
FBgn0039315	-	CG13658	CG13658	3R	1334	423.846	1.14771	0.25103	4.57202	4.83049e-06	2.18009e-05
FBgn0031478	-	CG8814	CG8814	2L	1785	3208.87	0.244042	0.0534323	4.56731	4.94029e-06	2.22892e-05
FBgn0000257	carnation	car	CG12230	X	3173	1734.74	0.152545	0.033424	4.56395	5.02001e-06	2.26415e-05
FBgn0037843	-	CG4511	CG4511	3R	1452	1484.75	0.173567	0.038061	4.56022	5.10991e-06	2.30286e-05
FBgn0053346	-	CG33346	CG33346	3R	1096	9.84651	2.02739	0.444667	4.55934	5.13155e-06	2.3107e-05
FBgn0050480	-	CG30480	CG30480	2R	3460	31.2866	0.674629	0.147966	4.55936	5.13092e-06	2.3107e-05
FBgn0029503	morgana	mora	CG6198	3R	1241	534.506	0.431819	0.0947578	4.55708	5.18692e-06	2.33487e-05
FBgn0085212	-	CG34183	CG34183	2L	533	217.6	0.269412	0.0591274	4.55646	5.20227e-06	2.34026e-05
FBgn0037391	-	CG2017	CG2017	3R	2368	5191.29	0.310336	0.068136	4.55465	5.24723e-06	2.35972e-05
FBgn0015574	alpha-Esterase-6	alpha-Est6	CG1108	3R	1836	9.77509	1.09195	0.239802	4.55353	5.27521e-06	2.37154e-05
FBgn0036211	-	CG5946	CG5946	3L	2169	15182.4	0.373433	0.0820399	4.55185	5.31759e-06	2.38981e-05
FBgn0035911	-	CG6638	CG6638	3L	1514	704.224	0.38644	0.0849011	4.55164	5.32284e-06	2.3914e-05
FBgn0015008	alpha actinin 3	Actn3	CG8953	3R	1856	1.75093	2.09455	0.46056	4.54784	5.42e-06	2.43111e-05
FBgn0003655	swallow	swa	CG3429	X	2022	33.6935	0.731726	0.161086	4.54245	5.56055e-06	2.49012e-05
FBgn0051025	Protein phosphatase 1c interacting protein 1	Ppi1	CG31025	3R	3376	9.19276	1.43437	0.315966	4.53965	5.63476e-06	2.52242e-05
FBgn0001311	krotzkopf verkehrt	kkv	CG2666	3R	5524	106.784	0.643021	0.141668	4.53893	5.65416e-06	2.52959e-05
FBgn0040257	UDP-glycosyltransferase family 302 member E1	Ugt302E1	CG4739	3R	1595	45.6912	1.17987	0.259969	4.53852	5.66503e-06	2.53363e-05
FBgn0001942	eukaryotic translation initiation factor 4A	eIF4A	CG9075	2L	2021	67524.9	0.178095	0.039246	4.53791	5.68138e-06	2.54013e-05
FBgn0086657	I-kappaB kinase epsilon	IKKepsilon	CG2615	2L	2551	787.94	0.189034	0.0416643	4.53709	5.70365e-06	2.54844e-05
FBgn0036949	-	CG7290	CG7290	3L	1667	7.04838	1.50064	0.330778	4.53671	5.7139e-06	2.5522e-05
FBgn0024992	Paraplegin	Spg7	CG2658	X	3360	1803.78	0.184791	0.0407359	4.53632	5.72434e-06	2.55603e-05
FBgn0051041	-	CG31041	CG31041	3R	700	11.0738	1.22205	0.269602	4.53281	5.8203e-06	2.59637e-05
FBgn0036239	Pop2	Pop2	CG5684	3L	1893	3510.42	0.153629	0.0339032	4.5314	5.85932e-06	2.61294e-05
FBgn0003545	subito	sub	CG12298	2R	2460	3.49402	1.52101	0.336088	4.52562	6.02173e-06	2.68311e-05
FBgn0035229	pinstripe	pns	CG7852	3L	5610	5681.66	0.147702	0.0326371	4.5256	6.02247e-06	2.68311e-05
FBgn0052073	-	CG32073	CG32073	3L	575	1.72064	1.98124	0.438138	4.52196	6.12684e-06	2.72697e-05
FBgn0025549	unc-119	unc-119	CG1659	X	2340	2749.01	0.145947	0.0323053	4.51774	6.25043e-06	2.78109e-05
FBgn0284226	-	CG46310	CG46310	3R	3202	33.3936	0.663062	0.146798	4.51683	6.27736e-06	2.79128e-05
FBgn0051097	-	CG31097	CG31097	3R	1477	69.2871	1.01031	0.223692	4.51653	6.28598e-06	2.79332e-05
FBgn0261341	vermiform	verm	CG8756	3L	2255	1010.51	0.538142	0.119342	4.50923	6.50648e-06	2.88391e-05
FBgn0260482	-	CG32599	CG32599	X	1233	24.4061	1.0182	0.22586	4.50812	6.54047e-06	2.89805e-05
FBgn0262111	forked	f	CG42864	X	6422	154.642	0.619029	0.137385	4.50581	6.61202e-06	2.92881e-05
FBgn0038199	CCHamide-1	CCHa1	CG14358	3R	857	298.14	0.476333	0.105744	4.50458	6.65031e-06	2.94295e-05
FBgn0037623	-	CG9801	CG9801	3R	3476	2068.83	0.170466	0.0378492	4.50383	6.67388e-06	2.95244e-05
FBgn0031104	jean-baptiste	jb	CG15460	X	591	6.79337	1.52893	0.339889	4.49832	6.84912e-06	3.02513e-05
FBgn0035491	Dpy-30-like 2	Dpy-30L2	CG11591	3L	550	4.73033	1.62138	0.360489	4.49773	6.8682e-06	3.0326e-05
FBgn0027598	CIN85 and CD2AP related	cindr	CG31012	3R	4440	8813.81	0.279337	0.0621245	4.49641	6.91111e-06	3.0496e-05
FBgn0265101	suppressor-of-G2-allele-of-skp1	Sgt1	CG9617	3R	1085	1765.8	0.33972	0.075567	4.49561	6.9371e-06	3.0601e-05
FBgn0031851	Apoptosis antagonizing transcription factor	Aatf	CG11188	2L	1703	509.987	0.237415	0.052825	4.49438	6.97741e-06	3.07562e-05
FBgn0052675	Transport and Golgi organization 5	Tango5	CG32675	X	3141	5145.73	0.240621	0.0535698	4.49174	7.06449e-06	3.11134e-05
FBgn0033423	Alkaline phosphatase 6	Alp6	CG1809	2R	1686	67.3152	0.908773	0.202342	4.49128	7.07959e-06	3.117e-05
FBgn0023496	Lipase 1	Lip1	CG7279	2L	1681	71.9441	1.19395	0.266003	4.4885	7.17274e-06	3.155e-05
FBgn0035586	Fat storage inducing transmembrane protein	Fitm	CG10671	3L	1923	1720.77	0.350842	0.0781706	4.48816	7.18394e-06	3.15893e-05
FBgn0033639	-	CG9003	CG9003	2R	3810	4074.09	0.20667	0.0460531	4.48764	7.20158e-06	3.16568e-05
FBgn0036749	-	CG7460	CG7460	3L	2001	76.2794	0.78958	0.17595	4.48751	7.20592e-06	3.16658e-05
FBgn0000636	Fasciclin 3	Fas3	CG5803	2L	4084	3182.47	0.21842	0.048702	4.48482	7.29741e-06	3.20577e-05
FBgn0051719	RluA pseudouridine synthase 1	RluA-1	CG31719	2L	3207	2015.86	0.304654	0.0679326	4.48465	7.30324e-06	3.20731e-05
FBgn0035619	Alkaline phosphatase 10	Alp10	CG10592	3L	1749	10.8123	1.76742	0.394208	4.48347	7.34399e-06	3.22317e-05
FBgn0031652	jetlag	jet	CG8873	2L	1453	697.758	0.199196	0.0444661	4.47973	7.47366e-06	3.27801e-05
FBgn0025642	-	CG32812	CG32812	X	1599	34.5025	0.773539	0.172829	4.47575	7.61435e-06	3.33549e-05
FBgn0032474	DnaJ homolog	DnaJ-H	CG9828	2L	2035	5634.3	0.196831	0.044021	4.47131	7.77408e-06	3.40331e-05
FBgn0038674	-	CG14285	CG14285	3R	989	211.424	0.583006	0.130422	4.47016	7.81628e-06	3.4207e-05
FBgn0002673	twine	twe	CG4965	2L	2379	106.277	0.485542	0.108681	4.46759	7.9104e-06	3.45971e-05
FBgn0063495	Glutathione S transferase E5	GstE5	CG17527	2R	734	549.429	0.871929	0.195364	4.46309	8.07843e-06	3.53097e-05
FBgn0041225	Gustatory receptor 94a	Gr94a	CG31280	3R	1215	58.1727	0.849449	0.190345	4.46269	8.09381e-06	3.53658e-05
FBgn0053189	-	CG33189	CG33189	3R	677	78.8196	0.507648	0.113992	4.45338	8.45288e-06	3.68766e-05
FBgn0050000	Glutathione S transferase T1	GstT1	CG30000	2R	997	1158.74	0.355868	0.0799394	4.45172	8.51859e-06	3.71516e-05
FBgn0261587	-	CG42697	CG42697	2R	818	4.27482	1.11721	0.250978	4.4514	8.53111e-06	3.71945e-05
FBgn0031302	-	CG14340	CG14340	2L	1030	377.286	0.446278	0.100357	4.4469	8.71174e-06	3.79581e-05
FBgn0034860	-	CG9812	CG9812	2R	1574	9507.87	0.612415	0.137791	4.44453	8.80851e-06	3.83556e-05
FBgn0023083	frayed	fray	CG7693	3R	3628	4899.68	0.236932	0.0533439	4.4416	8.92922e-06	3.8869e-05
FBgn0020381	Death related ced-3/Nedd2-like caspase	Dredd	CG7486	X	1689	1069.91	0.241751	0.054466	4.43857	9.05589e-06	3.93957e-05
FBgn0030571	-	CG14414	CG14414	X	849	1040.93	0.346951	0.0781959	4.43695	9.12414e-06	3.9651e-05
FBgn0035238	-	CG12104	CG12104	3L	1398	827.683	0.256259	0.0577549	4.43701	9.12168e-06	3.9651e-05
FBgn0040227	eukaryotic translation initiation factor 3 subunit d1	eIF3d1	CG10161	3R	2012	4711.72	0.252587	0.0569287	4.43691	9.12604e-06	3.9651e-05
FBgn0051793	-	CG31793	CG31793	2L	4550	2350.2	0.469762	0.105963	4.43326	9.28174e-06	4.03023e-05
FBgn0286930	-	CG46427	CG46427	3R	1323	17.8514	0.985825	0.222377	4.43313	9.28765e-06	4.03153e-05
FBgn0035084	-	CG15861	CG15861	2R	1563	148.935	0.593535	0.133916	4.43213	9.33057e-06	4.0489e-05
FBgn0052495	Glutathione synthetase 2	Gss2	CG32495	X	2151	6081.77	0.538161	0.121487	4.42977	9.43341e-06	4.0884e-05
FBgn0037296	Proteasome beta2 subunit-related 2	Prosbeta2R2	CG12161	3R	1319	30.9711	0.762667	0.172334	4.42552	9.62111e-06	4.16845e-05
FBgn0004856	Bx42	Bx42	CG8264	X	2403	2149.55	0.142952	0.0323119	4.42413	9.68312e-06	4.194e-05
FBgn0036128	Elongase 68beta	Elo68beta	CG11801	3L	840	15.2054	1.20239	0.271791	4.42397	9.69032e-06	4.1945e-05
FBgn0000559	eukaryotic translation elongation factor 2	eEF2	CG2238	2L	3008	126971	0.223714	0.0505682	4.42401	9.68859e-06	4.1945e-05
FBgn0039488	-	CG6066	CG6066	3R	1556	267.62	0.239117	0.0540517	4.42386	9.69539e-06	4.19538e-05
FBgn0051347	-	CG31347	CG31347	3R	865	91.7172	0.571502	0.129201	4.42335	9.71812e-06	4.20391e-05
FBgn0035496	-	CG14990	CG14990	3L	1072	36.34	1.53049	0.346204	4.42078	9.83432e-06	4.25152e-05
FBgn0013983	immune deficiency	imd	CG5576	2R	1518	1004.32	0.260272	0.0589238	4.4171	1.00036e-05	4.32067e-05
FBgn0039873	Sodium-dependent multivitamin transporter	Smvt	CG2191	3R	1996	1.53626	2.11979	0.480408	4.41247	1.02197e-05	4.40987e-05
FBgn0037307	Tim17a2	Tim17a2	CG14666	3R	991	10.1179	0.900167	0.204221	4.4078	1.04425e-05	4.50182e-05
FBgn0038485	-	CG5255	CG5255	3R	914	11.3219	1.95651	0.443887	4.40769	1.04479e-05	4.50273e-05
FBgn0035092	Neuropeptide-like precursor 1	Nplp1	CG3441	2R	2695	7269.47	0.262214	0.0595036	4.40669	1.04965e-05	4.52085e-05
FBgn0038577	-	CG12321	CG12321	3R	903	779.644	0.43573	0.0988984	4.40584	1.05375e-05	4.53713e-05
FBgn0000376	cramped	crm	CG2714	X	3837	1185.63	0.126463	0.0287105	4.40478	1.0589e-05	4.55647e-05
FBgn0026144	sarcoplasmic calcium-binding protein	CBP	CG1435	X	2225	105.362	0.639471	0.145211	4.40373	1.06404e-05	4.57575e-05
FBgn0014184	Ornithine decarboxylase antizyme	Oda	CG16747	2R	1909	77574.2	0.200957	0.0456457	4.40254	1.0699e-05	4.59951e-05
FBgn0031412	-	CG16995	CG16995	2L	721	7.79481	1.28733	0.292549	4.40039	1.08057e-05	4.64248e-05
FBgn0020647	Krueppel target at 95D	KrT95D	CG5405	3R	5687	7820.78	0.198011	0.0450125	4.39903	1.08738e-05	4.66885e-05
FBgn0036994	-	CG5199	CG5199	3L	1643	374.713	0.221241	0.0503245	4.39628	1.1012e-05	4.72381e-05
FBgn0002905	DNA polymerase theta	PolQ	CG6019	3R	6420	425.185	0.597998	0.136058	4.39515	1.10694e-05	4.74698e-05
FBgn0000520	deformed wings	dwg	CG2711	X	2002	805.166	0.261351	0.0594736	4.3944	1.11081e-05	4.76061e-05
FBgn0026749	Yippee	Yippee	CG1989	X	1293	1943.43	0.196933	0.0448256	4.39332	1.11631e-05	4.78122e-05
FBgn0024740	Lipase 2	Lip2	CG17116	2L	2184	603.448	0.847721	0.193168	4.38852	1.14124e-05	4.8835e-05
FBgn0051219	-	CG31219	CG31219	3R	1139	5.15758	1.35706	0.309235	4.38842	1.14175e-05	4.88414e-05
FBgn0034429	Arylalkylamine N-acetyltransferase-like 4	AANATL4	CG18607	2R	744	1.31947	2.07384	0.472619	4.38798	1.14408e-05	4.89261e-05
FBgn0052557	Multicopper oxidase 4	Mco4	CG32557	X	2131	7.79065	1.38194	0.315016	4.38688	1.14986e-05	4.91428e-05
FBgn0260453	-	CG17140	CG17140	2L	2398	5.07229	1.56783	0.357499	4.38555	1.15693e-05	4.94148e-05
FBgn0032136	Apolipoprotein lipid transfer particle	Apoltp	CG15828	2L	13330	13083.9	0.421553	0.0961611	4.38382	1.16615e-05	4.97932e-05
FBgn0036740	Vacuolar protein sorting 60	Vps60	CG6259	3L	1100	3042.02	0.193959	0.0442485	4.38341	1.16834e-05	4.9871e-05
FBgn0041210	Histone deacetylase 4	HDAC4	CG1770	X	6876	6481.51	0.162685	0.037118	4.38291	1.17104e-05	4.99711e-05
FBgn0001612	Gamma-tubulin ring protein 91	Grip91	CG10988	X	3571	996.429	0.207404	0.0473412	4.38105	1.18109e-05	5.03535e-05
FBgn0031608	-	CG15435	CG15435	2L	1948	249.495	0.202202	0.0461673	4.37977	1.18806e-05	5.05883e-05
FBgn0025630	RNA 3'-terminal phosphate cyclase	Rtca	CG4061	X	2070	779.09	0.415423	0.0948691	4.37891	1.19275e-05	5.07726e-05
FBgn0085354	-	CG34325	CG34325	X	1252	1705.99	0.383512	0.0875857	4.3787	1.19389e-05	5.08055e-05
FBgn0030307	-	CG33235	CG33235	X	5028	3.3109	1.31012	0.299383	4.37606	1.20843e-05	5.14085e-05
FBgn0265342	Cytochrome c oxidase subunit 7C-like	COX7CL	CG44296	2R	410	9.25901	1.10615	0.25285	4.37472	1.21587e-05	5.16907e-05
FBgn0011824	-	CG4038	CG4038	2R	957	428.239	0.280246	0.0641017	4.3719	1.23171e-05	5.23026e-05
FBgn0039696	R and B	Rnb	CG7837	3R	3158	817.408	0.373399	0.0855353	4.36544	1.26864e-05	5.38542e-05
FBgn0044011	Serpin 43Ad	Spn43Ad	CG1859	2R	1432	354.287	0.839371	0.192331	4.3642	1.27592e-05	5.41463e-05
FBgn0035476	-	CG12766	CG12766	3L	1075	219.049	1.25657	0.28815	4.36082	1.29576e-05	5.49497e-05
FBgn0051087	-	CG31087	CG31087	3R	1458	3.45422	1.64615	0.377579	4.35975	1.30212e-05	5.51738e-05
FBgn0003382	shavenoid	sha	CG13209	2R	6113	5.31248	1.09037	0.250124	4.35933	1.30462e-05	5.52631e-05
FBgn0263607	lethal (3) 72Dp	l(3)72Dp	CG32155	3L	2517	1467.24	0.492628	0.113093	4.35595	1.3249e-05	5.61049e-05
FBgn0030051	Serine Protease Immune Response Integrator	spirit	CG2056	X	1595	851.522	0.606249	0.139244	4.35387	1.33757e-05	5.66069e-05
FBgn0011769	Ferredoxin 1	Fdx1	CG4205	3L	723	406.242	0.276298	0.0635197	4.34979	1.36267e-05	5.75985e-05
FBgn0265413	-	CG44325	CG44325	X	1399	4244.22	0.375077	0.0862732	4.34755	1.37666e-05	5.81546e-05
FBgn0038246	-	CG14853	CG14853	3R	2617	4435.34	0.211519	0.0486921	4.34401	1.39903e-05	5.90635e-05
FBgn0034121	-	CG6262	CG6262	2R	3417	4.32728	1.66205	0.382687	4.34311	1.40478e-05	5.92523e-05
FBgn0034069	-	CG8401	CG8401	2R	1053	439.394	0.481504	0.110916	4.34117	1.41723e-05	5.97591e-05
FBgn0038221	Intraflagellar transport 54	IFT54	CG3259	3R	1843	59.7604	0.61635	0.142015	4.34004	1.42458e-05	6.00507e-05
FBgn0030691	EF-hand domain containing 1.1	Efhc1.1	CG8959	X	2559	95.8117	0.560509	0.129167	4.3394	1.42874e-05	6.02077e-05
FBgn0036309	Huntingtin interacting protein 1	Hip1	CG10971	3L	4099	1459.86	0.264709	0.061044	4.33636	1.44864e-05	6.09908e-05
FBgn0035138	-	CG13884	CG13884	3L	774	24.4102	0.774136	0.178813	4.32932	1.49573e-05	6.28588e-05
FBgn0041224	Gustatory receptor 97a	Gr97a	CG33083	3R	1311	31.8488	1.26276	0.291702	4.32895	1.49824e-05	6.29261e-05
FBgn0003346	Ran GTPase activating protein	RanGAP	CG9999	2L	2401	552.849	0.400488	0.0925137	4.32896	1.49813e-05	6.29261e-05
FBgn0010241	Multi drug resistance 50	Mdr50	CG8523	2R	4256	2103.74	1.90218	0.439483	4.32823	1.50312e-05	6.30926e-05
FBgn0031144	-	CG1529	CG1529	X	3246	975.096	0.181534	0.0419889	4.32337	1.5366e-05	6.44592e-05
FBgn0005683	pineapple eye	pie	CG5354	2L	2089	84.2301	0.409168	0.0947275	4.31942	1.5644e-05	6.5546e-05
FBgn0043854	slow as molasses	slam	CG9506	2L	4117	147.009	1.1445	0.265025	4.31844	1.57133e-05	6.57767e-05
FBgn0035903	-	CG6765	CG6765	3L	3451	1780.45	0.21247	0.0492483	4.31425	1.60144e-05	6.69966e-05
FBgn0030321	-	CG1703	CG1703	X	3059	1776.71	0.274911	0.063723	4.31415	1.60218e-05	6.70072e-05
FBgn0039335	Vacuolar protein sorting 33B	Vps33B	CG5127	3R	2091	601.507	0.251305	0.0582672	4.31297	1.61077e-05	6.73462e-05
FBgn0034085	Protein tyrosine phosphatase 52F	Ptp52F	CG18243	2R	4589	123.429	0.631069	0.146379	4.3112	1.62369e-05	6.78044e-05
FBgn0024329	Mekk1	Mekk1	CG7717	3R	5452	3083.1	0.218582	0.0507028	4.31106	1.62477e-05	6.78294e-05
FBgn0034577	capping protein alpha	cpa	CG10540	2R	1918	1912.26	0.148415	0.0344385	4.30957	1.63573e-05	6.82662e-05
FBgn0027949	msb1l	msb1l	CG10364	2L	1366	4.64165	1.5	0.348543	4.30363	1.68025e-05	7.00189e-05
FBgn0038258	-	CG7362	CG7362	3R	2654	4.23955	1.35314	0.314824	4.29807	1.72293e-05	7.1711e-05
FBgn0039503	-	CG14262	CG14262	3R	1004	8.3706	0.920879	0.214344	4.29627	1.73695e-05	7.2273e-05
FBgn0031321	tRNA-guanine transglycosylase	Tgt	CG4947	2L	1566	319.006	0.267791	0.062333	4.29614	1.73799e-05	7.22945e-05
FBgn0026371	Sak kinase	SAK	CG7186	3L	3371	373.316	0.243699	0.0567299	4.29577	1.74087e-05	7.23928e-05
FBgn0051493	-	CG31493	CG31493	3R	1005	2.58928	1.57115	0.365928	4.29362	1.75786e-05	7.30554e-05
FBgn0024947	NTPase	NTPase	CG3059	2L	2291	5669.25	0.223597	0.0521002	4.29168	1.77325e-05	7.36727e-05
FBgn0019828	don juan	dj	CG1980	3R	1209	3.28871	1.56427	0.364557	4.29088	1.77966e-05	7.39171e-05
FBgn0028379	farinelli	fan	CG7919	3L	912	9.4222	1.30035	0.303145	4.28954	1.79047e-05	7.42769e-05
FBgn0003205	Ras oncogene at 85D	Ras85D	CG9375	3R	1958	4011.24	0.117517	0.0274187	4.28602	1.81906e-05	7.53501e-05
FBgn0032719	-	CG17321	CG17321	2L	2624	2810.46	0.131459	0.0306827	4.28446	1.83184e-05	7.58569e-05
FBgn0034447	-	CG7744	CG7744	2R	2585	281.045	0.268183	0.0626152	4.28303	1.84365e-05	7.63231e-05
FBgn0032140	-	CG13117	CG13117	2L	1305	3222.88	0.824751	0.192576	4.28273	1.84618e-05	7.64049e-05
FBgn0039464	-	CG6330	CG6330	3R	2075	7594	0.327393	0.0764841	4.28053	1.8645e-05	7.71401e-05
FBgn0042175	-	CG18858	CG18858	2L	2029	4922.78	0.654215	0.152846	4.28024	1.86693e-05	7.72176e-05
FBgn0029827	-	CG6048	CG6048	X	1158	4.14341	1.63341	0.381713	4.27917	1.87594e-05	7.75674e-05
FBgn0030753	rings lost	rngo	CG4420	X	2216	1818.26	0.2114	0.0494074	4.27872	1.87972e-05	7.76773e-05
FBgn0039023	Neprilysin-like 14	Nepl14	CG4723	3R	2272	1200.9	0.508453	0.118856	4.27788	1.88677e-05	7.79222e-05
FBgn0035413	-	CG14958	CG14958	3L	541	1.1029	2.00022	0.467726	4.27648	1.89868e-05	7.83672e-05
FBgn0039266	-	CG11791	CG11791	3R	1906	3747.85	0.175674	0.0410832	4.27606	1.90231e-05	7.84938e-05
FBgn0029993	-	CG1571	CG1571	X	2301	12.7818	1.11068	0.260004	4.27178	1.93917e-05	7.99909e-05
FBgn0051161	-	CG31161	CG31161	3R	1666	130.382	0.411199	0.0963102	4.26952	1.95891e-05	8.07328e-05
FBgn0032499	UV-resistance associated gene	Uvrag	CG6116	2L	2520	1443.22	0.131067	0.0307094	4.26798	1.97251e-05	8.12693e-05
FBgn0035360	-	CG1246	CG1246	3L	1840	37.8687	0.745598	0.174737	4.26697	1.98147e-05	8.15901e-05
FBgn0000318	clot	cl	CG11024	2L	689	4236.91	0.296104	0.0694133	4.26581	1.99178e-05	8.19659e-05
FBgn0037231	Vacuolar protein sorting 24	Vps24	CG9779	3R	3326	3869.72	0.135943	0.0318975	4.26187	2.02722e-05	8.33253e-05
FBgn0285955	crossveinless c	cv-c	CG34389	3R	9298	5381.17	0.212148	0.0498056	4.25953	2.04857e-05	8.41528e-05
FBgn0042103	-	CG18746	CG18746	3R	1487	1.42272	2.03407	0.477546	4.25942	2.04959e-05	8.41698e-05
FBgn0003377	Salivary gland secretion 7	Sgs7	CG18087	3L	321	1.03677	1.96929	0.462713	4.25596	2.08156e-05	8.54573e-05
FBgn0039722	Capability	Capa	CG15520	3R	695	2730.21	0.33875	0.079619	4.25465	2.09381e-05	8.58332e-05
FBgn0033518	Peroxiredoxin 2540-2	Prx2540-2	CG11765	2R	856	2240.46	1.02592	0.241242	4.25265	2.11251e-05	8.65743e-05
FBgn0031690	-	CG7742	CG7742	2L	2119	154.757	0.96571	0.227251	4.24954	2.1421e-05	8.77611e-05
FBgn0033389	Rad51 recombinase D	Rad51D	CG2412	2R	1918	125.541	0.303354	0.0714784	4.24399	2.1958e-05	8.98015e-05
FBgn0030151	-	CG1354	CG1354	X	1684	3062.32	0.29862	0.0704056	4.24142	2.22108e-05	9.07821e-05
FBgn0003250	Rhodopsin 4	Rh4	CG9668	3L	1349	67422.3	0.376069	0.0886851	4.2405	2.23024e-05	9.11025e-05
FBgn0262140	-	CG42866	CG42866	2L	403	9.03914	1.20574	0.284415	4.23936	2.24154e-05	9.15104e-05
FBgn0052703	Extracellularly regulated kinase 7	Erk7	CG32703	X	3721	6.85747	1.21619	0.287015	4.23738	2.2614e-05	9.22941e-05
FBgn0030598	-	CG9503	CG9503	X	2524	9.25401	0.893388	0.210857	4.23694	2.26588e-05	9.24221e-05
FBgn0033598	Cuticular protein 47Eb	Cpr47Eb	CG13224	2R	817	1.54653	2	0.472318	4.23445	2.29115e-05	9.33979e-05
FBgn0040091	UDP-glycosyltransferase family 317 member A1	Ugt317A1	CG4414	2R	1864	399.354	0.775201	0.183069	4.23448	2.29078e-05	9.33979e-05
FBgn0030501	BthD selenoprotein	BthD	CG11177	X	977	19.9221	0.920717	0.217496	4.23325	2.30337e-05	9.38409e-05
FBgn0052037	-	CG32037	CG32037	3L	1836	331.397	1.12135	0.264922	4.23274	2.30859e-05	9.40261e-05
FBgn0000042	Actin 5C	Act5C	CG4027	X	2863	55872.9	0.294956	0.0696882	4.23251	2.31097e-05	9.40951e-05
FBgn0036059	nudE	nudE	CG8104	3L	2133	3861.76	0.140972	0.0333126	4.2318	2.31833e-05	9.43672e-05
FBgn0003319	Stubble	Sb	CG4316	3R	4025	82.1353	0.621771	0.146985	4.23018	2.33508e-05	9.50212e-05
FBgn0033855	link	link	CG13333	2R	1394	14.1437	1.24459	0.294285	4.22919	2.34536e-05	9.53833e-05
FBgn0029835	-	CG5921	CG5921	X	4361	624.486	0.354083	0.0837223	4.22925	2.34473e-05	9.53833e-05
FBgn0010803	Tryptophanyl-tRNA synthetase	TrpRS	CG9735	3R	1683	1133.36	0.150704	0.0356664	4.22538	2.38543e-05	9.69561e-05
FBgn0040687	-	CG14645	CG14645	3R	409	2.68076	1.29031	0.305714	4.22064	2.43612e-05	9.89295e-05
FBgn0032601	yellow-b	yellow-b	CG17914	2L	1839	941.057	0.43328	0.102676	4.21988	2.44437e-05	9.92062e-05
FBgn0266668	Exocyst 84	Exo84	CG6095	3R	2246	1383.99	0.132448	0.0313941	4.21887	2.45529e-05	9.96205e-05
FBgn0043841	virus-induced RNA 1	vir-1	CG31764	2L	1849	41164.2	0.513132	0.121672	4.21735	2.47195e-05	0.000100267
FBgn0085213	-	CG34184	CG34184	2R	715	2.288	1.78813	0.424214	4.21517	2.49594e-05	0.000101122
FBgn0030932	gamma-glutamyl transpeptidase	Ggt-1	CG6461	X	2396	1526.04	0.479257	0.113718	4.21442	2.50421e-05	0.000101397
FBgn0034942	-	CG13566	CG13566	2R	917	46.9292	0.905091	0.214783	4.21398	2.50914e-05	0.000101538
FBgn0266709	Zinc finger MYND-type containing 10	Zmynd10	CG11253	3L	1497	23.7275	0.715376	0.169806	4.2129	2.52112e-05	0.000101993
FBgn0014465	Chorion protein b at 7F	Cp7Fb	CG15350	X	2093	66.7985	0.836309	0.19857	4.21166	2.53505e-05	0.000102497
FBgn0050485	-	CG30485	CG30485	2R	3102	12.7555	1.31207	0.311548	4.21144	2.53753e-05	0.000102567
FBgn0037068	Cuticular protein 78Cb	Cpr78Cb	CG7663	3L	2124	5.76428	1.02859	0.244439	4.20797	2.5767e-05	0.000104059
FBgn0052644	Mucin related 11Da	Mur11Da	CG32644	X	2012	1.32993	1.72482	0.410592	4.20081	2.65963e-05	0.000107283
FBgn0085442	Na,K-ATPase Interacting	NKAIN	CG34413	2R	4657	7266.36	0.124463	0.0296398	4.19919	2.67877e-05	0.00010793
FBgn0030003	-	CG2116	CG2116	X	1972	732.156	0.156863	0.0374004	4.19415	2.73891e-05	0.000110264
FBgn0003495	spatzle	spz	CG6134	3R	2128	2310.72	0.428808	0.102252	4.19365	2.74505e-05	0.000110439
FBgn0037883	Diphthamide biosynthesis 3	Dph3	CG14701	3R	487	229.655	0.329148	0.078512	4.19233	2.7611e-05	0.000111021
FBgn0010173	Replication Protein A 70	RpA-70	CG9633	3R	2135	1823.22	0.31178	0.0743806	4.19168	2.76892e-05	0.000111303
FBgn0034937	fizzy-related 2	fzr2	CG16783	2R	1450	43.3023	0.558495	0.133289	4.1901	2.78832e-05	0.000111985
FBgn0022981	ripped pocket	rpk	CG1058	3R	2536	2.88748	1.59574	0.380849	4.18995	2.79013e-05	0.000112025
FBgn0034598	-	CG4266	CG4266	2R	4662	4418.06	0.131958	0.0315058	4.18838	2.80948e-05	0.000112737
FBgn0001255	Ecdysone-inducible gene E3	ImpE3	CG2723	3R	1094	28.3652	0.558365	0.133349	4.18724	2.82368e-05	0.000113241
FBgn0030946	-	CG6659	CG6659	X	3426	2121.23	0.116875	0.0279201	4.18608	2.83819e-05	0.00011379
FBgn0264988	-	CG44139	CG44139	2L	245	1.50858	1.69478	0.404948	4.18518	2.84946e-05	0.000114209
FBgn0033408	-	CG8800	CG8800	2R	759	8.09859	1.10711	0.26459	4.18424	2.86125e-05	0.000114649
FBgn0036828	pre-mRNA processing factor 6	Prp6	CG6841	3L	3382	1226.64	0.158904	0.0379786	4.18404	2.86368e-05	0.000114713
FBgn0036376	Liprin-beta	Liprin-beta	CG10743	3L	2813	1784.45	0.134009	0.0320328	4.1835	2.87056e-05	0.000114955
FBgn0037710	-	CG9393	CG9393	3R	1589	602.603	0.196669	0.047017	4.18294	2.8776e-05	0.000115204
FBgn0038330	-	CG14868	CG14868	3R	1844	1468.62	0.178749	0.0427343	4.18279	2.8795e-05	0.000115246
FBgn0039403	Sld5	Sld5	CG14549	3R	773	51.292	0.552061	0.132042	4.18093	2.90317e-05	0.000116127
FBgn0051357	Katazuke	Kaz	CG31357	3R	1681	1603.72	0.161668	0.038682	4.17941	2.92268e-05	0.00011684
FBgn0040651	-	CG15458	CG15458	X	486	3.40125	1.44102	0.344808	4.1792	2.9253e-05	0.000116911
FBgn0037432	-	CG10298	CG10298	3R	745	39.0074	0.600012	0.143618	4.17782	2.94319e-05	0.000117558
FBgn0025702	Serine-arginine protein kinase at 79D	Srpk79D	CG11489	3L	4765	3871.07	0.239514	0.0573323	4.17765	2.94541e-05	0.000117589
FBgn0261681	-	CG42728	CG42728	3L	577	2.17668	1.62549	0.389307	4.17533	2.97551e-05	0.000118712
FBgn0039631	Sirtuin 7	Sirt7	CG11305	3R	3058	507.039	0.227305	0.0544649	4.17342	3.00062e-05	0.000119679
FBgn0004401	Protein on ecdysone puffs	Pep	CG6143	3L	2792	14191.4	0.156876	0.0376012	4.1721	3.01803e-05	0.000120339
FBgn0037442	godzilla E3 ubiquitin protein ligase	gzl	CG10277	3R	3378	7385.14	0.120536	0.0289125	4.169	3.05935e-05	0.000121847
FBgn0039297	-	CG11852	CG11852	3R	1045	236.179	0.724539	0.173808	4.16862	3.06446e-05	0.000121958
FBgn0000709	flightless I	fliI	CG1484	X	4827	1999.93	0.11224	0.0269251	4.1686	3.06478e-05	0.000121958
FBgn0038038	Saccheropin dehydrogenase 2	Sccpdh2	CG5167	3R	1576	5133.33	0.413975	0.0993374	4.16737	3.08137e-05	0.000122583
FBgn0034095	-	CG15701	CG15701	2R	3367	149.156	0.418743	0.100493	4.16687	3.0881e-05	0.000122815
FBgn0085370	Phosphodiesterase 11	Pde11	CG34341	2L	6515	5885.69	0.190667	0.0458614	4.15747	3.21788e-05	0.00012772
FBgn0266019	rudhira	rudhira	CG43154	X	9133	10776.2	0.204391	0.0491683	4.15696	3.22506e-05	0.000127968
FBgn0034662	-	CG13492	CG13492	2R	9183	5.04511	1.63196	0.392925	4.15335	3.27637e-05	0.000129884
FBgn0032003	-	CG8349	CG8349	2L	928	0.994735	1.83376	0.441611	4.15242	3.28974e-05	0.000130348
FBgn0260440	sanpodo	spdo	CG31020	3R	2087	34.9184	0.777958	0.187383	4.1517	3.30008e-05	0.000130683
FBgn0011236	ken and barbie	ken	CG5575	2R	3070	925.667	0.321285	0.0773902	4.15149	3.30314e-05	0.000130767
FBgn0267967	corolla	corolla	CG8316	X	1984	4.50823	1.30228	0.313716	4.15115	3.30811e-05	0.000130927
FBgn0026563	-	CG1979	CG1979	3R	3425	505.433	0.870026	0.209683	4.14925	3.33567e-05	0.000131979
FBgn0032135	Glucuronyltransferase S	GlcAT-S	CG3881	2L	2406	3284.62	0.205696	0.0495956	4.14747	3.36172e-05	0.000132896
FBgn0030581	-	CG14408	CG14408	X	3227	5941.37	0.173062	0.0417265	4.14753	3.36079e-05	0.000132896
FBgn0030790	-	CG4768	CG4768	X	3669	2348.02	0.158786	0.0382917	4.14674	3.37235e-05	0.000133279
FBgn0030984	twiggy	tgy	CG7440	X	1590	4.91709	1.21424	0.292905	4.1455	3.39069e-05	0.000133889
FBgn0034534	maf-S	maf-S	CG9954	2R	646	2772.3	0.186767	0.0450617	4.1447	3.40264e-05	0.000134284
FBgn0037074	TBC1 domain family member 8/9	Tbc1d8-9	CG7324	3L	4540	7321.04	0.143579	0.0346494	4.14375	3.41673e-05	0.000134763
FBgn0034142	-	CG8306	CG8306	2R	2211	5130.1	0.404956	0.0980064	4.13193	3.59727e-05	0.000141602
FBgn0261535	lethal (2) 34Fd	l(2)34Fd	CG7516	2L	2321	506.34	0.385839	0.0934246	4.12995	3.62839e-05	0.000142746
FBgn0036056	-	CG6709	CG6709	3L	1331	34.4841	0.813011	0.196927	4.12849	3.65149e-05	0.000143614
FBgn0030643	-	CG15641	CG15641	X	413	7.36152	1.21236	0.29367	4.12829	3.65466e-05	0.000143698
FBgn0031730	-	CG7236	CG7236	2L	1739	132.473	0.433679	0.105096	4.12652	3.68288e-05	0.000144726
FBgn0038533	-	CG7523	CG7523	3R	1134	1404.4	0.406322	0.0984708	4.12632	3.68608e-05	0.00014481
FBgn0010359	gammaTrypsin	gammaTry	CG30028	2R	810	1.53422	1.94591	0.471973	4.12292	3.74092e-05	0.000146757
FBgn0053258	-	CG33258	CG33258	3L	964	12.0311	1.08876	0.264081	4.12283	3.74246e-05	0.000146776
FBgn0033324	-	CG14744	CG14744	2R	2675	1.62131	1.72492	0.418907	4.11767	3.82716e-05	0.000150012
FBgn0027836	Dgp-1	Dgp-1	CG5729	2R	2799	7059.33	1.10178	0.267752	4.11494	3.87287e-05	0.000151718
FBgn0028504	-	CG12182	CG12182	3L	3493	381.369	0.230104	0.0559225	4.1147	3.87688e-05	0.000151833
FBgn0027066	Eb1	Eb1	CG3265	2R	2043	7414.2	0.176113	0.0428432	4.11065	3.94554e-05	0.000154391
FBgn0262000	-	CG42818	CG42818	2L	3500	1.7991	1.62428	0.395269	4.10931	3.96845e-05	0.000155199
FBgn0037781	Fancl	Fancl	CG12812	3R	1248	7.67867	1.18094	0.287749	4.10408	4.05924e-05	0.000158571
FBgn0031653	Jonah 25Biii	Jon25Biii	CG8871	2L	827	6.41928	1.63997	0.400202	4.09786	4.16996e-05	0.000162393
FBgn0001220	Heat shock protein cognate 5	Hsc70-5	CG8542	2R	2922	12105.1	0.183408	0.0447678	4.09687	4.18767e-05	0.000162991
FBgn0267351	Topoisomerase I-interacting protein	Topors	CG15104	2R	4298	1311.14	0.137935	0.0336678	4.09694	4.18654e-05	0.000162991
FBgn0033789	-	CG13324	CG13324	2R	511	3.57453	1.668	0.407435	4.09391	4.24165e-05	0.000164814
FBgn0025582	eukaryotic translation initiation factor 3 subunit e	eIF3e	CG9677	3L	1520	6081.67	0.248487	0.0607234	4.09212	4.27451e-05	0.000165951
FBgn0034999	Fatty acid transport protein 3	Fatp3	CG3394	2R	2357	1223	0.535013	0.130747	4.09196	4.27737e-05	0.000166016
FBgn0032593	Transient receptor potential cation channel gamma	Trpgamma	CG5996	2L	5274	74.6641	0.450882	0.110198	4.09156	4.28473e-05	0.000166255
FBgn0037622	-	CG8202	CG8202	3R	3092	980.513	0.163572	0.0399835	4.09098	4.29551e-05	0.00016658
FBgn0031826	-	CG9550	CG9550	2L	1298	6.96561	1.23693	0.302418	4.09012	4.31152e-05	0.000167154
FBgn0030290	-	CG11756	CG11756	X	746	6.91819	1.03784	0.253795	4.08929	4.32689e-05	0.000167703
FBgn0024238	Fimbrin	Fim	CG8649	X	3387	6939.6	0.153159	0.0374609	4.08849	4.34191e-05	0.000168239
FBgn0015591	Allatostatin A	AstA	CG13633	3R	1459	2546.84	0.241121	0.0590444	4.08373	4.43176e-05	0.000171528
FBgn0032804	-	CG13081	CG13081	2L	817	4.89323	1.38449	0.339301	4.08041	4.49561e-05	0.000173844
FBgn0033484	-	CG2269	CG2269	2R	3834	28616.4	0.204708	0.0501692	4.08036	4.49662e-05	0.000173844
FBgn0031008	-	CG8010	CG8010	X	1633	910.204	0.381147	0.0934173	4.08005	4.50264e-05	0.000174028
FBgn0032175	-	CG13131	CG13131	2L	4130	2.7794	1.51869	0.372231	4.07995	4.50445e-05	0.00017405
FBgn0038470	-	CG18213	CG18213	3R	2997	144.051	0.609855	0.149535	4.07835	4.53562e-05	0.000175157
FBgn0034565	-	CG15650	CG15650	2R	1152	7.56078	0.96315	0.236191	4.07784	4.54562e-05	0.000175485
FBgn0035239	-	CG18170	CG18170	3L	5663	62.5149	0.958404	0.23509	4.07675	4.56699e-05	0.000176221
FBgn0053177	-	CG33177	CG33177	X	862	89.3586	0.867555	0.212985	4.07331	4.63497e-05	0.000178744
FBgn0033860	Sperm-Leucylaminopeptidase 5	S-Lap5	CG18369	2R	2074	2.85706	1.53932	0.377971	4.07259	4.64932e-05	0.000179248
FBgn0030994	Heterochromatin Protein 1D3 chromoshadow domain	HP1D3csd	CG14193	X	816	21.4767	0.968996	0.238088	4.0699	4.70326e-05	0.000181126
FBgn0262480	-	CG43070	CG43070	2R	502	1.06072	1.90974	0.469475	4.06782	4.74557e-05	0.000182603
FBgn0035610	Leucokinin receptor	Lkr	CG10626	3L	2930	216.858	0.297333	0.0731034	4.06729	4.7563e-05	0.000182965
FBgn0039055	Ras association family member	Rassf	CG4656	3R	3473	1658.85	0.176412	0.0433755	4.06708	4.76052e-05	0.000183076
FBgn0015776	nervana 1	nrv1	CG9258	2L	2195	11636.5	0.2245	0.0552056	4.06661	4.77019e-05	0.000183397
FBgn0028374	Hugin	Hug	CG6371	3R	1033	3209.48	0.378546	0.0931059	4.06575	4.78776e-05	0.000183869
FBgn0039850	-	CG11333	CG11333	3R	715	1.05984	1.86051	0.457699	4.06492	4.80486e-05	0.000184475
FBgn0031721	-	CG14017	CG14017	2L	1179	3.664	1.52769	0.37591	4.06397	4.82446e-05	0.000185167
FBgn0028992	sds22	sds22	CG5851	3R	1354	1050.9	0.174483	0.0429347	4.06392	4.82556e-05	0.000185167
FBgn0030420	-	CG12717	CG12717	X	2970	622.713	0.259702	0.0639273	4.06246	4.85575e-05	0.000186274
FBgn0031240	-	CG3345	CG3345	2L	2417	136.344	0.431073	0.106123	4.06202	4.86506e-05	0.000186579
FBgn0037167	-	CG11425	CG11425	3L	998	606.355	0.567793	0.139801	4.06144	4.87707e-05	0.000186988
FBgn0038144	-	CG8870	CG8870	3R	1535	45.1289	0.656012	0.161702	4.05693	4.97223e-05	0.000190478
FBgn0286831			CG14438	X	10768	3428.41	0.179107	0.0441662	4.05529	5.00715e-05	0.000191763
FBgn0036978	Toll-9	Toll-9	CG5528	3L	3490	5.11269	1.5509	0.382461	4.05506	5.01223e-05	0.000191905
FBgn0030300	Sphingosine kinase 1	Sk1	CG1747	X	2680	914.018	0.343407	0.0848096	4.04916	5.14027e-05	0.000196698
FBgn0034156	-	CG5348	CG5348	2R	2126	47.7266	0.715395	0.176842	4.0454	5.22337e-05	0.000199768
FBgn0038057	RNA polymerase III subunit C	Polr3C	CG12267	3R	1650	233.654	0.226324	0.055999	4.04158	5.30929e-05	0.000202942
FBgn0032919	-	CG9253	CG9253	2L	1669	1464.85	0.159463	0.0394708	4.04003	5.34433e-05	0.000204225
FBgn0035790	Cytochrome P450 316a1	Cyp316a1	CG8540	3L	1455	63.2423	1.13051	0.27993	4.03855	5.37837e-05	0.000205413
FBgn0050487	-	CG30487	CG30487	2R	728	2.09323	1.56719	0.388219	4.03689	5.41649e-05	0.000206754
FBgn0035240	-	CG33791	CG33791	3L	5663	57.0374	0.917096	0.227362	4.03363	5.49219e-05	0.000209468
FBgn0032074	Tetraspanin 29Fa	Tsp29Fa	CG9494	2L	1247	45.9608	0.670199	0.166241	4.03149	5.54244e-05	0.000211213
FBgn0000357	Chorion protein 18	Cp18	CG6517	3L	649	76.7382	1.01377	0.251653	4.02845	5.61464e-05	0.000213769
FBgn0040028	-	CG17450	CG17450	X	1995	50.3607	0.780848	0.193834	4.02845	5.61468e-05	0.000213769
FBgn0260430	-	CG42525	CG42525	3L	1461	1.59613	1.8086	0.449151	4.02672	5.65613e-05	0.00021525
FBgn0035150	DNA polymerase Rev1	Rev1	CG12189	3L	3244	568.413	0.210331	0.0522368	4.02648	5.66169e-05	0.000215343
FBgn0040096	lectin-33A	lectin-33A	CG16834	2L	612	3.9672	1.39285	0.346244	4.02273	5.75281e-05	0.000218749
FBgn0030048	-	CG12112	CG12112	X	1117	254.637	0.649007	0.161423	4.02054	5.80637e-05	0.000220604
FBgn0019990	Gcn2	Gcn2	CG1609	3R	5737	1597.81	0.203105	0.050528	4.01965	5.82848e-05	0.000221383
FBgn0031413	-	CG9967	CG9967	2L	1783	265.248	0.400146	0.099563	4.01902	5.84404e-05	0.000221913
FBgn0036029	-	CG16719	CG16719	3L	1080	84.127	0.522008	0.129898	4.01859	5.85467e-05	0.000222256
FBgn0260991	Inner centromere protein	Incenp	CG12165	2R	2699	28.1362	1.06923	0.266123	4.01782	5.87395e-05	0.000222866
FBgn0034740	novel spermatogenesis regulator	nsr	CG3875	2R	2523	49.729	0.955364	0.237795	4.0176	5.8793e-05	0.000223008
FBgn0039217	-	CG13627	CG13627	3R	2528	9.55991	0.992582	0.247063	4.01753	5.88125e-05	0.000223021
FBgn0052301	-	CG32301	CG32301	3L	3574	5.68099	1.21357	0.302227	4.01544	5.93347e-05	0.000224755
FBgn0030703	membrane steroid binding protein	MSBP	CG9066	X	1503	8408.32	0.290854	0.0724389	4.01517	5.94038e-05	0.000224955
FBgn0038146	-	CG9799	CG9799	3R	2939	608.01	0.209475	0.0522032	4.01269	6.00297e-05	0.000227263
FBgn0028691	Regulatory particle non-ATPase 9	Rpn9	CG10230	3R	1578	2675.98	0.248336	0.0619291	4.01	6.07194e-05	0.000229749
FBgn0034970	yorkie	yki	CG4005	2R	1525	1428.74	0.123524	0.0308151	4.00856	6.10889e-05	0.000231084
FBgn0000244	blistery	by	CG9379	3R	4774	5277.7	0.184267	0.0459734	4.00812	6.12038e-05	0.000231456
FBgn0036058	-	CG6707	CG6707	3L	2135	6631.77	0.140432	0.035051	4.0065	6.16248e-05	0.00023292
FBgn0036652	-	CG13032	CG13032	3L	2187	5.85566	1.14079	0.285053	4.00202	6.2804e-05	0.000236861
FBgn0028886	-	CG15279	CG15279	2L	2531	827.836	0.550083	0.137454	4.00195	6.28233e-05	0.000236869
FBgn0030659	-	CG9215	CG9215	X	1945	482.178	0.171644	0.0428911	4.00186	6.28473e-05	0.000236895
FBgn0259230	lectin-22C	lectin-22C	CG42295	2L	857	1.42395	1.80971	0.452665	3.9979	6.39059e-05	0.000240689
FBgn0259986	nab	nab	CG33545	3L	2470	5.34377	1.23132	0.308113	3.99634	6.43299e-05	0.00024222
FBgn0038180	Chitinase 5	Cht5	CG9307	3R	2122	263.555	0.767151	0.192267	3.99002	6.60666e-05	0.000248489
FBgn0037620	ranshi	ranshi	CG9793	3R	1159	134.745	0.27232	0.0682797	3.9883	6.65488e-05	0.000250235
FBgn0034068	caspar	casp	CG8400	2R	2557	2511.74	0.131129	0.0328917	3.98669	6.70021e-05	0.000251803
FBgn0052857	-	CG32857	CG32857	X	1059	1119.58	0.261024	0.065496	3.98534	6.73822e-05	0.000253163
FBgn0039768	-	CG15533	CG15533	3R	2203	1.86259	1.68694	0.423299	3.98521	6.74208e-05	0.000253239
FBgn0261583	-	CG42693	CG42693	3R	408	1.1336	1.78733	0.448556	3.98464	6.75834e-05	0.000253781
FBgn0002715	meiotic from via Salaria 332	mei-S332	CG5303	2R	1594	129.608	0.336964	0.0845762	3.98415	6.77217e-05	0.000254232
FBgn0037234	-	CG9795	CG9795	3R	2825	2734.85	0.116002	0.0291223	3.98327	6.79747e-05	0.000255112
FBgn0041237	Gustatory receptor 58c	Gr58c	CG13491	2R	1239	7.29991	1.44099	0.362062	3.97996	6.89255e-05	0.000258541
FBgn0003114	plutonium	plu	CG9183	2R	616	3.76908	1.83926	0.462296	3.97854	6.93401e-05	0.000260026
FBgn0023526	-	CG2865	CG2865	X	5515	2054.79	0.241923	0.0608279	3.97717	6.97393e-05	0.000261381
FBgn0052269	-	CG32269	CG32269	3L	2037	9.33669	1.15598	0.290714	3.97635	6.998e-05	0.000262212
[truncated: 1,436 more rows]
